# Supplementary material for: Amino acid signatures of HLA Class-I and II molecules are strongly associated with SLE susceptibility and autoantibody production in Eastern Asians
Source: PLoS Genet. 2019 Apr 25;15(4):e1008092. doi: 10.1371/journal.pgen.1008092 (PMC6504188; doi:10.1371/journal.pgen.1008092)
Supplement: S4 Table — Logistic regression results for all amino acids across all cohorts, and meta-analysis. FA/FU: Case/control frequencies; OR, LCI, UCI: Odds ratio, 95% confidence interval. (XLSX) [file pgen.1008092.s010.xlsx]

## Sheet: ST4
SNP	BP	A1	A2	FAKR	FUKR	PKR	ORKR	LCIKR	UCIKR	FAHC	FUHC	PHC	ORHC	LCIHC	UCIHC	FAMC	FUMC	P	Estimate	SE	ORMC	LCIMC	UCIMC	MEtaDisc	Allele1	Allele2	Pmeta_dis	Direction	HetISq	HetPVal	OR_disc	LCI_disc	UCI_disc	FAJap1	FUJap1	PJap1	ORJap1	LCIJap1	UCIJap1	FATQ	FUTQ	P_TQ	ORTQ	LCITQ	UCITQ	FAJap2	FUJap2	PJap2	ORJap2
AA_A_102_30019057	30019057	H	D	0.008	0.006	0.126	1.43682	1.18297	2.28427	0.0067	0.0094	0.0614	0.366008	0.127683	1.04918	0.0041	0.011	0.217	-1.0979	0.8893	0.333571	0.0583715	1.90623		d	h	0.7352	-++	44.9	0.02656	0.931369	0.616752	1.40648	NA	NA	NA	NA	NA	NA	0.0082	0.0073	0.542	1.28184	0.577347	2.84598	NA	NA	NA	NA
AA_A_105_30019066	30019066	P	S	0.2159	0.2093	0.377	1.0439	1.0041	1.14829	0.3138	0.2662	0.0428	1.23738	1.00703	1.52043	0.4015	0.3483	0.0465	0.2693	0.1353	1.30905	1.00412	1.70657	99	p	s	0.02863	+++	1.5	0.1314	1.09615	1.00953	1.1902	0.233096	0.216277	0.117	1.12127	0.972151	1.29327	0.372	0.3249	0.197	1.09675	0.953115	1.26202	0.2468	0.2006	0.00176	0.748
AA_A_107_30019072	30019072	W	G	0.2956	0.2912	0.461	0.967945	0.997183	1.0555	0.2904	0.3309	0.0168	0.774529	0.628243	0.954878	0.2559	0.2857	0.374	-0.1402	0.1576	0.869184	0.638205	1.18376		g	w	0.07706	+++	-1.7	0.14	1.0724	0.992508	1.15872	0.253078	0.243274	0.328	1.07029	0.934345	1.226	0.266	0.2821	0.724	0.973541	0.83896	1.12971	0.2575	0.2283	0.258	0.905
AA_A_109_30019078	30019078	L	F	0.0051	0.0071	0.163	0.683704	0.816218	1.16632	0.0152	0.018	0.266	0.674421	0.336779	1.35057	0.0059	0.0059	0.561	-0.48616	0.83547	0.614983	0.119591	3.16249		f	l	0.0611	+++	0	0.9927	1.47935	0.981929	2.22874	NA	NA	NA	NA	NA	NA	0.0049	0.0041	0.222	1.89736	0.678472	5.30599	NA	NA	NA	NA
AA_A_-11_30018350_L	30018350	P	A	0.2101	0.2283	0.177	0.934307	0.993314	1.03125	0.1316	0.1222	0.84	0.971174	0.73158	1.28923	0.1403	0.1719	0.0317	-0.4515	0.2101	0.636672	0.42177	0.961074		a	p	0.07477	+++	-21.1	0.1917	1.08622	0.99179	1.18963	0.160398	0.163901	0.612	0.959515	0.817678	1.12596	0.1451	0.1592	0.83	1.02077	0.845744	1.23201	NA	NA	NA	NA
AA_A_-11_30018350_S	30018350	A	P	0.2104	0.2285	0.18	0.934662	0.99335	1.03167	0.1319	0.1229	0.813	0.96633	0.727903	1.28285	0.1412	0.1731	0.0311	-0.4524	0.2099	0.6361	0.421555	0.959833	99	a	p	0.07384	---	-21	0.1916	0.920443	0.840428	1.00808	0.160398	0.163901	0.612	0.959515	0.817678	1.12596	0.1455	0.1595	0.828	1.02101	0.845987	1.23224	NA	NA	NA	NA
AA_A_114_30019093_E	30019093	P	A	0.0405	0.032	0.000814	1.46041	1.08759	1.82291	0.067	0.0644	0.512	1.14134	0.76864	1.69474	0.0095	0.0164	0.383	-0.5511	0.6311	0.576316	0.167285	1.98547		a	p	0.002163	--+	-33.6	0.2237	0.741559	0.612565	0.897717	NA	NA	NA	NA	NA	NA	0.017	0.0309	0.0259	0.589386	0.370171	0.938421	NA	NA	NA	NA
AA_A_114_30019093_H	30019093	P	A	0.5096	0.52	0.0241	0.910583	0.992404	0.987804	0.4477	0.4929	0.0175	0.786864	0.645672	0.958931	0.4454	0.4575	0.659	-0.06079	0.13766	0.941021	0.71849	1.23247		a	p	0.002712	+++	0	0.3802	1.11728	1.03913	1.20132	0.601717	0.613321	0.456	0.955421	0.847509	1.07707	0.4594	0.474	0.463	0.951392	0.832972	1.08665	0.3932	0.3949	0.679	0.968
AA_A_114_30019093_Q	30019093	P	A	0.2818	0.3023	0.159	0.93823	0.994359	1.02528	0.1628	0.1473	0.439	1.11138	0.850826	1.45172	0.1524	0.1798	0.0689	-0.3654	0.2008	0.693919	0.468149	1.02857		a	p	0.1473	+-+	-5.4	0.1499	1.06279	0.978808	1.15398	0.287115	0.287699	0.868	0.989171	0.869718	1.12503	0.1827	0.1882	0.65	1.04145	0.873651	1.24148	0.2692	0.295	0.333	1.086
AA_A_114_30019093_R	30019093	P	A	0.1682	0.1458	0.00151	1.18544	1.01804	1.31683	0.3246	0.2973	0.165	1.15189	0.943344	1.40653	0.3947	0.3486	0.0633	0.2528	0.1361	1.28763	0.986141	1.68128		a	p	0.0001079	---	0	0.8014	0.840717	0.770044	0.917877	0.111083	0.0989529	0.149	1.1528	0.951274	1.39702	0.3416	0.3082	0.284	1.08079	0.937504	1.24598	0.1239	0.09981	0.0398	0.784
AA_A_116_30019099_D	30019099	P	A	0.4249	0.4215	0.173	1.0591	1.00475	1.15025	0.4867	0.4438	0.0543	1.20733	0.996512	1.46274	0.5463	0.5276	0.528	0.08649	0.13688	1.09034	0.833772	1.42586		a	p	0.03497	---	0	0.4691	0.924502	0.859494	0.994428	0.37987	0.369423	0.462	1.04799	0.925019	1.18731	0.5205	0.4924	0.231	1.08463	0.949652	1.23879	0.3878	0.3949	0.898	0.99
AA_A_116_30019099_H	30019099	P	A	0.0404	0.0319	0.000808	1.46056	1.08759	1.82295	0.067	0.0644	0.512	1.14122	0.768564	1.69458	0.0095	0.0164	0.382	-0.5515	0.6311	0.576085	0.167218	1.98468		a	p	0.002151	--+	-33.4	0.2232	0.741559	0.612565	0.897717	NA	NA	NA	NA	NA	NA	0.017	0.0309	0.0259	0.58939	0.370174	0.938426	NA	NA	NA	NA
AA_A_116_30019099_Y	30019099	P	A	0.5097	0.5201	0.0241	0.910547	0.992399	0.987784	0.4477	0.4929	0.0175	0.786864	0.645672	0.958931	0.4454	0.4575	0.659	-0.06077	0.13766	0.94104	0.718504	1.2325		a	p	0.002708	+++	0	0.3803	1.11739	1.03923	1.20144	0.601591	0.613236	0.454	0.955212	0.8473	1.07687	0.4594	0.474	0.462	0.951389	0.832969	1.08664	0.3932	0.3949	0.679	0.968
AA_A_127_30019132	30019132	K	N	0.5123	0.5213	0.0331	0.91545	0.992845	0.992966	0.4568	0.5061	0.0142	0.782548	0.643264	0.951991	0.4489	0.4576	0.723	-0.04867	0.13757	0.952495	0.727379	1.24728	99	k	n	0.003787	---	-74.5	0.3179	0.898705	0.836002	0.966112	0.601493	0.612575	0.473	0.957111	0.849036	1.07894	0.4622	0.4765	0.474	0.952611	0.834164	1.08788	0.3932	0.3949	0.679	0.968
AA_A_142_30019177	30019177	T	I	0.2983	0.2926	0.529	0.97268	0.997616	1.0602	0.2999	0.3448	0.0125	0.769588	0.626687	0.945074	0.2595	0.2865	0.417	-0.1272	0.1569	0.880558	0.647443	1.19761	99	t	i	0.08888	---	9.2	0.1105	0.935382	0.866206	1.01008	0.255109	0.24492	0.32	1.07094	0.935789	1.2256	0.2714	0.2856	0.747	0.975994	0.841988	1.13133	0.2575	0.2288	0.279	0.909
AA_A_144_30019183	30019183	Q	K	0.3303	0.3405	0.912	1.00496	1.00043	1.09705	0.2364	0.2203	0.48	1.0885	0.860364	1.37713	0.1648	0.206	0.0182	-0.4661	0.1973	0.627445	0.426216	0.923678		k	q	0.8823	--+	34.1	0.04806	1.00612	0.92843	1.09031	0.287251	0.287809	0.87	0.989312	0.86989	1.12513	0.2077	0.2257	0.82	0.980973	0.831177	1.15776	0.2692	0.295	0.333	1.086
AA_A_145_30019186	30019186	H	R	0.2982	0.2925	0.53	0.972777	0.997625	1.06031	0.2999	0.3448	0.0126	0.769896	0.626938	0.945452	0.2595	0.2865	0.417	-0.1273	0.1569	0.880469	0.647379	1.19749	99	h	r	0.0895	---	9	0.1111	0.935569	0.86638	1.01028	0.255138	0.244953	0.32	1.07091	0.935779	1.22555	0.2714	0.2856	0.747	0.975994	0.841988	1.13133	0.2575	0.2288	0.279	0.909
AA_A_-15_30018338_L	30018338	P	A	0.4078	0.3983	0.0326	1.09564	1.00768	1.19135	0.505	0.4601	0.0438	1.21896	1.00554	1.47768	0.5353	0.5239	0.69	0.05492	0.13751	1.05646	0.806864	1.38326		a	p	0.005637	---	0	0.568	0.900955	0.836782	0.97005	0.27141	0.262792	0.571	1.03906	0.91024	1.1861	0.4922	0.4882	0.717	1.02458	0.898626	1.1682	NA	NA	NA	NA
AA_A_-15_30018338_V	30018338	A	P	0.4081	0.3985	0.0321	1.09584	1.00769	1.1915	0.5052	0.4606	0.0459	1.21654	1.00358	1.47468	0.5362	0.5253	0.692	0.0544	0.1374	1.05591	0.806619	1.38224	99	a	p	0.005701	+++	0	0.5787	1.10971	1.03067	1.19482	0.27141	0.262792	0.571	1.03906	0.91024	1.1861	0.4926	0.4884	0.714	1.02482	0.898833	1.16846	NA	NA	NA	NA
AA_A_150_30019201	30019201	V	A	0.0165	0.0184	0.626	0.927298	0.977375	1.25572	0.0526	0.0522	0.537	0.873366	0.568008	1.34288	0.0094	0.0094	0.674	-0.2594	0.6159	0.771514	0.230717	2.57993		a	v	0.4102	+++	0	0.9428	1.10738	0.868625	1.41177	NA	NA	NA	NA	NA	NA	0.0081	0.0149	0.0746	0.551841	0.287049	1.0609	0.002137	0.005095	0.395	1.947
AA_A_151_30019204	30019204	R	H	0.2472	0.2559	0.973	1.00169	1.00016	1.10372	0.1977	0.1852	0.722	1.04648	0.814456	1.3446	0.1491	0.1888	0.0154	-0.4994	0.2062	0.606895	0.405128	0.909147		h	r	0.7093	--+	31.7	0.05356	1.01694	0.931089	1.11071	0.160465	0.163968	0.609	0.959123	0.81729	1.12557	0.1602	0.1887	0.436	0.931512	0.779221	1.11357	0.1303	0.1899	0.000294	1.479
AA_A_152_30019207_A	30019207	P	A	0.1316	0.1221	0.173	1.08321	1.00924	1.21531	0.2621	0.2149	0.0351	1.2644	1.01659	1.57263	0.3807	0.3257	0.0303	0.3003	0.1387	1.35026	1.02886	1.77208		a	p	0.004987	---	-29	0.2123	0.872319	0.79306	0.959499	0.1064	0.0926132	0.0758	1.19581	0.982656	1.45521	0.3216	0.2858	0.441	1.0584	0.916152	1.22272	0.1207	0.09495	0.0325	0.774
AA_A_152_30019207_V	30019207	A	P	0.2977	0.2687	0.000196	1.18283	1.01495	1.2921	0.4384	0.3938	0.00926	1.30161	1.06721	1.58748	0.4751	0.433	0.115	0.217	0.1378	1.24234	0.948297	1.62757	99	a	p	2.3e-06	+++	0	0.6709	1.20502	1.11525	1.30202	0.239058	0.222984	0.162	1.10671	0.960451	1.27525	0.4461	0.3995	0.0956	1.12779	0.979057	1.29912	0.2628	0.2054	0.000106	0.702
AA_A_152_30019207_W	30019207	P	A	0.0364	0.0273	0.000867	1.46957	1.09113	1.84324	0.0659	0.0638	0.502	1.14614	0.769911	1.70622	0.0095	0.0165	0.381	-0.553	0.6312	0.575222	0.166935	1.98209		a	p	0.002297	--+	-32.6	0.2214	0.739042	0.608455	0.897656	NA	NA	NA	NA	NA	NA	0.0151	0.0293	0.0116	0.534262	0.328429	0.869095	NA	NA	NA	NA
AA_A_156_30019219_L	30019219	P	A	0.5437	0.5398	0.812	1.00988	1.0008	1.09492	0.506	0.5532	0.0379	0.816564	0.674351	0.988768	0.3481	0.424	0.0136	-0.3588	0.1454	0.698514	0.525301	0.928843		a	p	0.2328	-++	55.7	0.01094	1.04488	0.972167	1.12303	0.418844	0.414326	0.764	1.01859	0.903105	1.14883	0.3829	0.4485	0.0477	0.866147	0.751324	0.998517	0.391	0.4231	0.0653	1.151
AA_A_156_30019219_Q	30019219	P	A	0.3293	0.3327	0.63	0.979356	0.998233	1.06602	0.368	0.3263	0.0393	1.22874	1.0102	1.49456	0.5615	0.4883	0.0111	0.3423	0.1348	1.40818	1.08122	1.83402		a	p	0.2808	+--	59	0.007569	0.959733	0.890675	1.03415	0.449362	0.457459	0.584	0.967657	0.860083	1.08868	0.504	0.4618	0.485	1.04984	0.915938	1.20331	0.4679	0.4662	0.932	0.994
AA_A_156_30019219_R	30019219	P	A	0.0165	0.0184	0.641	0.93041	0.978392	1.25952	0.0526	0.0523	0.533	0.872057	0.567156	1.34087	0.0094	0.0094	0.676	-0.2573	0.6159	0.773136	0.231202	2.58536		a	p	0.4182	+++	0	0.9389	1.10539	0.867233	1.40895	NA	NA	NA	NA	NA	NA	0.0082	0.0149	0.0745	0.551667	0.286939	1.06063	0.002137	0.005095	0.395	1.947
AA_A_158_30019225	30019225	V	A	0.0165	0.0183	0.65	0.932207	0.978973	1.26178	0.0526	0.0523	0.533	0.872057	0.567156	1.34087	0.0094	0.0094	0.676	-0.2573	0.6159	0.773136	0.231202	2.58536		a	v	0.4239	+++	0	0.9368	1.10396	0.866276	1.40685	NA	NA	NA	NA	NA	NA	0.0082	0.0149	0.0745	0.551667	0.286939	1.06063	0.002137	0.005095	0.395	1.947
AA_A_161_30019234	30019234	D	E	0.0258	0.0161	9.34e-05	1.70347	1.15296	2.22527	0.0477	0.0609	0.823	0.952943	0.624885	1.45323	0.0076	0.0131	0.449	-0.5464	0.7216	0.579031	0.140755	2.38199	99	d	e	0.00251	+--	40.8	0.03411	1.41016	1.12845	1.76218	NA	NA	NA	NA	NA	NA	0.0093	0.0137	0.544	1.21219	0.650695	2.25821	0.003205	0.004863	0.821	1.162
AA_A_163_30019240_R	30019240	P	A	0.2023	0.193	0.273	1.05614	1.00534	1.16438	0.3	0.2493	0.0176	1.29137	1.04562	1.59487	0.3953	0.3415	0.0394	0.2829	0.1374	1.32697	1.01369	1.73708		a	p	0.01122	---	14	0.09776	0.89691	0.824578	0.975587	0.23372	0.216573	0.116	1.12139	0.972448	1.29315	0.356	0.3184	0.219	1.09273	0.948766	1.25853	NA	NA	NA	NA
AA_A_163_30019240_T	30019240	A	P	0.2024	0.1931	0.271	1.05638	1.00537	1.16465	0.3002	0.2499	0.0184	1.2893	1.04374	1.59263	0.3954	0.3421	0.0409	0.2808	0.1373	1.32419	1.01176	1.73309	99	a	p	0.01146	+++	12.3	0.1023	1.1146	1.02472	1.21238	0.23372	0.216573	0.116	1.12139	0.972448	1.29315	0.3561	0.3189	0.233	1.08983	0.946208	1.25524	NA	NA	NA	NA
AA_A_166_30019249	30019249	D	E	0.2305	0.2472	0.059	0.91469	0.991779	1.00341	0.2085	0.2129	0.674	0.952333	0.758691	1.1954	0.1961	0.1779	0.695	0.06618	0.16886	1.06842	0.76737	1.48757	99	d	e	0.08044	--+	0	0.6572	0.928672	0.854783	1.00895	0.350609	0.372264	0.1	0.902953	0.799206	1.02017	0.1949	0.2044	0.316	0.915608	0.770533	1.088	0.3515	0.3814	0.146	1.121
AA_A_167_30019252	30019252	G	W	0.2305	0.2472	0.059	0.91469	0.991779	1.00341	0.2085	0.2129	0.673	0.952219	0.7586	1.19526	0.1961	0.1779	0.696	0.06605	0.16885	1.06828	0.767286	1.48735	99	g	w	0.08034	--+	0	0.6578	0.928672	0.854783	1.00895	0.350609	0.372264	0.1	0.902953	0.799206	1.02017	0.1949	0.2043	0.318	0.915903	0.770783	1.08835	0.3515	0.3814	0.146	1.121
AA_A_17_30018561	30018561	S	R	0.0404	0.0319	0.000811	1.46049	1.08758	1.8229	0.0667	0.0643	0.518	1.1394	0.767184	1.6922	0.0094	0.0163	0.384	-0.5502	0.6317	0.576834	0.167239	1.9896		r	s	0.002179	--+	-33.2	0.2229	0.741782	0.612749	0.897987	NA	NA	NA	NA	NA	NA	0.0169	0.0308	0.026	0.589646	0.370327	0.938851	NA	NA	NA	NA
AA_A_184_30019881_A	30019881	P	A	0.3906	0.3858	0.591	0.97781	0.998165	1.06123	0.3592	0.406	0.0078	0.767336	0.631341	0.932626	0.2843	0.3199	0.237	-0.1793	0.1518	0.835855	0.620749	1.1255		a	p	0.07695	+++	29	0.05974	1.06823	0.992917	1.14925	0.381832	0.368814	0.264	1.07146	0.949194	1.20948	0.3295	0.3313	0.718	1.02643	0.890836	1.18267	NA	NA	NA	NA
AA_A_184_30019881_P	30019881	A	P	0.3907	0.3859	0.589	0.977693	0.998155	1.0611	0.3594	0.4062	0.00784	0.767475	0.631442	0.932812	0.2844	0.32	0.237	-0.1796	0.1518	0.835604	0.620563	1.12516	99	a	p	0.07658	---	28.9	0.06008	0.936037	0.870047	1.00703	0.381832	0.368814	0.264	1.07146	0.949194	1.20948	0.3296	0.3314	0.721	1.02618	0.890649	1.18235	NA	NA	NA	NA
AA_A_193_30019908_A	30019908	P	A	0.588	0.6007	0.108	0.936393	0.994747	1.01453	0.469	0.5006	0.0444	0.827455	0.687955	0.995243	0.4151	0.4764	0.0325	-0.2881	0.1348	0.749687	0.57562	0.976391		a	p	0.005699	+++	-12.7	0.1694	1.10506	1.02957	1.18608	0.541458	0.532397	0.496	1.04196	0.925693	1.17283	0.4622	0.4807	0.883	1.01036	0.881114	1.15856	NA	NA	NA	NA
AA_A_193_30019908_P	30019908	A	P	0.588	0.6008	0.107	0.936262	0.994737	1.01437	0.4692	0.5009	0.0445	0.827497	0.687962	0.995332	0.4151	0.4766	0.0324	-0.2884	0.1348	0.749462	0.575447	0.976098	99	a	p	0.005641	---	-12.7	0.1695	0.904837	0.843027	0.971179	0.541458	0.532397	0.496	1.04196	0.925693	1.17283	0.4624	0.4809	0.885	1.01015	0.880959	1.15828	NA	NA	NA	NA
AA_A_194_30019911_I	30019911	A	P	0.588	0.6008	0.107	0.936271	0.994738	1.01438	0.4692	0.5009	0.0445	0.827497	0.687962	0.995332	0.4151	0.4766	0.0324	-0.2883	0.1348	0.749537	0.575505	0.976196	99	a	p	0.005648	---	-12.7	0.1696	0.904837	0.843027	0.971179	0.54143	0.532359	0.497	1.04188	0.925601	1.17277	0.4623	0.4807	0.884	1.01021	0.880996	1.15838	NA	NA	NA	NA
AA_A_194_30019911_V	30019911	P	A	0.588	0.6007	0.108	0.936337	0.994742	1.01447	0.469	0.5006	0.0444	0.827455	0.687955	0.995243	0.4151	0.4764	0.0325	-0.2881	0.1348	0.749687	0.57562	0.976391		a	p	0.005677	+++	-12.7	0.1696	1.10506	1.02957	1.18608	0.54143	0.532359	0.497	1.04188	0.925601	1.17277	0.4621	0.4806	0.882	1.01046	0.88118	1.1587	NA	NA	NA	NA
AA_A_207_30019950_G	30019950	A	P	0.588	0.6008	0.107	0.93629	0.994739	1.0144	0.4692	0.5009	0.0444	0.827455	0.687928	0.995282	0.4151	0.4765	0.0325	-0.2882	0.1348	0.749612	0.575562	0.976294	99	a	p	0.005656	---	-12.7	0.1696	0.904837	0.843027	0.971179	0.541417	0.532306	0.494	1.04212	0.925812	1.17305	0.4623	0.4808	0.885	1.01018	0.880978	1.15833	NA	NA	NA	NA
AA_A_207_30019950_S	30019950	P	A	0.588	0.6007	0.108	0.936365	0.994744	1.0145	0.469	0.5006	0.0443	0.827455	0.687955	0.995243	0.4151	0.4764	0.0327	-0.2879	0.1348	0.749837	0.575735	0.976586		a	p	0.005695	+++	-12.8	0.1699	1.10506	1.02957	1.18608	0.541417	0.532306	0.494	1.04212	0.925812	1.17305	0.462	0.4805	0.88	1.01058	0.881262	1.15887	NA	NA	NA	NA
AA_A_246_30020067_A	30020067	A	P	0.2901	0.3085	0.269	0.951458	0.995621	1.03919	0.1688	0.1564	0.838	1.02731	0.793432	1.33012	0.1555	0.19	0.0331	-0.4258	0.1999	0.653247	0.441488	0.966575	99	a	p	0.1607	-+-	-4.3	0.147	0.943273	0.869243	1.02361	0.287848	0.288004	0.865	0.988882	0.869579	1.12455	0.1915	0.1958	0.568	1.05193	0.884144	1.25155	NA	NA	NA	NA
AA_A_246_30020067_S	30020067	P	A	0.29	0.3084	0.272	0.951753	0.995649	1.03949	0.1684	0.1559	0.817	1.03113	0.795702	1.33623	0.1554	0.1897	0.0337	-0.4243	0.1998	0.654228	0.442238	0.967837		a	p	0.1653	+-+	-4	0.1461	1.0595	0.976352	1.14974	0.287848	0.288004	0.865	0.988882	0.869579	1.12455	0.191	0.1953	0.563	1.0526	0.884582	1.25254	NA	NA	NA	NA
AA_A_253_30020088_E	30020088	A	P	0.5882	0.601	0.106	0.936028	0.99472	1.01407	0.4697	0.4999	0.0531	0.833618	0.693242	1.00242	0.4148	0.4755	0.0351	-0.2834	0.1345	0.753218	0.578672	0.980414	99	a	p	0.006192	---	-21	0.1915	0.905924	0.844039	0.972346	0.542447	0.532996	0.484	1.04308	0.926776	1.17399	0.4625	0.4815	0.882	1.01045	0.88117	1.1587	NA	NA	NA	NA
AA_A_253_30020088_Q	30020088	P	A	0.5881	0.601	0.106	0.936037	0.99472	1.01408	0.4696	0.4998	0.0533	0.833785	0.69338	1.00262	0.4146	0.4752	0.0353	-0.2831	0.1345	0.753444	0.578845	0.980709		a	p	0.006223	+++	-21.4	0.1924	1.10385	1.02844	1.18478	0.542447	0.532996	0.484	1.04308	0.926776	1.17399	0.4624	0.4812	0.87	1.01152	0.882082	1.15995	NA	NA	NA	NA
AA_A_276_30020259_L	30020259	P	A	0.1977	0.17	5.31e-05	1.22976	1.02096	1.35952	0.3745	0.3382	0.0297	1.24446	1.02176	1.5157	0.3959	0.3538	0.075	0.2429	0.1364	1.27494	0.975852	1.6657		a	p	8.859e-07	---	0	0.9676	0.808479	0.742696	0.880089	0.111511	0.0990534	0.145	1.15415	0.952712	1.39819	0.3469	0.3285	0.785	1.01985	0.885432	1.17468	NA	NA	NA	NA
AA_A_276_30020259_P	30020259	A	P	0.1979	0.1702	5.46e-05	1.22939	1.02094	1.35914	0.3747	0.3384	0.0297	1.24433	1.02166	1.51555	0.3961	0.3541	0.0754	0.2425	0.1364	1.27443	0.975462	1.66503	99	a	p	9.179e-07	+++	0	0.9677	1.23664	1.13602	1.34618	0.111511	0.0990534	0.145	1.15415	0.952712	1.39819	0.3471	0.3288	0.795	1.01892	0.884594	1.17364	NA	NA	NA	NA
AA_A_282_30020277_I	30020277	A	P	0.2142	0.2291	0.0704	0.915541	0.991601	1.00738	0.1577	0.1633	0.817	0.970562	0.753391	1.25033	0.1903	0.1722	0.657	0.07575	0.17052	1.07869	0.772233	1.50677	99	a	p	0.1098	--+	0	0.6167	0.931928	0.854759	1.01606	0.347196	0.368414	0.107	0.904751	0.800855	1.02212	0.1911	0.1921	0.536	0.946463	0.794938	1.12687	NA	NA	NA	NA
AA_A_282_30020277_V	30020277	P	A	0.214	0.2289	0.0715	0.91588	0.991637	1.00773	0.1573	0.163	0.814	0.970048	0.752903	1.24982	0.19	0.1719	0.658	0.07559	0.17054	1.07852	0.772079	1.50659		a	p	0.1108	++-	0	0.6198	1.07283	0.983993	1.16969	0.347196	0.368414	0.107	0.904751	0.800855	1.02212	0.1909	0.1918	0.548	0.947885	0.796145	1.12855	NA	NA	NA	NA
AA_A_294_30020313_F	30020313	P	A	0.5882	0.6008	0.11	0.93674	0.994779	1.01486	0.4686	0.4991	0.0489	0.830855	0.690917	0.999136	0.4147	0.4753	0.0355	-0.2828	0.1345	0.753671	0.579019	0.981003		a	p	0.006277	+++	-18.1	0.1839	1.10374	1.02834	1.18466	0.542437	0.53299	0.484	1.04309	0.926777	1.17399	0.4622	0.4809	0.859	1.01245	0.882857	1.16106	NA	NA	NA	NA
AA_A_294_30020313_L	30020313	A	P	0.5883	0.6011	0.108	0.936346	0.994747	1.01442	0.4689	0.4994	0.049	0.830946	0.691006	0.999227	0.415	0.4756	0.0355	-0.2828	0.1345	0.753671	0.579019	0.981003	99	a	p	0.006109	---	-18.8	0.1856	0.905743	0.843871	0.972151	0.542437	0.53299	0.484	1.04309	0.926777	1.17399	0.4624	0.4813	0.873	1.0112	0.88182	1.15957	NA	NA	NA	NA
AA_A_297_30020322_M	30020322	P	A	0.0058	0.0078	0.166	0.686074	0.818054	1.16912	0.0153	0.0179	0.281	0.682836	0.341449	1.36555	0.0055	0.0056	0.542	-0.5114	0.8386	0.599655	0.115897	3.10265		a	p	0.06396	+++	0	0.9882	1.47226	0.977802	2.21676	NA	NA	NA	NA	NA	NA	0.0049	0.0046	0.261	1.78014	0.651101	4.86696	NA	NA	NA	NA
AA_A_297_30020322_V	30020322	A	P	0.0052	0.0072	0.169	0.687943	0.819289	1.17212	0.0155	0.0182	0.28	0.682905	0.341885	1.36408	0.0057	0.006	0.541	-0.5115	0.83636	0.599596	0.116395	3.08875	99	a	p	0.06481	---	0	0.9878	0.680315	0.452008	1.02394	NA	NA	NA	NA	NA	NA	0.005	0.0051	0.349	1.60959	0.593852	4.36266	NA	NA	NA	NA
AA_A_298_30020325_F	30020325	P	A	0.2108	0.2283	0.205	0.938089	0.99371	1.03543	0.131	0.1215	0.837	0.970581	0.730504	1.28956	0.1394	0.1721	0.0292	-0.4574	0.2098	0.632927	0.419535	0.954859		a	p	0.08599	+++	-15.7	0.1775	1.08296	0.988819	1.18607	0.160448	0.163949	0.594	0.957423	0.815825	1.1236	0.1455	0.1599	0.87	1.0158	0.841347	1.22643	NA	NA	NA	NA
AA_A_298_30020325_I	30020325	A	P	0.2108	0.2285	0.199	0.937358	0.993634	1.03462	0.1313	0.1217	0.84	0.971242	0.731029	1.29039	0.1396	0.1724	0.0291	-0.458	0.2098	0.632547	0.419283	0.954286	99	a	p	0.08357	---	-15.6	0.1772	0.922839	0.842616	1.0107	0.160448	0.163949	0.594	0.957423	0.815825	1.1236	0.1457	0.1603	0.896	1.01263	0.838739	1.22256	NA	NA	NA	NA
AA_A_299_30020328_A	30020328	P	A	0.2901	0.3083	0.282	0.952791	0.995747	1.04058	0.1685	0.1564	0.847	1.0258	0.792219	1.32824	0.1552	0.1893	0.0342	-0.4229	0.1997	0.655144	0.442944	0.969003		a	p	0.1689	+-+	-5.7	0.1507	1.05897	0.976055	1.14894	0.287804	0.28799	0.863	0.988787	0.869485	1.12446	0.1912	0.1952	0.544	1.0553	0.887017	1.25551	NA	NA	NA	NA
AA_A_299_30020328_T	30020328	A	P	0.2902	0.3085	0.279	0.952486	0.995719	1.04023	0.169	0.1566	0.839	1.0271	0.793257	1.32988	0.1554	0.1897	0.0341	-0.4234	0.1998	0.654817	0.442636	0.968708	99	a	p	0.1677	-+-	-5.2	0.1495	0.944216	0.870284	1.02443	0.287804	0.28799	0.863	0.988787	0.869485	1.12446	0.1914	0.1956	0.56	1.05295	0.885105	1.25262	NA	NA	NA	NA
AA_A_307_30020352_M	30020352	A	P	0.211	0.2285	0.203	0.937892	0.993692	1.03517	0.1313	0.1216	0.845	0.972116	0.731716	1.2915	0.1396	0.1724	0.0291	-0.4579	0.2098	0.632611	0.419325	0.954381	99	a	p	0.08576	---	-15.2	0.1763	0.923393	0.843122	1.01131	0.160448	0.163949	0.594	0.957423	0.815825	1.1236	0.1456	0.16	0.883	1.01424	0.840023	1.22458	NA	NA	NA	NA
AA_A_307_30020352_R	30020352	P	A	0.2108	0.2283	0.205	0.938193	0.993721	1.03554	0.131	0.1215	0.837	0.970611	0.730511	1.28962	0.1394	0.1721	0.0292	-0.4575	0.2098	0.632864	0.419493	0.954763		a	p	0.08635	+++	-15.6	0.1772	1.08285	0.98872	1.18595	0.160448	0.163949	0.594	0.957423	0.815825	1.1236	0.1455	0.1597	0.864	1.01661	0.841983	1.22746	NA	NA	NA	NA
AA_A_311_30020364_K	30020364	A	P	0.2141	0.2291	0.0689	0.915083	0.991552	1.00689	0.1575	0.1629	0.832	0.972875	0.755083	1.25349	0.1899	0.1718	0.667	0.0731	0.1701	1.07584	0.770823	1.50155	99	a	p	0.1085	--+	0	0.6178	0.931648	0.854502	1.01576	0.347151	0.368398	0.107	0.904643	0.800739	1.02203	0.1909	0.1917	0.544	0.947374	0.795606	1.12809	NA	NA	NA	NA
AA_A_311_30020364_N	30020364	P	A	0.214	0.2289	0.0699	0.915413	0.991587	1.00724	0.1572	0.1628	0.827	0.972126	0.754502	1.25252	0.1897	0.1716	0.667	0.07322	0.17002	1.07597	0.771037	1.50149		a	p	0.1095	++-	0	0.6201	1.07304	0.98419	1.16992	0.347151	0.368398	0.107	0.904643	0.800739	1.02203	0.1908	0.1914	0.559	0.94929	0.797225	1.13036	NA	NA	NA	NA
AA_A_321_30020836_S	30020836	A	P	0.1978	0.1702	5.56e-05	1.22911	1.02091	1.3588	0.3758	0.3388	0.0254	1.25182	1.028	1.52437	0.3959	0.3537	0.0753	0.2425	0.1363	1.27443	0.975653	1.66471	99	a	p	8.121e-07	+++	0	0.9621	1.23776	1.13727	1.34712	0.11152	0.0990596	0.145	1.15413	0.952692	1.39817	0.3469	0.3285	0.796	1.01883	0.884565	1.17346	NA	NA	NA	NA
AA_A_321_30020836_T	30020836	P	A	0.1978	0.1703	5.83e-05	1.22841	1.02085	1.35803	0.3753	0.3387	0.0265	1.24982	1.02636	1.52193	0.3959	0.3536	0.0748	0.243	0.1364	1.27507	0.97595	1.66586		a	p	8.794e-07	---	0	0.9615	0.808399	0.742622	0.880001	0.11152	0.0990596	0.145	1.15413	0.952692	1.39817	0.3469	0.3281	0.777	1.02064	0.88612	1.17559	NA	NA	NA	NA
AA_A_334_30021017_M	30021017	P	A	0.2902	0.3084	0.28	0.952619	0.995733	1.04035	0.168	0.1563	0.839	1.02725	0.793112	1.33052	0.1551	0.1893	0.0342	-0.4229	0.1997	0.655144	0.442944	0.969003		a	p	0.1686	+-+	-5.4	0.1498	1.05897	0.976055	1.14894	0.287838	0.287998	0.864	0.988871	0.869571	1.12454	0.1913	0.195	0.532	1.057	0.888414	1.25758	NA	NA	NA	NA
AA_A_334_30021017_V	30021017	A	P	0.2903	0.3085	0.282	0.952829	0.995753	1.04056	0.1682	0.1567	0.869	1.02198	0.789177	1.32345	0.1552	0.1895	0.0342	-0.4229	0.1997	0.655144	0.442944	0.969003	99	a	p	0.1662	-+-	-6.6	0.1533	0.944027	0.87011	1.02422	0.287838	0.287998	0.864	0.988871	0.869571	1.12454	0.1915	0.1955	0.548	1.05471	0.886596	1.2547	NA	NA	NA	NA
AA_A_44_30018642	30018642	K	R	0.0164	0.0183	0.619	0.925844	0.976897	1.25398	0.0522	0.0521	0.525	0.869619	0.56546	1.33738	0.0093	0.0092	0.673	-0.2603	0.6164	0.77082	0.230284	2.58014	99	k	r	0.3995	---	0	0.9413	0.900865	0.706633	1.14849	NA	NA	NA	NA	NA	NA	0.0081	0.0148	0.0752	0.552905	0.287822	1.06213	0.002137	0.005095	0.395	1.947
AA_A_56_30018678	30018678	R	G	0.0984	0.0822	0.00175	1.24249	1.02997	1.42348	0.1016	0.102	0.747	1.05153	0.775311	1.42617	0.0305	0.0425	0.107	-0.571	0.3542	0.56496	0.282174	1.13115		g	r	0.007839	--+	26.3	0.06632	0.847216	0.749684	0.957436	0.112651	0.0916209	0.038	1.2249	1.01239	1.48201	0.0403	0.062	0.139	0.793663	0.584416	1.07783	0.0812	0.0711	0.26	0.854
AA_A_62_30018696_E	30018696	P	A	0.2141	0.2288	0.0735	0.916475	0.991704	1.00833	0.1572	0.1614	0.907	0.985033	0.764939	1.26845	0.1898	0.1716	0.662	0.07427	0.1701	1.0771	0.771726	1.5033		a	p	0.1225	++-	0	0.5995	1.07037	0.981925	1.16677	0.346626	0.368418	0.099	0.90254	0.798822	1.01973	0.193	0.1912	0.584	0.952441	0.800069	1.13383	0.3494	0.3763	0.176	1.113
AA_A_62_30018696_G	30018696	P	A	0.2959	0.2913	0.466	0.968313	0.997219	1.0558	0.2885	0.3318	0.0106	0.761626	0.61814	0.938418	0.256	0.2865	0.365	-0.1426	0.1573	0.867101	0.637049	1.18023		a	p	0.06764	+++	12.1	0.1027	1.07476	0.994694	1.16128	0.255121	0.244928	0.319	1.07111	0.935967	1.22578	0.2663	0.2829	0.71	0.972259	0.838191	1.12777	0.2575	0.2288	0.279	0.909
AA_A_62_30018696_L	30018696	P	A	0.0079	0.006	0.14	1.41393	1.17293	2.24089	0.0053	0.008	0.0582	0.32501	0.101574	1.03994	0.004	0.0108	0.218	-1.0953	0.8894	0.334439	0.058512	1.91157		a	p	0.7186	-++	44	0.02805	0.926446	0.611331	1.40399	NA	NA	NA	NA	NA	NA	0.0084	0.0071	0.475	1.33577	0.603928	2.95448	NA	NA	NA	NA
AA_A_62_30018696_Q	30018696	P	A	0.261	0.2275	4.03e-05	1.20909	1.01736	1.32379	0.4238	0.3939	0.0881	1.17931	0.97566	1.42547	0.4222	0.3857	0.214	0.1672	0.1345	1.18199	0.908083	1.53852		a	p	4.045e-06	---	0	0.9654	0.832269	0.769813	0.899792	0.223674	0.190505	0.00781	1.21801	1.05386	1.40772	0.3755	0.3639	0.666	1.03066	0.898596	1.18213	0.2051	0.1709	0.0149	0.791
AA_A_62_30018696_R	30018696	P	A	0.2212	0.2463	0.052	0.907066	0.990449	1.00085	0.1269	0.1069	0.122	1.26947	0.93835	1.71744	0.13	0.1475	0.319	-0.2258	0.2266	0.797878	0.511741	1.244		a	p	0.1224	+-+	16.3	0.09178	1.07476	0.980756	1.17778	0.174569	0.196163	0.0681	0.867774	0.744492	1.01147	0.1576	0.1565	0.833	1.02036	0.846469	1.22997	0.188	0.2244	0.0619	1.198
AA_A_63_30018699_E	30018699	A	P	0.2294	0.2526	0.105	0.922627	0.992186	1.01703	0.1316	0.1144	0.352	1.14763	0.85883	1.53355	0.133	0.1582	0.169	-0.3087	0.2245	0.734401	0.472972	1.14033	99	a	p	0.1348	-+-	-27.1	0.2073	0.93342	0.852778	1.02169	0.174569	0.196163	0.0681	0.867774	0.744492	1.01147	0.1659	0.163	0.674	1.04025	0.865498	1.2503	NA	NA	NA	NA
AA_A_63_30018699_N	30018699	P	A	0.2213	0.2464	0.0531	0.907465	0.99049	1.00131	0.127	0.1071	0.123	1.2682	0.937596	1.71538	0.1295	0.1479	0.303	-0.2335	0.2265	0.791758	0.507916	1.23422		a	p	0.1225	+-+	16.6	0.09096	1.07476	0.980756	1.17778	0.174569	0.196163	0.0681	0.867774	0.744492	1.01147	0.1577	0.1563	0.814	1.02263	0.848308	1.23279	NA	NA	NA	NA
AA_A_63_30018699_Q	30018699	P	A	0.008	0.0061	0.141	1.41318	1.17267	2.23988	0.0053	0.008	0.058	0.324652	0.101463	1.0388	0.004	0.0109	0.218	-1.0951	0.8893	0.334506	0.0585351	1.91158		a	p	0.721	-++	44	0.02803	0.927002	0.611578	1.4051	NA	NA	NA	NA	NA	NA	0.0084	0.0072	0.494	1.31872	0.596554	2.91512	NA	NA	NA	NA
AA_A_65_30018705	30018705	G	R	0.2141	0.2288	0.0735	0.916485	0.991705	1.00834	0.1572	0.1614	0.905	0.984738	0.764665	1.26815	0.1898	0.1716	0.663	0.07426	0.1701	1.07709	0.771718	1.50329	99	g	r	0.1224	--+	0	0.6002	0.93426	0.857066	1.01841	0.346626	0.368418	0.099	0.90254	0.798822	1.01973	0.193	0.1912	0.583	0.952389	0.800024	1.13377	0.3494	0.3763	0.176	1.113
AA_A_66_30018708	30018708	K	N	0.5184	0.5293	0.0314	0.915166	0.992869	0.992114	0.4453	0.4927	0.0129	0.777867	0.638164	0.948152	0.4487	0.4609	0.679	-0.05699	0.13752	0.944604	0.721423	1.23683	99	k	n	0.003323	---	-68.9	0.306	0.897717	0.835247	0.96486	0.601726	0.613318	0.457	0.95557	0.84765	1.07723	0.4741	0.4776	0.411	0.945943	0.828582	1.07993	0.3932	0.3953	0.712	0.971
AA_A_67_30018711	30018711	M	V	0.0164	0.0183	0.619	0.925964	0.976938	1.25409	0.0524	0.0521	0.531	0.87136	0.566592	1.34006	0.0093	0.0092	0.678	-0.2558	0.6165	0.774297	0.231277	2.59229	99	m	v	0.4036	---	0	0.9442	0.901676	0.707269	1.14952	NA	NA	NA	NA	NA	NA	0.0081	0.0148	0.0748	0.552338	0.287489	1.06118	0.002137	0.005095	0.395	1.947
AA_A_70_30018720	30018720	Q	H	0.202	0.1691	1.15e-06	1.28685	1.02596	1.42448	0.3471	0.3164	0.0242	1.26504	1.03115	1.55197	0.4166	0.3854	0.166	0.1895	0.1367	1.20865	0.924565	1.58001		h	q	3.373e-08	---	0	0.9092	0.784507	0.719686	0.855166	0.107032	0.0953804	0.157	1.15219	0.947642	1.40089	0.3917	0.3424	0.758	1.02293	0.885613	1.18155	0.1218	0.09518	0.0292	0.771
AA_A_73_30018729	30018729	I	T	0.1975	0.2154	0.17	0.9319	0.992921	1.03065	0.1117	0.0971	0.454	1.12716	0.823902	1.54204	0.1315	0.1572	0.0808	-0.3746	0.2145	0.687564	0.451572	1.04689		t	i	0.1502	+-+	-16.8	0.1806	1.07101	0.975415	1.17597	0.160452	0.163599	0.636	0.962076	0.819683	1.12921	0.1322	0.149	0.816	0.977253	0.80506	1.18627	0.1432	0.1894	0.00728	1.324
AA_A_74_30018732	30018732	H	D	0.2961	0.2915	0.466	0.968303	0.997216	1.05585	0.289	0.3322	0.0107	0.761702	0.618081	0.938696	0.2564	0.2864	0.371	-0.1407	0.1574	0.86875	0.638136	1.1827		d	h	0.06837	+++	11.7	0.1039	1.07466	0.994595	1.16116	0.286338	0.277757	0.334	1.06798	0.934617	1.22036	0.2665	0.2831	0.706	0.971869	0.837806	1.12738	0.2885	0.2552	0.191	0.895
AA_A_76_30018738_A	30018738	P	A	0.095	0.0952	0.899	1.00868	1.00115	1.15221	0.0945	0.0937	0.587	0.913456	0.658674	1.26679	0.0247	0.0332	0.291	-0.4098	0.3876	0.663783	0.310523	1.41892		a	p	0.7989	-++	0	0.5057	1.01593	0.8995	1.14742	0.0994232	0.0946241	0.634	1.0529	0.851642	1.30172	0.047	0.0535	0.705	1.06079	0.781108	1.44061	0.09722	0.08384	0.1	0.803
AA_A_76_30018738_E	30018738	P	A	0.2229	0.2402	0.0476	0.909455	0.991125	0.999014	0.173	0.1794	0.645	0.944112	0.739454	1.20541	0.195	0.1768	0.754	0.0529	0.1688	1.05432	0.757336	1.46778		a	p	0.06193	++-	0	0.6876	1.08405	0.996036	1.17983	0.346804	0.368735	0.095	0.901368	0.797718	1.01849	0.1996	0.1964	0.817	0.979856	0.825113	1.16362	0.3494	0.3763	0.176	1.113
AA_A_76_30018738_V	30018738	A	P	0.3179	0.3354	0.0888	0.929675	0.993894	1.01113	0.2669	0.2725	0.482	0.927502	0.752147	1.14374	0.219	0.2094	0.882	-0.02403	0.16172	0.976256	0.711058	1.34036	99	a	p	0.0682	---	0	0.9571	0.932021	0.864109	1.00527	0.446181	0.463193	0.168	0.91871	0.814225	1.0366	0.2463	0.2495	0.998	1.00017	0.854362	1.17087	0.4466	0.4602	0.681	1.031
AA_A_77_30018741_D	30018741	A	P	0.3179	0.3354	0.0886	0.929629	0.99389	1.01108	0.2669	0.2725	0.481	0.927428	0.752087	1.14365	0.2192	0.2094	0.886	-0.02327	0.16169	0.976999	0.711641	1.3413	99	a	p	0.06817	---	0	0.9557	0.932021	0.864109	1.00527	0.446208	0.463635	0.16	0.917114	0.812789	1.03483	0.2463	0.2496	0.999	0.999935	0.854155	1.17059	NA	NA	NA	NA
AA_A_77_30018741_N	30018741	P	A	0.313	0.3284	0.141	0.938559	0.994661	1.02123	0.2525	0.2551	0.684	0.956877	0.773933	1.18307	0.2139	0.2043	0.976	-0.004824	0.162407	0.995188	0.723871	1.3682		a	p	0.1385	+++	0	0.9327	1.05929	0.981529	1.14321	0.446208	0.463635	0.16	0.917114	0.812789	1.03483	0.2417	0.2459	0.831	0.982796	0.837971	1.15265	NA	NA	NA	NA
AA_A_77_30018741_S	30018741	P	A	0.005	0.007	0.169	0.68764	0.819013	1.17193	0.0151	0.0179	0.27	0.676718	0.337926	1.35517	0.0058	0.0058	0.559	-0.48888	0.83637	0.613313	0.119056	3.15947		a	p	0.06383	+++	0	0.9915	1.47285	0.978002	2.21808	NA	NA	NA	NA	NA	NA	0.0049	0.0041	0.222	1.89772	0.678348	5.30898	NA	NA	NA	NA
AA_A_79_30018747	30018747	R	G	0.219	0.2358	0.0416	0.906404	0.990752	0.996287	0.1719	0.1788	0.647	0.944415	0.739473	1.20615	0.195	0.1768	0.753	0.05318	0.16879	1.05462	0.757563	1.46816		g	r	0.05556	++-	0	0.6724	1.08676	0.997942	1.18348	0.346632	0.368427	0.0989	0.902515	0.798797	1.0197	0.1977	0.1949	0.75	0.972462	0.818793	1.15497	0.3494	0.3763	0.176	1.113
AA_A_80_30018750	30018750	I	T	0.2191	0.2359	0.0415	0.906332	0.990744	0.996208	0.1719	0.1788	0.647	0.944415	0.739473	1.20615	0.195	0.1768	0.753	0.05318	0.16879	1.05462	0.757563	1.46816		t	i	0.05537	++-	0	0.672	1.08687	0.998042	1.1836	0.346632	0.368427	0.0989	0.902515	0.798797	1.0197	0.1977	0.1949	0.75	0.972462	0.818793	1.15497	0.3494	0.3763	0.176	1.113
AA_A_81_30018753	30018753	A	L	0.219	0.2358	0.0417	0.906422	0.990753	0.996307	0.1719	0.1788	0.647	0.944415	0.739473	1.20615	0.195	0.1768	0.753	0.05318	0.16879	1.05462	0.757563	1.46816	99	a	l	0.05561	--+	0	0.6725	0.920167	0.844965	1.00206	0.346632	0.368427	0.0989	0.902515	0.798797	1.0197	0.1977	0.1949	0.75	0.972456	0.818789	1.15496	0.3494	0.3763	0.176	1.113
AA_A_82_30018756	30018756	L	R	0.219	0.2358	0.0417	0.906413	0.990753	0.996297	0.1719	0.1788	0.647	0.944415	0.739473	1.20615	0.195	0.1768	0.753	0.05318	0.16879	1.05462	0.757563	1.46816	99	l	r	0.05558	--+	0	0.6724	0.920167	0.844965	1.00206	0.346632	0.368427	0.0989	0.902515	0.798797	1.0197	0.1977	0.1949	0.75	0.972456	0.818789	1.15496	0.3494	0.3763	0.176	1.113
AA_A_83_30018759	30018759	R	G	0.219	0.2358	0.0417	0.906413	0.990753	0.996297	0.1719	0.1788	0.647	0.944415	0.739473	1.20615	0.195	0.1768	0.753	0.05318	0.16879	1.05462	0.757563	1.46816		g	r	0.05558	++-	0	0.6724	1.08676	0.997942	1.18348	0.346632	0.368427	0.0989	0.902515	0.798797	1.0197	0.1977	0.1949	0.752	0.972651	0.818956	1.15519	0.3494	0.3763	0.176	1.113
AA_A_9_30018537_F	30018537	P	A	0.2474	0.2418	0.861	0.991915	0.999262	1.08629	0.3304	0.3708	0.0665	0.833952	0.686917	1.01246	0.2464	0.2877	0.0826	-0.2722	0.1568	0.761702	0.560163	1.03575		a	p	0.1757	+++	12.6	0.1014	1.05643	0.975626	1.14394	0.164062	0.165391	0.994	1.00059	0.854806	1.17123	0.245	0.2618	0.625	0.962076	0.8238	1.12356	0.1709	0.1545	0.379	0.915
AA_A_9_30018537_S	30018537	P	A	0.2544	0.2606	0.675	0.980973	0.998276	1.07315	0.2236	0.2252	0.757	1.03571	0.829673	1.29292	0.1987	0.1875	0.849	0.03173	0.16618	1.03224	0.745289	1.42967		a	p	0.8286	+--	0	0.8774	1.00894	0.930851	1.09358	0.346641	0.368418	0.0992	0.902601	0.798879	1.01979	0.2098	0.2216	0.181	0.891722	0.753962	1.05465	0.3494	0.3763	0.176	1.113
AA_A_9_30018537_T	30018537	P	A	0.2052	0.2213	0.28	0.94657	0.994542	1.04577	0.1162	0.1045	0.883	1.02276	0.757915	1.38014	0.1351	0.1661	0.0436	-0.4293	0.2127	0.650965	0.429046	0.987669		a	p	0.1614	+-+	-21.2	0.1921	1.06812	0.97393	1.17142	0.160398	0.163894	0.613	0.959593	0.817739	1.12605	0.1404	0.1557	0.949	0.993784	0.822041	1.20141	0.1432	0.1899	0.0062	1.332
AA_A_9_30018537_Y	30018537	P	A	0.2931	0.2764	0.123	1.07105	1.006	1.16864	0.3307	0.3007	0.154	1.15928	0.945872	1.42084	0.4213	0.3602	0.00933	0.3523	0.1355	1.42234	1.09059	1.85499		a	p	0.00815	---	4	0.1245	0.901586	0.835073	0.973396	0.328447	0.301797	0.0333	1.14801	1.0112	1.30334	0.4054	0.3617	0.122	1.1153	0.971196	1.28078	0.3365	0.2793	0.00183	0.77
AA_A_90_30018780	30018780	D	A	0.2108	0.2021	0.238	1.05968	1.00559	1.16671	0.2989	0.2486	0.0178	1.29059	1.0452	1.5936	0.3962	0.343	0.0358	0.2866	0.1365	1.33189	1.01924	1.74044		a	d	0.009073	---	13.3	0.09949	0.895118	0.823737	0.972684	0.233163	0.216676	0.124	1.11877	0.969984	1.29038	0.3674	0.3213	0.268	1.08303	0.940515	1.24713	0.2468	0.2006	0.00176	0.748
AA_A_95_30019036_I	30019036	A	P	0.5099	0.5201	0.0253	0.911276	0.992468	0.988535	0.4476	0.4929	0.0174	0.786628	0.645478	0.958644	0.4453	0.4575	0.659	-0.06077	0.13763	0.94104	0.718547	1.23243	99	a	p	0.002847	---	0	0.3758	0.895476	0.832835	0.962828	0.601772	0.613349	0.457	0.955571	0.847653	1.07723	0.4593	0.4739	0.462	0.951316	0.832922	1.08654	0.3932	0.3953	0.712	0.971
AA_A_95_30019036_L	30019036	P	A	0.214	0.2288	0.0735	0.916466	0.991703	1.00832	0.1574	0.1614	0.913	0.986058	0.765735	1.26977	0.1899	0.1717	0.662	0.07447	0.17014	1.07731	0.77182	1.50372		a	p	0.1232	++-	0	0.597	1.07026	0.981827	1.16665	0.346632	0.368427	0.0989	0.902515	0.798797	1.0197	0.1931	0.1913	0.582	0.952203	0.799851	1.13357	0.3494	0.3763	0.176	1.113
AA_A_95_30019036_V	30019036	P	A	0.2958	0.2913	0.463	0.96811	0.997201	1.05557	0.2908	0.332	0.0142	0.769973	0.624792	0.948888	0.2561	0.2865	0.365	-0.1426	0.1573	0.867101	0.637049	1.18023		a	p	0.07309	+++	3.9	0.1248	1.07326	0.993303	1.15965	0.255134	0.244932	0.319	1.07112	0.935972	1.22578	0.2664	0.283	0.71	0.972207	0.838151	1.1277	0.2575	0.2283	0.258	0.905
AA_A_97_30019042_I	30019042	P	A	0.1978	0.1701	5.17e-05	1.23015	1.02099	1.35993	0.3744	0.3385	0.0292	1.2452	1.02237	1.51661	0.3965	0.3537	0.0716	0.2456	0.1364	1.27839	0.978491	1.6702		a	p	8.214e-07	---	0	0.9636	0.807914	0.742177	0.879473	0.111052	0.0988877	0.146	1.15383	0.952162	1.39821	0.3474	0.3292	0.813	1.01723	0.883263	1.17152	0.125	0.1005	0.0389	0.784
AA_A_97_30019042_M	30019042	P	A	0.4271	0.4585	0.0137	0.905272	0.992156	0.979812	0.2983	0.2961	0.793	0.972651	0.790834	1.19627	0.333	0.3439	0.276	-0.1628	0.1494	0.849761	0.634052	1.13886		a	p	0.009591	+++	0	0.7318	1.09933	1.02323	1.18109	0.507105	0.532416	0.0494	0.889279	0.790999	0.99977	0.3409	0.3531	0.787	0.980486	0.85002	1.13098	0.5075	0.4342	0.000673	0.77
AA_A_97_30019042_R	30019042	P	A	0.375	0.3714	0.506	0.972311	0.997681	1.05613	0.3285	0.3665	0.0411	0.810746	0.662926	0.991528	0.2717	0.3038	0.349	-0.1457	0.1556	0.864417	0.637197	1.17266		a	p	0.1146	+++	-33.2	0.2228	1.06152	0.985522	1.14337	0.381872	0.369031	0.269	1.07067	0.948533	1.20853	0.3121	0.3186	0.996	0.999609	0.866542	1.15311	0.3835	0.334	0.0229	0.834
AA_A_99_30019048_C	30019048	P	A	0.0393	0.0359	0.621	1.05361	1.01085	1.29558	0.0383	0.0585	0.0317	0.59458	0.370012	0.955443	0.085	0.0992	0.622	-0.1141	0.2315	0.892169	0.566748	1.40444		a	p	0.5733	-++	16.4	0.09135	1.05159	0.88291	1.25249	0.0321598	0.0385852	0.0737	0.747999	0.541192	1.03383	0.0771	0.0797	0.272	0.86956	0.677749	1.11566	0.03953	0.03821	0.642	0.914
AA_A_99_30019048_F	30019048	P	A	0.2142	0.229	0.0713	0.915798	0.991627	1.00766	0.1578	0.1626	0.847	0.975388	0.757137	1.25655	0.1901	0.1725	0.675	0.07135	0.17022	1.07396	0.769295	1.49927		a	p	0.1125	++-	0	0.6229	1.0724	0.9836	1.16922	0.348668	0.370097	0.102	0.903073	0.799006	1.02069	0.1937	0.1924	0.567	0.950239	0.798034	1.13147	0.3494	0.3763	0.176	1.113
AA_A_99_30019048_Y	30019048	A	P	0.2534	0.2648	0.131	0.932179	0.993625	1.02105	0.1955	0.2205	0.218	0.863985	0.684781	1.09009	0.2745	0.271	0.963	0.006891	0.146485	1.00691	0.755618	1.34179	99	a	p	0.0771	--+	0	0.7111	0.929322	0.856724	1.00807	0.380829	0.408677	0.0227	0.870352	0.772099	0.981108	0.2706	0.2717	0.249	0.91407	0.784646	1.06484	0.3889	0.4145	0.247	1.094
AA_B_-10_31432871_A	31432871	P	A	0.1791	0.1611	0.033	1.11878	1.01165	1.2404	0.2307	0.2244	0.917	0.987854	0.785879	1.24174	0.3047	0.2873	0.535	0.0883	0.1423	1.09232	0.826456	1.4437		a	p	0.04563	-+-	0	0.6233	0.913109	0.835203	0.998281	0.21075	0.183122	0.0915	1.1356	0.98015	1.31571	0.2716	0.2812	0.154	0.896602	0.771792	1.0416	0.1955	0.1885	0.46	0.93
AA_B_-10_31432871_G	31432871	A	P	0.1798	0.1616	0.0319	1.11958	1.01173	1.24131	0.2339	0.2272	0.994	1.00091	0.797362	1.25643	0.3062	0.2881	0.501	0.09554	0.1421	1.10025	0.832788	1.45362	99	a	p	0.03858	+++	0	0.6792	1.09856	1.00503	1.2008	0.212219	0.184097	0.0797	1.14127	0.984947	1.32241	0.2725	0.2818	0.152	0.896189	0.771357	1.04122	0.1955	0.1885	0.46	0.93
AA_B_103_31432162	31432162	L	V	0.2721	0.271	0.483	1.03236	1.00284	1.12848	0.2552	0.2729	0.247	0.879677	0.70796	1.09305	0.3243	0.315	0.659	0.06303	0.14271	1.06506	0.805186	1.4088	99	l	v	0.7443	+-+	0	0.3831	1.01319	0.936236	1.09646	0.221137	0.230829	0.638	0.966172	0.837169	1.11505	0.2949	0.3038	0.503	0.95054	0.819311	1.10279	0.2404	0.2142	0.201	0.891
AA_B_11_31432683	31432683	S	A	0.293	0.2599	0.000325	1.17012	1.01355	1.27479	0.2474	0.25	0.821	1.02621	0.820144	1.28405	0.1874	0.1609	0.213	0.2227	0.1788	1.24945	0.880075	1.77384		a	s	0.0002842	---	0	0.509	0.865455	0.800509	0.93567	0.332838	0.259205	2.05e-06	1.36571	1.201	1.55301	0.2231	0.2054	0.264	1.10043	0.930361	1.30158	0.265	0.2469	0.232	0.901
AA_B_-11_31432874_S	31432874	P	A	0.3488	0.3523	0.221	0.949424	0.995694	1.03174	0.4579	0.4434	0.814	1.02374	0.842416	1.24409	0.519	0.5481	0.329	-0.1354	0.1388	0.873366	0.665346	1.14642		a	p	0.2083	+-+	0	0.631	1.04844	0.973949	1.12862	0.36409	0.342783	0.364	1.0586	0.936289	1.19688	0.4998	0.5059	0.0636	0.879529	0.767987	1.00727	0.3718	0.3458	0.113	0.884
AA_B_-11_31432874_W	31432874	A	P	0.3495	0.3529	0.225	0.949794	0.995726	1.03214	0.4612	0.4461	0.74	1.03354	0.850582	1.25585	0.5205	0.5489	0.356	-0.1279	0.1386	0.879941	0.670618	1.1546	99	a	p	0.2303	-+-	0	0.6075	0.955902	0.887989	1.02901	0.36559	0.343805	0.342	1.06129	0.938938	1.19959	0.5006	0.5064	0.0635	0.879388	0.767761	1.00724	0.375	0.3458	0.0797	0.873
AA_B_113_31432132	31432132	Y	H	0.1408	0.1583	0.0497	0.891714	0.986965	0.999874	0.0956	0.0947	0.934	1.01422	0.725209	1.41841	0.1052	0.1224	0.267	-0.23	0.2074	0.794534	0.529139	1.19304		h	y	0.03996	+-+	0	0.6482	1.11594	1.00505	1.23907	0.050182	0.0763193	0.000319	0.637103	0.49445	0.820912	0.1173	0.1084	0.572	0.939273	0.755882	1.16716	0.05342	0.1197	7.67e-08	2.336
AA_B_114_31432129_D	31432129	P	A	0.4262	0.4634	0.000228	0.861629	0.988276	0.932631	0.4443	0.4139	0.116	1.16801	0.962246	1.41777	0.3761	0.4272	0.0776	-0.245	0.1389	0.782705	0.596161	1.02762		a	p	0.001473	+-+	55.8	0.01081	1.12165	1.04503	1.20389	0.342919	0.373893	0.0586	0.887896	0.784699	1.00466	0.4307	0.4077	0.605	1.03739	0.902733	1.19212	0.3739	0.4185	0.0333	1.181
AA_B_114_31432129_H	31432129	P	A	0.0268	0.0264	0.794	1.03286	1.00788	1.31666	0.0052	0.0157	0.0597	0.334975	0.107306	1.04568	0.0158	0.0211	0.448	-0.3796	0.5008	0.684135	0.256361	1.82571		a	p	0.7552	-++	2.2	0.1293	1.03738	0.823664	1.30655	NA	NA	NA	NA	NA	NA	0.0249	0.0288	0.441	0.850758	0.564088	1.28312	0.001068	0.0002316	0.506	0.39
AA_B_114_31432129_N	31432129	P	A	0.5464	0.5098	0.000334	1.15574	1.01151	1.25085	0.5517	0.5723	0.227	0.887701	0.731735	1.07691	0.6108	0.5526	0.0426	0.2801	0.1382	1.32326	1.00927	1.73494		a	p	0.000996	-+-	47.4	0.02237	0.888074	0.827409	0.953187	0.656078	0.625465	0.0617	1.12454	0.993961	1.27226	0.5475	0.5667	0.792	0.981626	0.855182	1.12677	0.3739	0.4185	0.0333	1.181
AA_B_116_31432123_D	31432123	P	A	0.1159	0.1311	0.0723	0.89366	0.986311	1.01022	0.042	0.0502	0.621	0.884971	0.544927	1.43721	0.0215	0.0266	0.424	-0.3506	0.4382	0.704265	0.298355	1.66242		a	p	0.05049	+++	0	0.8651	1.12468	0.999704	1.26528	0.0455347	0.0719073	0.000299	0.622727	0.477474	0.812166	0.0502	0.0474	0.205	1.22831	0.893533	1.68851	0.04915	0.1144	7.95e-08	2.406
AA_B_116_31432123_F	31432123	P	A	0.0728	0.0568	0.000466	1.325	1.04535	1.55118	0.1049	0.1113	0.71	0.941887	0.68694	1.29145	0.1183	0.0895	0.371	0.1964	0.2193	1.21701	0.791815	1.87054		a	p	0.001959	-+-	-11.1	0.1653	0.809207	0.707679	0.925301	0.0795427	0.0639152	0.264	1.14138	0.906097	1.43776	0.0992	0.084	0.555	1.07628	0.843444	1.37338	0.05662	0.05628	0.685	1.068
AA_B_116_31432123_L	31432123	P	A	0.1384	0.1435	0.506	0.962135	0.995622	1.07795	0.1499	0.1782	0.0816	0.794375	0.613048	1.02933	0.1812	0.1612	0.337	0.1667	0.1735	1.1814	0.840835	1.6599		a	p	0.3318	++-	-15.7	0.1776	1.05054	0.950975	1.16052	0.119105	0.142239	0.0208	0.811311	0.678318	0.97038	0.159	0.165	0.721	0.967162	0.805096	1.16185	0.1496	0.1339	0.445	0.921
AA_B_116_31432123_S	31432123	P	A	0.3039	0.3188	0.0781	0.925964	0.993439	1.00869	0.354	0.3237	0.217	1.13826	0.926901	1.39781	0.363	0.4129	0.104	-0.2259	0.1389	0.797798	0.607657	1.04743		a	p	0.1191	+-+	17.5	0.08864	1.06216	0.984568	1.14586	0.25975	0.255377	0.601	1.03669	0.905921	1.18633	0.3827	0.3719	0.298	0.926666	0.802724	1.06975	0.2906	0.2487	0.00937	0.802
AA_B_116_31432123_Y	31432123	P	A	0.3693	0.3499	0.0877	1.07443	1.00593	1.16671	0.3517	0.3404	0.578	1.0578	0.867634	1.28964	0.3206	0.3109	0.497	0.0954	0.1406	1.1001	0.835123	1.44915		a	p	0.05663	---	0	0.9744	0.931182	0.865365	1.00201	0.494652	0.465123	0.0247	1.14445	1.01728	1.28753	0.3148	0.338	0.715	1.02758	0.887969	1.18914	0.4583	0.4477	0.411	0.938
AA_B_12_31432680	31432680	V	M	0.293	0.2599	0.000331	1.16988	1.01353	1.27452	0.2474	0.25	0.821	1.0262	0.820136	1.28403	0.1875	0.1609	0.213	0.2228	0.1788	1.24957	0.880163	1.77402		m	v	0.000289	---	0	0.5095	0.865628	0.800669	0.935858	0.333088	0.259368	2.02e-06	1.36592	1.20122	1.55321	0.2231	0.2054	0.264	1.10043	0.930361	1.30158	0.265	0.2469	0.232	0.901
AA_B_131_31432078	31432078	R	S	0.2394	0.2202	0.0412	1.10127	1.00897	1.2081	0.2371	0.221	0.56	1.06985	0.852347	1.34286	0.2395	0.2309	0.375	0.1379	0.1554	1.14786	0.846467	1.55657	99	r	s	0.02308	+++	0	0.9356	1.10043	1.01327	1.19508	0.310065	0.249112	1.99e-05	1.32793	1.16598	1.51237	0.234	0.266	0.143	0.889902	0.761209	1.04035	0.2981	0.2464	0.000241	0.732
AA_B_143_31432042	31432042	S	T	0.0708	0.0773	0.11	0.883415	0.981332	1.02845	0.1002	0.1066	0.204	0.817013	0.598254	1.11576	0.1956	0.1915	0.71	0.06066	0.16328	1.06254	0.771538	1.46329		t	s	0.09146	++-	0	0.482	1.11427	0.982715	1.26344	0.0982628	0.0766682	0.0215	1.27593	1.03808	1.56827	0.1628	0.1887	0.011	0.798451	0.671201	0.949825	0.1111	0.0843	0.00224	0.677
AA_B_145_31432036	31432036	L	R	0.0505	0.0481	0.367	1.08744	1.01538	1.30455	0.1065	0.1198	0.564	0.915385	0.677618	1.23658	0.1179	0.1035	0.323	0.2131	0.2156	1.23751	0.811009	1.8883	99	l	r	0.4316	+-+	0	0.4712	1.06035	0.916113	1.2273	NA	NA	NA	NA	NA	NA	0.0858	0.0759	0.27	1.15189	0.896088	1.48073	0.02885	0.01227	0.0034	0.47
AA_B_147_31432030	31432030	L	W	0.0708	0.0773	0.109	0.883115	0.981282	1.02811	0.1001	0.1066	0.203	0.81685	0.598134	1.11554	0.1956	0.1916	0.711	0.06046	0.16327	1.06233	0.771399	1.46297	99	l	w	0.09059	--+	0	0.4818	0.897179	0.791254	1.01728	0.0982662	0.076673	0.0215	1.27586	1.03804	1.56817	0.1628	0.1887	0.011	0.798429	0.671183	0.9498	0.1111	0.0843	0.00224	0.677
AA_B_152_31432015	31432015	E	V	0.3468	0.3683	0.00182	0.875106	0.988873	0.951666	0.3935	0.3838	0.417	1.08604	0.889927	1.32538	0.3265	0.3794	0.0607	-0.26818	0.14299	0.76477	0.57785	1.01215	99	e	v	0.00303	-+-	21.7	0.07775	0.893419	0.829294	0.962501	0.381404	0.430568	0.00417	0.840102	0.7454	0.946837	0.3557	0.3498	0.425	1.06029	0.918386	1.22412	0.3953	0.4252	0.086	1.142
AA_B_156_31432003_D	31432003	P	A	0.0375	0.0354	0.383	1.096	1.01907	1.34682	0.0528	0.0432	0.367	1.22716	0.786609	1.91444	0.0135	0.0074	0.406	0.5665	0.6817	1.76209	0.463183	6.70351		a	p	0.2026	---	0	0.7258	0.886566	0.736666	1.06697	NA	NA	NA	NA	NA	NA	0.0126	0.0219	0.222	0.708639	0.407808	1.23139	0.007479	0.01019	0.564	1.281
AA_B_156_31432003_L	31432003	A	P	0.2263	0.2472	0.00188	0.861164	0.986013	0.946264	0.2757	0.2551	0.601	1.06097	0.849903	1.32444	0.1617	0.1848	0.53	-0.115	0.1832	0.891366	0.622462	1.27644	99	a	p	0.006335	-+-	-38.9	0.237	0.889229	0.817356	0.967422	0.178417	0.202826	0.00855	0.8168	0.701549	0.950985	0.1988	0.213	0.929	1.00775	0.849652	1.19527	0.2062	0.2063	0.932	0.992
AA_B_156_31432003_R	31432003	P	A	0.0387	0.0423	0.261	0.892204	0.977593	1.08831	0.0403	0.0321	0.346	1.28018	0.76544	2.14107	0.0099	0.0125	0.814	0.1569	0.6677	1.16988	0.31607	4.33011		a	p	0.5026	+--	0	0.4152	1.06481	0.886339	1.27923	0.0386803	0.0472242	0.198	0.82776	0.61876	1.10735	0.0188	0.0212	0.551	1.16872	0.699986	1.95132	0.03632	0.05581	0.0199	1.583
AA_B_156_31432003_W	31432003	P	A	0.1503	0.1695	0.000646	0.82515	0.979001	0.92149	0.1835	0.1819	0.66	0.94315	0.726452	1.22449	0.1407	0.1659	0.363	-0.176	0.1935	0.838618	0.573923	1.22539		a	p	0.0005915	+++	0	0.6523	1.18792	1.07681	1.31048	0.132315	0.146299	0.068	0.852023	0.716498	1.01318	0.1697	0.1731	0.822	1.02131	0.850079	1.22704	0.1645	0.1408	0.0814	0.836
AA_B_158_31431997	31431997	T	A	0.0533	0.0345	1.89e-06	1.56728	1.08659	1.88542	0.0631	0.0578	0.529	1.13758	0.761915	1.69846	0.1023	0.0795	0.433	0.185	0.2362	1.20322	0.757333	1.91162		a	t	4.57e-06	---	-47.5	0.2578	0.691425	0.590503	0.809596	0.0762833	0.0609232	0.212	1.16152	0.919236	1.46765	0.086	0.0671	0.418	1.11625	0.855386	1.45666	0.05235	0.05095	0.784	1.047
AA_B_-16_31432889_L	31432889	P	A	0.3845	0.3863	0.796	1.01077	1.00087	1.09612	0.3094	0.3288	0.443	0.922415	0.750268	1.13406	0.254	0.2148	0.102	0.2535	0.1548	1.28853	0.951317	1.74527		a	p	0.7207	-+-	-24.7	0.2011	0.986689	0.916948	1.06173	0.345305	0.34692	0.752	0.980131	0.865541	1.10989	0.2845	0.2834	0.501	1.05325	0.90567	1.22488	0.3665	0.3673	0.986	1.001
AA_B_-16_31432889_V	31432889	A	P	0.3852	0.3869	0.787	1.01124	1.00091	1.0967	0.3126	0.3316	0.506	0.932254	0.758316	1.14609	0.2554	0.2155	0.0898	0.2629	0.155	1.3007	0.959925	1.76244	99	a	p	0.6768	+-+	-24.2	0.2	1.01572	0.943929	1.09298	0.346448	0.3476	0.786	0.982885	0.867833	1.11319	0.2853	0.2839	0.5	1.05331	0.905729	1.22494	0.3665	0.3673	0.986	1.001
AA_B_163_31431982_E	31431982	P	A	0.3092	0.2927	0.0822	1.0777	1.00634	1.1726	0.3311	0.3438	0.625	0.951524	0.779823	1.16103	0.369	0.3514	0.221	0.169	0.1381	1.18412	0.903322	1.5522		a	p	0.0907	-+-	0	0.3877	0.937536	0.870075	1.01023	0.317056	0.261522	8.6e-05	1.29592	1.13892	1.47457	0.3416	0.3642	0.376	0.938811	0.816366	1.07962	0.3173	0.2585	8.34e-05	0.719
AA_B_163_31431982_L	31431982	A	P	0.4643	0.4367	0.00686	1.11442	1.00854	1.20547	0.4823	0.4924	0.461	0.930094	0.76698	1.1279	0.5413	0.4853	0.0345	0.2918	0.138	1.33884	1.02155	1.75467	99	a	p	0.006962	+-+	20.6	0.08047	1.10153	1.02689	1.1816	0.503871	0.450858	0.00588	1.18018	1.04881	1.328	0.5173	0.531	0.167	0.908192	0.792129	1.04126	0.4957	0.4312	0.000513	0.765
AA_B_163_31431982_T	31431982	P	A	0.1551	0.144	0.116	1.09411	1.01013	1.22384	0.1518	0.1495	0.707	0.950982	0.731552	1.23623	0.1736	0.1343	0.187	0.26045	0.19715	1.29751	0.881647	1.90954		a	p	0.1105	-+-	0	0.4036	0.922101	0.834712	1.01864	0.186765	0.189293	0.296	0.92203	0.791497	1.07409	0.1768	0.1684	0.454	0.931196	0.772571	1.12239	0.1795	0.173	0.977	1.003
AA_B_167_31431970_S	31431970	P	A	0.0886	0.1043	0.0292	0.857864	0.979097	0.984598	0.0371	0.035	0.644	1.13508	0.662775	1.94395	0.0078	0.0063	0.912	0.09747	0.88107	1.10238	0.196042	6.19887		a	p	0.0473	+--	0	0.5926	1.14419	1.00162	1.30706	0.0445956	0.0711751	0.000295	0.622479	0.477295	0.811825	0.0267	0.0204	0.00915	1.88462	1.17021	3.0352	NA	NA	NA	NA
AA_B_167_31431970_W	31431970	A	P	0.0888	0.1045	0.0303	0.858808	0.979249	0.985662	0.0371	0.035	0.644	1.13508	0.662775	1.94395	0.0071	0.006	0.947	-0.0581	0.8723	0.943556	0.170707	5.21536	99	a	p	0.04743	-+-	0	0.6137	0.874065	0.76515	0.998485	0.0445956	0.0711751	0.000295	0.622479	0.477295	0.811825	0.0269	0.0205	0.00909	1.88517	1.17079	3.03545	NA	NA	NA	NA
AA_B_171_31431958	31431958	H	Y	0.1265	0.1262	0.956	0.996575	0.999587	1.12404	0.1195	0.1189	0.439	1.12412	0.835648	1.51217	0.0845	0.0637	0.333	0.2618	0.2703	1.29927	0.764917	2.2069	99	h	y	0.6647	-++	0	0.5088	1.02439	0.918446	1.14256	0.185869	0.219605	0.0304	0.850895	0.734483	0.985758	0.0863	0.0673	0.000581	1.61313	1.22844	2.11829	0.1624	0.2063	0.00143	1.388
AA_B_177_31431940	31431940	D	E	0.1169	0.1214	0.275	0.934812	0.991873	1.0551	0.1569	0.1476	0.848	0.97454	0.748925	1.26812	0.206	0.2071	0.767	0.04686	0.15835	1.04798	0.768353	1.42936	99	d	e	0.362	--+	0	0.7847	0.952943	0.859088	1.05705	0.136935	0.123882	0.26	1.10485	0.92932	1.31354	0.1847	0.2129	0.0304	0.831451	0.703473	0.98271	0.1464	0.1399	0.315	0.894
AA_B_178_31431937	31431937	K	T	0.1093	0.1194	0.0454	0.881359	0.9845	0.997409	0.1401	0.1371	0.566	0.923153	0.702586	1.21297	0.2043	0.2037	0.706	0.06027	0.15955	1.06212	0.776897	1.45207		t	k	0.07035	++-	0	0.5483	1.10285	0.991897	1.22622	0.136947	0.123896	0.26	1.10482	0.929307	1.31347	0.18	0.2082	0.0236	0.822927	0.695113	0.974242	0.1464	0.1399	0.315	0.894
AA_B_180_31431931	31431931	E	Q	0.1169	0.1214	0.275	0.93484	0.991877	1.05514	0.1569	0.1476	0.848	0.974657	0.74903	1.26825	0.206	0.2071	0.767	0.04688	0.15835	1.048	0.768368	1.42939	99	e	q	0.3625	--+	0	0.7846	0.952943	0.859088	1.05705	0.136928	0.123873	0.26	1.10489	0.929343	1.3136	0.1847	0.2129	0.0304	0.831408	0.703439	0.982656	0.1464	0.1399	0.315	0.894
AA_B_194_31431315_I	31431315	A	P	0.266	0.259	0.231	1.05595	1.00486	1.15424	0.2276	0.2274	0.895	1.01547	0.808259	1.2758	0.2252	0.2345	0.571	-0.09887	0.17451	0.90586	0.643451	1.27528	99	a	p	0.318	++-	0	0.6776	1.04196	0.961312	1.12937	0.289851	0.309718	0.526	0.959112	0.84297	1.09126	0.2147	0.212	0.154	1.12654	0.956165	1.32727	NA	NA	NA	NA
AA_B_194_31431315_V	31431315	P	A	0.2659	0.2589	0.231	1.05598	1.00486	1.15432	0.2274	0.2272	0.896	1.01534	0.808138	1.27566	0.2252	0.2345	0.571	-0.09898	0.17451	0.905761	0.64338	1.27514		a	p	0.3183	--+	0	0.6769	0.959829	0.885541	1.04035	0.289851	0.309718	0.526	0.959112	0.84297	1.09126	0.2143	0.2116	0.152	1.12748	0.956645	1.32882	NA	NA	NA	NA
AA_B_199_31431300_A	31431300	A	P	0.0886	0.1044	0.0292	0.857881	0.9791	0.984618	0.0357	0.0322	0.573	1.17163	0.675858	2.03109	0.0068	0.006	0.894	-0.1165	0.8708	0.89003	0.161497	4.90506	99	a	p	0.04742	-+-	0	0.5597	0.873891	0.764847	0.998481	0.0450671	0.0716969	0.000264	0.61992	0.475175	0.808756	0.0268	0.0205	0.00977	1.87303	1.16361	3.01498	NA	NA	NA	NA
AA_B_199_31431300_V	31431300	P	A	0.0885	0.1043	0.0294	0.858018	0.979124	0.984756	0.0355	0.032	0.575	1.17046	0.675183	2.02906	0.0069	0.0062	0.88	-0.1313	0.8704	0.876955	0.159249	4.82922		a	p	0.04739	+-+	0	0.5622	1.14431	1.00152	1.30745	0.0450671	0.0716969	0.000264	0.61992	0.475175	0.808756	0.0267	0.0204	0.00954	1.87826	1.16613	3.02526	NA	NA	NA	NA
AA_B_-21_31432904_M	31432904	P	A	0.1355	0.1199	0.0371	1.13064	1.01427	1.26897	0.146	0.145	0.888	1.01969	0.777885	1.33666	0.1204	0.1148	0.854	0.03837	0.20902	1.03912	0.689831	1.56526		a	p	0.05045	---	0	0.7505	0.902488	0.8144	1.0001	0.15263	0.127528	0.0583	1.17754	0.995063	1.39349	0.1273	0.109	0.145	1.1695	0.947548	1.44345	0.11	0.1336	0.0568	1.256
AA_B_-21_31432904_T	31432904	A	P	0.1361	0.1205	0.0359	1.13152	1.01436	1.26996	0.1492	0.1478	0.786	1.03801	0.793386	1.35807	0.1219	0.1155	0.794	0.05437	0.20841	1.05588	0.701795	1.5886	99	a	p	0.0418	+++	0	0.8183	1.11249	1.0039	1.23282	0.154407	0.128912	0.0533	1.1806	0.998439	1.39599	0.1282	0.1095	0.144	1.16987	0.947833	1.44392	0.11	0.1336	0.0568	1.256
AA_B_-23_31432910_L	31432910	P	A	0.1355	0.1199	0.0368	1.13087	1.0143	1.26924	0.1459	0.1448	0.878	1.0215	0.779111	1.33929	0.1205	0.1147	0.849	0.03996	0.20915	1.04077	0.690752	1.56815		a	p	0.04927	---	0	0.7574	0.902037	0.813993	0.999604	0.152585	0.127504	0.0585	1.1774	0.994915	1.39336	0.1273	0.109	0.145	1.16961	0.947627	1.44358	0.11	0.1336	0.0568	1.256
AA_B_-23_31432910_R	31432910	A	P	0.1361	0.1205	0.0359	1.13146	1.01436	1.26987	0.1491	0.1478	0.788	1.0376	0.793022	1.35761	0.1219	0.1155	0.794	0.05437	0.20841	1.05588	0.701795	1.5886	99	a	p	0.04195	+++	0	0.8173	1.11238	1.0038	1.2327	0.154267	0.128831	0.0542	1.1798	0.997764	1.39504	0.1282	0.1095	0.144	1.16987	0.947835	1.44392	0.11	0.1336	0.0568	1.256
AA_B_24_31432644_A	31432644	A	P	0.4931	0.4668	0.00325	1.12487	1.00926	1.21656	0.5199	0.518	0.576	1.05659	0.871022	1.2817	0.4943	0.4498	0.101	0.2174	0.1327	1.24284	0.958206	1.61203	99	a	p	0.001077	+++	0	0.6164	1.12378	1.04784	1.20523	0.464819	0.414322	0.0022	1.20396	1.06898	1.356	0.4866	0.4847	0.965	0.99695	0.871226	1.1408	0.4605	0.4504	0.354	0.932
AA_B_24_31432644_S	31432644	P	A	0.1638	0.1495	0.0822	1.09933	1.01016	1.22321	0.2009	0.1958	0.549	1.0768	0.845593	1.37121	0.1423	0.1237	0.522	0.1268	0.1981	1.13519	0.769914	1.67377		a	p	0.05321	---	0	0.9735	0.910829	0.828558	1.00127	0.182519	0.149589	0.00727	1.24295	1.06126	1.45575	0.1543	0.1365	0.519	1.0662	0.877422	1.2956	0.1485	0.1614	0.333	1.108
AA_B_24_31432644_T	31432644	P	A	0.3295	0.3174	0.0658	1.08277	1.00676	1.17849	0.3196	0.324	0.977	1.00297	0.819383	1.2277	0.353	0.3262	0.191	0.1832	0.1401	1.20105	0.912656	1.58059		a	p	0.04542	---	0	0.579	0.926168	0.859188	0.998369	0.282135	0.264631	0.237	1.08335	0.948975	1.23675	0.3331	0.349	0.609	0.963945	0.837516	1.10946	0.313	0.289	0.0694	0.864
AA_B_245_31431162_A	31431162	A	P	0.0313	0.0379	0.0336	0.787084	0.948484	0.981662	0.0282	0.045	0.0626	0.610425	0.363057	1.02634	0.0112	0.0207	0.42	-0.4573	0.5665	0.63299	0.208537	1.92137	99	a	p	0.005355	---	0	0.6456	0.752691	0.616301	0.919266	0.042157	0.0228206	0.00021	1.8858	1.3528	2.6288	0.0196	0.019	0.525	1.1802	0.708519	1.9659	NA	NA	NA	NA
AA_B_245_31431162_T	31431162	P	A	0.0312	0.0378	0.0335	0.786919	0.948444	0.981436	0.0282	0.045	0.0626	0.610425	0.363057	1.02634	0.0111	0.0206	0.421	-0.4571	0.5684	0.633117	0.207803	1.92893		a	p	0.005337	+++	0	0.6463	1.32883	1.08804	1.62291	0.042157	0.0228206	0.00021	1.8858	1.3528	2.6288	0.0189	0.0182	0.505	1.18932	0.714319	1.98018	NA	NA	NA	NA
AA_B_282_31430958_I	31430958	A	P	0.4532	0.4318	0.0139	1.10441	1.00789	1.19539	0.454	0.4475	0.554	1.05896	0.875992	1.28015	0.4749	0.4323	0.146	0.1951	0.1342	1.21543	0.934324	1.58112	99	a	p	0.005189	+++	0	0.7057	1.10561	1.03049	1.18621	0.440466	0.394056	0.00769	1.17554	1.04373	1.32399	0.453	0.4449	0.438	1.05538	0.921085	1.20926	0.4124	0.4231	0.831	1.017
AA_B_282_31430958_V	31430958	P	A	0.4515	0.4301	0.0144	1.1036	1.00782	1.19431	0.4525	0.446	0.561	1.05779	0.875191	1.27848	0.4746	0.4321	0.148	0.1943	0.1342	1.21446	0.933577	1.57985		a	p	0.005469	---	0	0.7046	0.905199	0.843861	0.970997	0.440427	0.393928	0.00762	1.17583	1.04395	1.32438	0.452	0.4437	0.423	1.05713	0.922671	1.21119	0.4124	0.4231	0.831	1.017
AA_B_30_31432626	31432626	G	D	0.0008	0.0003	0.317	2.4646	4.92598	14.4361	0.0122	0.0088	0.267	1.69537	0.667329	4.30713	0.0099	0.0019	0.122	2.1098	1.3631	8.24659	0.570138	119.28	99	g	d	0.06573	+++	0	0.5377	2.09573	0.953115	4.60812	NA	NA	NA	NA	NA	NA	0.0187	0.0066	0.575	1.25545	0.566483	2.78236	NA	NA	NA	NA
AA_B_305_31430889_A	31430889	P	A	0.4596	0.4361	0.00664	1.11536	1.00864	1.20685	0.4574	0.4522	0.697	1.03859	0.858311	1.25673	0.4816	0.4424	0.152	0.1921	0.134	1.21179	0.93189	1.57576		a	p	0.003242	---	0	0.6346	0.899964	0.83898	0.965381	0.439928	0.393051	0.00711	1.1778	1.04548	1.32686	0.4601	0.4521	0.487	1.04925	0.916203	1.20162	0.4135	0.4231	0.875	1.012
AA_B_305_31430889_T	31430889	A	P	0.4614	0.4379	0.00645	1.11616	1.00873	1.20799	0.4588	0.4537	0.689	1.0398	0.859147	1.25844	0.4818	0.4426	0.15	0.1928	0.134	1.21264	0.932543	1.57687	99	a	p	0.003097	+++	0	0.637	1.11204	1.03649	1.19311	0.440618	0.394051	0.00754	1.17606	1.04415	1.32462	0.461	0.4533	0.502	1.04756	0.91467	1.19976	0.4135	0.4231	0.875	1.012
AA_B_32_31432620	31432620	L	Q	0.2815	0.2703	0.0964	1.07731	1.00656	1.17619	0.2087	0.2049	0.764	1.03627	0.821028	1.30795	0.2388	0.2232	0.399	0.1318	0.1564	1.14088	0.839672	1.55014	99	l	q	0.06835	+++	0	0.8865	1.07659	0.994436	1.16553	0.276465	0.253006	0.14	1.10507	0.967837	1.26175	0.2493	0.2745	0.225	0.909193	0.779559	1.06038	0.2853	0.277	0.305	0.918
AA_B_325_31430282_C	31430282	P	A	0.3954	0.3885	0.399	1.03508	1.00277	1.12152	0.3953	0.3984	0.979	1.00255	0.827465	1.21469	0.3777	0.3631	0.339	0.1307	0.1367	1.13963	0.871768	1.48979		a	p	0.3108	---	0	0.7418	0.963773	0.897409	1.03504	0.365287	0.332291	0.0265	1.15057	1.01661	1.30218	0.373	0.3862	0.906	1.00838	0.877492	1.1588	0.3739	0.3761	0.675	0.968
AA_B_325_31430282_S	31430282	A	P	0.397	0.3901	0.399	1.03522	1.00279	1.12184	0.3969	0.4002	0.981	1.00239	0.827248	1.21462	0.3779	0.3633	0.337	0.1313	0.1367	1.14031	0.872291	1.49068	99	a	p	0.3098	+++	0	0.7393	1.03769	0.96605	1.11465	0.365757	0.332724	0.0266	1.15039	1.01651	1.30189	0.3738	0.3874	0.933	1.006	0.875377	1.15611	0.3739	0.3761	0.675	0.968
AA_B_41_31432593	31432593	T	A	0.3025	0.291	0.0741	1.08271	1.00696	1.18139	0.3157	0.31	0.672	1.04498	0.852614	1.28075	0.3395	0.3056	0.113	0.2243	0.1413	1.25145	0.948714	1.65078		a	t	0.02937	---	0	0.5646	0.917961	0.849907	0.991465	0.28094	0.263313	0.228	1.08508	0.950282	1.23899	0.3044	0.3201	0.692	0.971416	0.841535	1.12134	0.313	0.289	0.0694	0.864
AA_B_45_31432581_E	31432581	P	A	0.2032	0.1946	0.437	1.04001	1.00389	1.14819	0.1909	0.2012	0.795	0.968913	0.763773	1.22915	0.1847	0.1781	0.911	-0.01999	0.17875	0.980208	0.6905	1.39147		a	p	0.5692	-++	0	0.8353	0.974627	0.892172	1.0647	0.233696	0.201255	0.0173	1.19036	1.03178	1.37332	0.2058	0.1992	0.781	1.02402	0.866072	1.21078	0.2147	0.2026	0.46	0.933
AA_B_45_31432581_G	31432581	P	A	0.0565	0.0581	0.731	0.970494	0.994898	1.15122	0.02	0.0343	0.0456	0.554106	0.310619	0.988455	0.0172	0.018	0.92	0.04954	0.49548	1.05079	0.397882	2.77508		a	p	0.3863	++-	-18.5	0.185	1.07401	0.913836	1.26226	0.0595927	0.0763255	0.0236	0.758305	0.59455	0.967164	0.0301	0.0375	0.251	0.797911	0.542748	1.17303	0.05342	0.07758	0.00768	1.536
AA_B_45_31432581_K	31432581	P	A	0.2546	0.244	0.105	1.07824	1.00689	1.18108	0.2047	0.1907	0.443	1.09713	0.865659	1.3905	0.2248	0.2026	0.248	0.1862	0.161	1.20466	0.878658	1.65163		a	p	0.04264	---	0	0.8015	0.918604	0.846179	0.997228	0.273374	0.250192	0.126	1.11006	0.971443	1.26847	0.2205	0.2456	0.262	0.912568	0.777629	1.07092	0.2853	0.277	0.305	0.918
AA_B_45_31432581_M	31432581	P	A	0.2046	0.2276	0.00115	0.853116	0.984902	0.938855	0.3316	0.334	0.833	0.978318	0.798379	1.19881	0.3317	0.3638	0.334	-0.1413	0.1462	0.868229	0.651908	1.15633		a	p	0.001466	+++	0	0.4894	1.14408	1.05305	1.24298	0.139251	0.158458	0.0361	0.837587	0.708715	0.989892	0.3133	0.2949	0.801	1.01908	0.880128	1.17997	0.187	0.1505	0.0155	0.788
AA_B_45_31432581_T	31432581	P	A	0.281	0.2758	0.318	1.04547	1.00389	1.14082	0.2537	0.2421	0.611	1.05867	0.849608	1.31917	0.2463	0.2384	0.894	0.02293	0.17249	1.02319	0.729679	1.43478		a	p	0.2645	---	0	0.9861	0.956093	0.883652	1.03447	0.294663	0.314351	0.472	0.954066	0.839151	1.08472	0.2348	0.2264	0.275	1.09225	0.932131	1.27987	0.2639	0.2923	0.0582	1.178
AA_B_46_31432578	31432578	A	E	0.2047	0.2276	0.00115	0.853116	0.984902	0.938855	0.3316	0.334	0.833	0.978348	0.798418	1.19883	0.3317	0.3638	0.334	-0.1413	0.1462	0.868229	0.651908	1.15633	99	a	e	0.001467	---	0	0.4891	0.874065	0.804521	0.949621	0.139212	0.158429	0.036	0.837494	0.708623	0.989801	0.3133	0.2949	0.8	1.01912	0.880152	1.18003	0.187	0.1505	0.0155	0.788
AA_B_52_31432560	31432560	V	I	0.0566	0.0581	0.731	0.970494	0.994898	1.15122	0.0201	0.0343	0.046	0.554882	0.311115	0.989646	0.0172	0.018	0.919	0.05031	0.49552	1.0516	0.398157	2.77744		i	v	0.3869	++-	-19	0.1863	1.0739	0.913745	1.26213	0.0595927	0.0763255	0.0236	0.758305	0.59455	0.967164	0.0301	0.0375	0.25	0.797563	0.542496	1.17256	0.05342	0.07758	0.00768	1.536
AA_B_62_31432530	31432530	G	R	0.0558	0.0651	0.406	0.928542	0.98712	1.10596	0.0565	0.0538	0.999	1.00032	0.661506	1.51268	0.1003	0.1253	0.221	-0.2919	0.2384	0.746843	0.468058	1.19168	99	g	r	0.2618	-+-	0	0.6279	0.916494	0.787028	1.06726	NA	NA	NA	NA	NA	NA	0.0937	0.1109	0.11	0.835527	0.670083	1.04182	0.007479	0.006716	0.613	0.795
AA_B_63_31432527	31432527	N	E	0.4252	0.3845	0.000212	1.16717	1.01272	1.26664	0.3801	0.3587	0.182	1.14063	0.94004	1.38402	0.3691	0.3537	0.818	-0.03249	0.14148	0.968032	0.7336	1.27738		e	n	0.0001889	--+	0	0.4462	0.870663	0.809599	0.936333	0.454342	0.444538	0.189	1.08322	0.961517	1.22033	0.3735	0.3354	0.214	1.09534	0.948694	1.26466	0.4167	0.4215	0.519	1.051
AA_B_65_31432521	31432521	R	Q	0.0559	0.0652	0.417	0.930047	0.987394	1.10784	0.0574	0.054	0.984	1.00413	0.664345	1.5177	0.1004	0.1253	0.22	-0.2923	0.2384	0.746545	0.46787	1.1912		q	r	0.2714	+-+	0	0.6205	1.08915	0.935296	1.26832	NA	NA	NA	NA	NA	NA	0.0938	0.1112	0.109	0.835039	0.669698	1.0412	0.007479	0.006716	0.613	0.795
AA_B_66_31432518_I	31432518	A	P	0.105	0.109	0.824	1.01496	1.00194	1.1566	0.1127	0.1225	0.232	0.835604	0.622512	1.12164	0.2072	0.2431	0.157	-0.2285	0.1615	0.795726	0.579819	1.09203	99	a	p	0.4457	+--	-37.9	0.2346	0.957433	0.856227	1.0706	0.0515233	0.0593597	0.0274	0.753292	0.583191	0.973006	0.1851	0.1965	0.278	0.907283	0.761147	1.08148	0.05128	0.05373	0.864	0.971
AA_B_66_31432518_K	31432518	P	A	0.0491	0.0438	0.223	1.1223	1.02163	1.35104	0.0561	0.069	0.105	0.716555	0.478988	1.07195	0.1075	0.1179	0.454	-0.1619	0.2162	0.850526	0.556743	1.29933		a	p	0.903	-++	14.2	0.09716	0.990347	0.846789	1.15824	0.0492452	0.053764	0.104	0.804761	0.617437	1.04892	0.0925	0.0864	0.77	1.03635	0.815378	1.31721	0.04487	0.04701	0.904	0.979
AA_B_66_31432518_N	31432518	P	A	0.0559	0.0652	0.416	0.930038	0.987392	1.10783	0.0569	0.0541	1	0.999922	0.661241	1.51207	0.1004	0.1253	0.22	-0.2923	0.2384	0.746545	0.46787	1.1912		a	p	0.2681	+++	0	0.6258	1.08992	0.935951	1.26921	NA	NA	NA	NA	NA	NA	0.0939	0.1112	0.11	0.835399	0.669991	1.04164	0.007479	0.006716	0.613	0.795
AA_B_67_31432515_C	31432515	P	A	0.0827	0.0663	0.000495	1.3048	1.04063	1.51548	0.0707	0.0783	0.916	0.980012	0.674102	1.42475	0.1141	0.1019	0.98	-0.005375	0.216025	0.994639	0.651301	1.51897		a	p	0.002461	-++	-34.3	0.2255	0.815462	0.714549	0.930628	0.0794414	0.064875	0.092	1.22376	0.968929	1.54562	0.1166	0.099	0.805	1.02848	0.823169	1.28499	0.06838	0.06207	0.672	0.938
AA_B_67_31432515_F	31432515	P	A	0.208	0.1875	0.018	1.12553	1.01165	1.24136	0.1685	0.1518	0.252	1.1623	0.898396	1.50372	0.1218	0.1161	0.794	-0.0555	0.2126	0.946012	0.623631	1.43504		a	p	0.01237	--+	0	0.6978	0.892169	0.81589	0.975579	0.215125	0.203228	0.0759	1.14126	0.986756	1.31995	0.1237	0.1092	0.0125	1.31872	1.06129	1.63858	0.1848	0.1802	0.847	0.981
AA_B_67_31432515_M	31432515	P	A	0.056	0.0652	0.417	0.930038	0.987391	1.10785	0.057	0.0542	0.967	0.991202	0.654597	1.5009	0.1004	0.1253	0.22	-0.2923	0.2384	0.746545	0.46787	1.1912		a	p	0.2614	+++	0	0.6363	1.09122	0.936891	1.27098	NA	NA	NA	NA	NA	NA	0.094	0.1114	0.109	0.834785	0.66942	1.041	0.007479	0.006716	0.613	0.795
AA_B_67_31432515_S	31432515	P	A	0.4476	0.4866	6.3e-05	0.849472	0.987048	0.920139	0.5398	0.5305	0.649	1.04445	0.865919	1.25979	0.4836	0.4711	0.285	0.1419	0.1329	1.15246	0.888177	1.49539		a	p	0.002063	+--	49.1	0.01959	1.11762	1.04127	1.19956	0.493226	0.495427	0.794	0.984274	0.874118	1.10831	0.4747	0.4823	0.534	0.957667	0.835702	1.09743	0.4669	0.4752	0.54	1.047
AA_B_67_31432515_Y	31432515	P	A	0.2055	0.1945	0.39	1.04429	1.00429	1.1527	0.1654	0.188	0.0876	0.797718	0.615508	1.03387	0.1849	0.1868	0.916	-0.01889	0.17988	0.981287	0.68973	1.39609		a	p	0.8707	-++	-9.8	0.1618	0.992627	0.907759	1.08543	0.210155	0.230975	0.0372	0.856188	0.739227	0.991654	0.1959	0.2028	0.909	0.989843	0.830337	1.17999	0.2094	0.2263	0.278	1.107
AA_B_69_31432509_A	31432509	P	A	0.212	0.2169	0.92	0.995054	0.999521	1.09598	0.1478	0.1643	0.31	0.871622	0.668588	1.13631	0.1869	0.2095	0.401	-0.1532	0.1824	0.857958	0.600073	1.22667		a	p	0.5253	+++	0	0.5108	1.02891	0.942232	1.12356	0.157332	0.175487	0.101	0.87237	0.74034	1.02794	0.2098	0.241	0.0407	0.841991	0.71413	0.992743	0.1581	0.1762	0.167	1.152
AA_B_69_31432509_R	31432509	P	A	0.0491	0.0438	0.223	1.12222	1.02162	1.35095	0.0562	0.0691	0.105	0.717057	0.479417	1.07249	0.1076	0.118	0.454	-0.1618	0.2162	0.850611	0.556798	1.29946		a	p	0.9028	-++	14	0.0977	0.990248	0.846704	1.15813	0.0492452	0.0537664	0.104	0.804736	0.617416	1.04889	0.0927	0.0864	0.759	1.03823	0.8168	1.31969	0.04487	0.04701	0.904	0.979
AA_B_69_31432509_T	31432509	A	P	0.2611	0.2607	0.629	1.0224	1.00199	1.11846	0.2035	0.2325	0.0655	0.802037	0.634313	1.01411	0.2932	0.3272	0.223	-0.17923	0.14711	0.835914	0.626526	1.11528	99	a	p	0.5896	+--	17.1	0.08966	0.978045	0.902347	1.06009	0.206374	0.229113	0.0165	0.835665	0.720893	0.968709	0.3012	0.3263	0.087	0.875943	0.752667	1.01941	0.2019	0.2233	0.199	1.129
AA_B_70_31432506_K	31432506	P	A	0.0268	0.0264	0.778	1.03559	1.00852	1.31983	0.0044	0.0148	0.061	0.336991	0.108016	1.05136	0.0153	0.0209	0.428	-0.3977	0.5019	0.671864	0.251221	1.79683		a	p	0.7666	-++	3.2	0.1268	1.03552	0.822344	1.30395	NA	NA	NA	NA	NA	NA	0.0301	0.03	0.767	0.942526	0.637134	1.3943	0.001068	0	0.967	0
AA_B_70_31432506_N	31432506	A	P	0.2611	0.2607	0.629	1.0224	1.00199	1.11846	0.2035	0.2326	0.0654	0.801957	0.634126	1.01421	0.2933	0.3272	0.224	-0.17897	0.14712	0.836131	0.626676	1.11559	99	a	p	0.5905	+--	17	0.08992	0.978142	0.902437	1.0602	0.206352	0.229127	0.0164	0.835471	0.720729	0.968481	0.3012	0.3263	0.0876	0.87617	0.75286	1.01968	0.2019	0.2233	0.199	1.129
AA_B_70_31432506_Q	31432506	P	A	0.1783	0.1692	0.355	1.04974	1.005	1.16344	0.1429	0.1647	0.111	0.802278	0.611909	1.05187	0.18	0.1815	0.856	-0.03259	0.17963	0.967935	0.680679	1.37642		a	p	0.8098	-++	-18.6	0.1853	0.988665	0.901128	1.0847	0.203233	0.222827	0.0416	0.85762	0.739232	0.994969	0.1797	0.1874	0.579	0.950385	0.794143	1.13737	0.1955	0.2165	0.182	1.136
AA_B_70_31432506_S	31432506	P	A	0.056	0.0652	0.414	0.92974	0.987334	1.10752	0.0571	0.0546	0.958	0.988872	0.653165	1.49712	0.1003	0.1254	0.218	-0.2939	0.2384	0.745351	0.467122	1.1893		a	p	0.2575	+++	0	0.6356	1.09199	0.937547	1.27187	NA	NA	NA	NA	NA	NA	0.094	0.1111	0.114	0.837013	0.671253	1.04371	0.007479	0.006716	0.613	0.795
AA_B_71_31432503	31432503	A	T	0.2611	0.2607	0.629	1.0224	1.00199	1.11846	0.2035	0.2326	0.0654	0.801957	0.634126	1.01421	0.2933	0.3272	0.224	-0.17898	0.14711	0.836123	0.626682	1.11556	99	a	t	0.5904	+--	17	0.0899	0.978142	0.902437	1.0602	0.206312	0.229088	0.0163	0.835412	0.720677	0.968412	0.3011	0.3262	0.0873	0.876064	0.752772	1.01955	0.2019	0.2233	0.199	1.129
AA_B_74_31432494	31432494	D	Y	0.2306	0.2078	0.00847	1.13567	1.01212	1.24848	0.178	0.2049	0.0885	0.805655	0.628246	1.03316	0.2222	0.2187	0.956	0.009323	0.168289	1.00937	0.725769	1.40378	99	d	y	0.07099	+-+	39.2	0.03735	1.08188	0.993267	1.1784	0.260281	0.272104	0.0868	0.888388	0.775479	1.01774	0.2322	0.2456	0.349	0.924576	0.784588	1.08954	0.2297	0.2566	0.0755	1.173
AA_B_76_31432488	31432488	V	E	0.0491	0.0438	0.223	1.12222	1.02162	1.35095	0.0562	0.0692	0.105	0.716842	0.479273	1.07217	0.1076	0.118	0.454	-0.1618	0.2162	0.850611	0.556798	1.29946		e	v	0.9032	-++	14.1	0.09746	0.990347	0.846789	1.15824	0.0492452	0.053764	0.104	0.804761	0.617437	1.04892	0.0925	0.0862	0.756	1.03874	0.817188	1.32036	0.04487	0.04701	0.904	0.979
AA_B_77_31432485_D	31432485	P	A	0.0395	0.0416	0.735	0.966514	0.993306	1.1772	0.0254	0.0322	0.115	0.623255	0.346247	1.12188	0.0129	0.0038	0.174	1.2033	0.885	3.33109	0.58784	18.8762		a	p	0.5016	++-	-0.1	0.1355	1.06577	0.885053	1.28339	NA	NA	NA	NA	NA	NA	0.0089	0.0171	0.293	0.707652	0.371596	1.34762	0.005342	0.005327	0.933	1.045
AA_B_77_31432485_N	31432485	P	A	0.3586	0.3868	0.0388	0.915834	0.992693	0.995508	0.3656	0.3685	0.985	0.998031	0.810235	1.22935	0.378	0.3873	0.505	-0.09479	0.14214	0.909564	0.688401	1.20178		a	p	0.04204	+++	0	0.7486	1.08047	1.00273	1.16425	0.261447	0.332942	1.1e-06	0.722356	0.632786	0.824605	0.3549	0.3279	0.0084	1.222	1.05274	1.41847	0.2746	0.3604	1.37e-06	1.504
AA_B_77_31432485_S	31432485	A	P	0.3982	0.4283	0.0302	0.913465	0.992619	0.991377	0.39	0.3992	0.561	0.940851	0.766195	1.15532	0.3888	0.3899	0.694	-0.05533	0.14082	0.946173	0.717963	1.24692	99	a	p	0.02425	---	0	0.9446	0.919155	0.854188	0.989064	0.266094	0.336957	9.03e-07	0.721228	0.632064	0.822971	0.3626	0.3442	0.0194	1.19286	1.02893	1.38289	0.2788	0.3657	1.12e-06	1.504
AA_B_-8_31432865_L	31432865	P	A	0.4332	0.4464	0.0219	0.909764	0.992383	0.986374	0.4976	0.4978	0.456	0.929331	0.766366	1.12695	0.5837	0.6045	0.404	-0.1229	0.1474	0.884352	0.662454	1.18058		a	p	0.01126	+++	0	0.9595	1.0979	1.0215	1.18002	0.47788	0.473932	0.679	0.975332	0.86653	1.0978	0.5732	0.5944	0.0064	0.825627	0.719397	0.947543	0.4947	0.4699	0.198	0.908
AA_B_-8_31432865_V	31432865	A	P	0.4338	0.4468	0.0225	0.910174	0.992419	0.986818	0.5008	0.5006	0.516	0.938146	0.773771	1.13744	0.5851	0.6052	0.436	-0.1146	0.1472	0.891723	0.668237	1.18995	99	a	p	0.01332	---	0	0.9476	0.912835	0.849313	0.981109	0.478933	0.474561	0.711	0.977933	0.868971	1.10056	0.5741	0.595	0.00637	0.825392	0.719091	0.947407	0.4947	0.4699	0.198	0.908
AA_B_80_31432476_I	31432476	P	A	0.1974	0.2178	0.0414	0.903147	0.990076	0.99604	0.1862	0.1837	0.933	1.01073	0.787265	1.29762	0.1887	0.2143	0.205	-0.2353	0.1855	0.790334	0.549427	1.13687		a	p	0.03394	+-+	0	0.5279	1.10043	1.00733	1.20213	0.208245	0.247832	0.00361	0.811334	0.703957	0.93509	0.1868	0.2017	0.766	1.02627	0.864904	1.21773	0.1976	0.2341	0.0115	1.273
AA_B_80_31432476_N	31432476	A	P	0.4004	0.43	0.0349	0.915678	0.992818	0.99376	0.3919	0.4036	0.546	0.938756	0.764443	1.15282	0.403	0.4106	0.515	-0.09182	0.1409	0.912269	0.692128	1.20243	99	a	p	0.02273	---	0	0.9748	0.918329	0.85342	0.988174	0.266527	0.337326	9.06e-07	0.721212	0.632036	0.822971	0.3875	0.3693	0.0489	1.15704	1.00069	1.33782	0.2788	0.3657	1.12e-06	1.504
AA_B_80_31432476_T	31432476	P	A	0.2029	0.2121	0.64	0.976569	0.997649	1.07849	0.206	0.2208	0.429	0.908155	0.715163	1.15323	0.2155	0.1967	0.683	0.06768	0.16586	1.07002	0.773055	1.48107		a	p	0.5504	++-	0	0.7212	1.02727	0.940541	1.12199	0.0582867	0.0894826	0.000108	0.632726	0.498126	0.803698	0.2021	0.1688	0.0342	1.21243	1.01446	1.44904	0.08226	0.1315	0.00012	1.662
AA_B_81_31432473	31432473	A	L	0.3587	0.3868	0.0392	0.915972	0.992705	0.995657	0.365	0.3677	0.989	0.998489	0.810714	1.22976	0.3771	0.3865	0.505	-0.09455	0.14192	0.909782	0.688863	1.20155	99	a	l	0.04255	---	0	0.7469	0.925705	0.859095	0.997479	0.261179	0.332394	1.13e-06	0.722246	0.632543	0.824671	0.3549	0.3279	0.00848	1.22167	1.05248	1.41806	0.2735	0.3604	1.03e-06	1.511
AA_B_82_31432470	31432470	L	R	0.4004	0.43	0.0349	0.915678	0.992818	0.99376	0.3918	0.4036	0.546	0.938756	0.764593	1.15259	0.403	0.4106	0.515	-0.09182	0.1409	0.912269	0.692128	1.20243	99	l	r	0.02272	---	0	0.9747	0.918329	0.85342	0.988174	0.266548	0.337317	9.04e-07	0.721107	0.631913	0.82289	0.3875	0.3693	0.0489	1.15704	1.00069	1.33782	0.2788	0.3657	1.12e-06	1.504
AA_B_83_31432467	31432467	R	G	0.4004	0.43	0.0348	0.915651	0.992815	0.99373	0.3918	0.4036	0.546	0.938765	0.764525	1.15271	0.403	0.4106	0.515	-0.09175	0.1409	0.912333	0.692177	1.20251		g	r	0.0227	+++	0	0.9747	1.08893	1.01197	1.17176	0.266527	0.337304	9.03e-07	0.721105	0.631913	0.822885	0.3875	0.3693	0.0489	1.15704	1.00069	1.33782	0.2788	0.3657	1.12e-06	1.504
AA_B_9_31432689_D	31432689	P	A	0.0076	0.002	2.32e-06	4.06409	2.26124	7.27232	0.017	0.0108	0.27	1.59026	0.696798	3.62937	0.0023	0.0036	0.628	-0.6332	1.3078	0.53089	0.0409056	6.89012		a	p	1.483e-05	--+	20	0.08221	0.355866	0.222939	0.568051	NA	NA	NA	NA	NA	NA	0.0057	0.0055	0.599	1.29549	0.493347	3.40184	NA	NA	NA	NA
AA_B_9_31432689_H	31432689	P	A	0.2085	0.1833	0.000996	1.17651	1.01586	1.29607	0.203	0.195	0.838	1.02556	0.805106	1.30638	0.2533	0.2223	0.161	0.2172	0.1549	1.24259	0.917224	1.68338		a	p	0.0006701	---	0	0.529	0.861138	0.789986	0.938699	0.233881	0.183944	0.000236	1.31051	1.1352	1.51288	0.2455	0.2738	0.0123	0.820283	0.702449	0.957884	NA	NA	NA	NA
AA_B_9_31432689_Y	31432689	A	P	0.2161	0.1853	6.28e-05	1.21619	1.01894	1.33855	0.2199	0.2055	0.594	1.06684	0.841097	1.35317	0.2543	0.2247	0.182	0.2064	0.1545	1.22924	0.908083	1.66399	99	a	p	3.648e-05	+++	0	0.5957	1.19686	1.09904	1.30338	0.233881	0.183944	0.000236	1.31051	1.1352	1.51288	0.2501	0.2784	0.0155	0.826219	0.707923	0.964283	NA	NA	NA	NA
AA_B_94_31432189	31432189	I	T	0.238	0.2595	0.088	0.921355	0.992322	1.01226	0.2196	0.2086	0.789	1.03268	0.816038	1.30684	0.3218	0.3332	0.749	-0.04736	0.14799	0.953744	0.713609	1.27469		t	i	0.13	+-+	0	0.6729	1.06673	0.981089	1.15985	0.154332	0.172639	0.272	0.913956	0.777897	1.07381	0.2799	0.2465	0.246	1.09367	0.940126	1.27228	0.1677	0.2066	0.0137	1.276
AA_B_95_31432186_I	31432186	P	A	0.253	0.2764	0.0633	0.916365	0.991981	1.00485	0.2415	0.2293	0.963	1.00535	0.801498	1.26105	0.3335	0.3366	0.967	-0.00601	0.14539	0.994008	0.747535	1.32175		a	p	0.1004	+-+	0	0.6862	1.07101	0.986954	1.16222	0.160167	0.178273	0.235	0.908672	0.775251	1.06506	0.2842	0.2591	0.504	1.05213	0.90628	1.22146	0.172	0.2119	0.0113	1.283
AA_B_95_31432186_L	31432186	P	A	0.419	0.4133	0.776	0.988072	0.999009	1.07321	0.4714	0.4608	0.826	1.02256	0.838517	1.247	0.4935	0.4915	0.93	0.01191	0.13563	1.01198	0.77575	1.32015		a	p	0.8833	+--	0	0.9438	1.00552	0.934444	1.08199	0.473529	0.426648	0.0143	1.15925	1.02988	1.30486	0.5234	0.5203	0.533	0.957103	0.83388	1.09854	0.4936	0.4231	6.62e-05	0.739
AA_B_95_31432186_W	31432186	P	A	0.328	0.3103	0.0412	1.09282	1.00759	1.19001	0.2881	0.3121	0.763	0.968206	0.784771	1.19452	0.1754	0.1728	0.987	0.002972	0.179429	1.00298	0.705599	1.42569		a	p	0.08199	-+-	0	0.5392	0.933887	0.864652	1.00867	0.365649	0.394337	0.118	0.909245	0.806792	1.02471	0.1952	0.2235	0.998	0.999829	0.843475	1.18517	0.3365	0.365	0.0521	1.17
AA_B_97_31432180_N	31432180	P	A	0.0268	0.0263	0.767	1.03735	1.00893	1.32197	0.0073	0.0169	0.131	0.445838	0.156265	1.27202	0.0171	0.021	0.548	-0.2973	0.4953	0.742821	0.281369	1.96107		a	p	0.8478	-++	-48.6	0.2603	1.02276	0.813007	1.28662	NA	NA	NA	NA	NA	NA	0.0342	0.0308	0.797	0.949757	0.641721	1.40565	0.001068	0	0.967	0
AA_B_97_31432180_R	31432180	A	P	0.4939	0.478	0.132	1.0626	1.00481	1.14994	0.4237	0.452	0.772	0.971834	0.800961	1.17916	0.2346	0.2434	0.739	-0.0533	0.1597	0.948096	0.693286	1.29656	99	a	p	0.2397	+--	0	0.5818	1.04362	0.971953	1.12058	0.561022	0.554096	0.471	1.04415	0.928285	1.17449	0.3155	0.3317	0.213	1.09825	0.947737	1.27268	0.5021	0.4734	0.0833	0.876
AA_B_97_31432180_S	31432180	P	A	0.1387	0.139	0.639	0.972641	0.996788	1.09224	0.1191	0.1114	0.614	1.08229	0.796286	1.47102	0.0429	0.0484	0.924	0.0329	0.3463	1.03345	0.524218	2.03735		a	p	0.809	+--	0	0.8084	1.01329	0.910272	1.12796	0.195987	0.160405	0.00284	1.26474	1.08476	1.47459	0.0853	0.0772	0.0212	1.36548	1.04774	1.77959	0.1635	0.1619	0.771	0.97
AA_B_97_31432180_T	31432180	P	A	0.3268	0.3098	0.0479	1.08992	1.00737	1.18699	0.2853	0.3092	0.75	0.966494	0.783844	1.19171	0.175	0.1713	0.972	0.006373	0.179382	1.00639	0.708068	1.43041		a	p	0.09341	-+-	0	0.5486	0.936131	0.86673	1.01109	0.365533	0.394227	0.118	0.909288	0.806842	1.02474	0.1943	0.2225	0.993	1.00072	0.844164	1.1863	0.3365	0.3652	0.0494	1.172
AA_B_97_31432180_V	31432180	P	A	0.0009	0.0024	0.161	0.420547	0.350315	1.41163	0.0125	0.0161	0.939	0.970213	0.447391	2.104	0.0029	0.0038	0.406	-0.9812	1.1819	0.374861	0.0369672	3.80123		a	p	0.3106	+++	0	0.4421	1.38375	0.738608	2.59241	NA	NA	NA	NA	NA	NA	0.0056	0.0051	0.965	1.02328	0.363126	2.88358	NA	NA	NA	NA
AA_B_99_31432174_S	31432174	P	A	0.0149	0.0168	0.502	0.897708	0.966605	1.22979	0.0224	0.0215	0.531	0.811882	0.422954	1.55845	0.0129	0.0039	0.178	1.1901	0.8841	3.28741	0.581156	18.5958		a	p	0.5166	++-	-79	0.3271	1.09702	0.829367	1.45106	NA	NA	NA	NA	NA	NA	0.0057	0.0139	0.0262	0.406599	0.183931	0.89883	0.005342	0.005558	0.823	1.122
AA_B_99_31432174_Y	31432174	A	P	0.0162	0.0184	0.459	0.888652	0.963772	1.21474	0.0242	0.0238	0.504	0.800915	0.417732	1.53559	0.0141	0.0042	0.156	1.2495	0.8805	3.4886	0.62109	19.5951	99	a	p	0.4743	--+	-60.2	0.287	0.903481	0.684119	1.19318	NA	NA	NA	NA	NA	NA	0.0061	0.0143	0.0273	0.4107	0.186338	0.905206	0.005342	0.005558	0.823	1.122
AA_C_1_31347624_C	31347624	A	P	0.3241	0.3492	0.00313	0.881447	0.989492	0.958411	0.2923	0.2858	0.516	0.935382	0.764388	1.14463	0.3726	0.3613	0.392	0.1208	0.1411	1.1284	0.855768	1.48789	99	a	p	0.008361	--+	-36.6	0.2312	0.904656	0.839726	0.974608	0.317427	0.296889	0.0531	1.13106	0.998555	1.28115	0.356	0.3563	0.996	1.00039	0.870186	1.15007	NA	NA	NA	NA
AA_C_1_31347624_G	31347624	P	A	0.3201	0.3443	0.00327	0.882153	0.989578	0.959028	0.2917	0.2853	0.514	0.935064	0.764173	1.14417	0.3722	0.3599	0.371	0.1264	0.1411	1.13474	0.860574	1.49624		a	p	0.008872	++-	-32	0.2197	1.1044	1.02533	1.18956	0.317427	0.296889	0.0531	1.13106	0.998555	1.28115	0.3557	0.3561	0.994	0.999422	0.869335	1.14898	NA	NA	NA	NA
AA_C_103_31347068	31347068	V	L	0.2708	0.2816	0.155	0.938202	0.994403	1.02449	0.23	0.2055	0.915	0.987736	0.788176	1.23782	0.3186	0.2938	0.122	0.2312	0.1494	1.26011	0.940236	1.68881		l	v	0.3706	++-	-10.4	0.1633	1.03676	0.958019	1.12197	0.281588	0.257738	0.0343	1.15093	1.01076	1.31055	0.2814	0.2914	0.694	1.02985	0.889252	1.19268	0.2959	0.2409	0.00157	0.769
AA_C_11_31347594	31347594	S	A	0.3299	0.3623	0.000386	0.859977	0.987513	0.934681	0.222	0.2466	0.17	0.855217	0.683837	1.06955	0.2438	0.263	0.176	-0.2073	0.1531	0.812776	0.602073	1.09722		a	s	5.747e-05	+++	0	0.9388	1.16777	1.0829	1.25931	0.312879	0.362743	0.00057	0.805335	0.711457	0.911602	0.2622	0.2586	0.209	1.10089	0.94747	1.27914	0.3109	0.3842	0.0002	1.345
AA_C_113_31347038	31347038	H	Y	0.0354	0.0282	0.0276	1.27599	1.05427	1.58498	0.0464	0.0521	0.719	0.926177	0.609993	1.40625	0.0275	0.0471	0.181	-0.5022	0.3754	0.605198	0.289968	1.26312	99	h	y	0.1638	+--	17.2	0.08923	1.14145	0.947527	1.37506	0.0335609	0.0324871	0.804	0.960316	0.696505	1.32405	0.0366	0.041	0.426	0.864956	0.60519	1.23622	0.08333	0.03219	1.22e-09	0.382
AA_C_114_31347035	31347035	N	D	0.1631	0.1694	0.269	0.941539	0.993586	1.04768	0.1839	0.2157	0.582	0.936487	0.741285	1.18309	0.1381	0.1793	0.0623	-0.3505	0.188	0.704336	0.487249	1.01814		d	n	0.0952	+++	-80.5	0.3302	1.08329	0.986212	1.18992	0.165324	0.124561	2.67e-05	1.44152	1.21674	1.70782	0.1666	0.1517	0.588	0.949422	0.786766	1.14571	0.1186	0.122	0.798	1.03
AA_C_116_31347029_F	31347029	P	A	0.1793	0.1842	0.393	0.956093	0.995387	1.0598	0.2057	0.2352	0.764	0.966253	0.772213	1.20905	0.1521	0.19	0.121	-0.2793	0.1801	0.756313	0.53137	1.07648		a	p	0.2044	+++	0	0.446	1.06035	0.968743	1.16062	0.180189	0.13408	1.1e-06	1.51006	1.28073	1.78046	0.1904	0.1662	0.634	0.95673	0.797588	1.14763	0.1325	0.1339	0.969	1.004
AA_C_116_31347029_L	31347029	P	A	0.0273	0.0224	0.114	1.21943	1.05001	1.55949	0.0416	0.047	0.98	0.994366	0.637652	1.55063	0.0218	0.0381	0.153	-0.59806	0.41797	0.549877	0.242372	1.24752		a	p	0.3359	-++	-10.5	0.1636	0.902849	0.733189	1.11177	0.0335609	0.0324886	0.804	0.96024	0.696447	1.32395	0.031	0.0338	0.475	0.866837	0.585702	1.28292	0.08226	0.03265	3.4e-09	0.392
AA_C_116_31347029_S	31347029	P	A	0.4207	0.4118	0.0415	1.09007	1.00718	1.1843	0.4636	0.4274	0.0546	1.21385	0.996239	1.479	0.4537	0.4419	0.846	-0.02598	0.13382	0.974355	0.749561	1.26656		a	p	0.01371	--+	0	0.4034	0.911832	0.847382	0.981183	0.349914	0.39878	0.000847	0.812284	0.718474	0.918342	0.4321	0.4529	0.635	0.96821	0.847169	1.10654	0.3173	0.4291	1.91e-09	1.632
AA_C_116_31347029_Y	31347029	P	A	0.3729	0.3817	0.0665	0.925658	0.993646	1.00528	0.2914	0.2931	0.0757	0.820944	0.660433	1.02047	0.3743	0.3409	0.135	0.2178	0.1456	1.24334	0.934657	1.65397		a	p	0.06089	++-	23.8	0.0724	1.0738	0.996725	1.15683	0.436313	0.434638	0.911	0.993183	0.88093	1.11974	0.3485	0.3486	0.271	1.08056	0.941185	1.24057	0.4679	0.4053	0.000993	0.778
AA_C_14_31347585	31347585	W	R	0.0483	0.0621	0.00115	0.743609	0.948474	0.888994	0.058	0.0753	0.475	0.872319	0.599332	1.26965	0.0318	0.0449	0.0947	-0.5772	0.3454	0.561468	0.285309	1.10493		r	w	0.0003978	+++	0	0.514	1.32764	1.13496	1.55302	0.0358362	0.0391566	0.815	0.963481	0.705128	1.31649	0.0542	0.0544	0.508	0.901902	0.664346	1.2244	0.02778	0.04076	0.056	1.526
AA_C_147_31346936	31346936	L	W	0.1554	0.1266	2.92e-05	1.26712	1.02663	1.4159	0.2011	0.1576	0.0249	1.32273	1.03592	1.68896	0.2365	0.2045	0.518	0.1022	0.1582	1.1076	0.812311	1.51025	99	l	w	2.596e-06	+++	0	0.6618	1.25923	1.14392	1.38616	0.144026	0.131945	0.336	1.08773	0.916979	1.29028	0.2269	0.211	0.497	0.944374	0.800585	1.11399	0.1197	0.1302	0.371	1.109
AA_C_-15_31347799_I	31347799	A	P	0.1977	0.1604	6.17e-07	1.29315	1.02632	1.43066	0.2448	0.2176	0.237	1.14099	0.916827	1.41997	0.2636	0.246	0.779	0.0427	0.1522	1.04362	0.774442	1.40637	99	a	p	1.047e-06	+++	-60.2	0.287	1.24408	1.13973	1.358	0.177738	0.164629	0.453	1.06128	0.908864	1.23926	0.264	0.2535	0.355	0.929687	0.796671	1.08491	NA	NA	NA	NA
AA_C_-15_31347799_L	31347799	P	A	0.1976	0.1603	6.08e-07	1.29329	1.02633	1.43082	0.2444	0.2169	0.237	1.14134	0.916923	1.42067	0.2634	0.2451	0.754	0.04778	0.1523	1.04894	0.778234	1.41381		a	p	9.812e-07	---	-65.5	0.2987	0.803241	0.735862	0.87679	0.177738	0.164629	0.453	1.06128	0.908864	1.23926	0.2638	0.2532	0.352	0.929311	0.796287	1.08456	NA	NA	NA	NA
AA_C_152_31346921_A	31346921	P	A	0.1554	0.1266	2.92e-05	1.26712	1.02663	1.4159	0.2048	0.1594	0.0193	1.33656	1.04818	1.70428	0.2365	0.2062	0.542	0.09641	0.15811	1.10121	0.807764	1.50126		a	p	2.266e-06	---	0	0.6182	0.793263	0.720622	0.873227	0.144246	0.13209	0.331	1.08862	0.917747	1.2913	0.2292	0.212	0.548	0.950672	0.806205	1.12103	0.1218	0.1308	0.43	1.095
AA_C_152_31346921_E	31346921	A	P	0.2463	0.2068	1.01e-05	1.23114	1.01938	1.35018	0.3112	0.2842	0.0955	1.19435	0.96934	1.47158	0.3198	0.3136	0.938	-0.01125	0.14395	0.988813	0.74573	1.31113	99	a	p	7.028e-06	++-	-90.4	0.3498	1.2037	1.1101	1.30519	0.267755	0.209412	5.04e-06	1.38108	1.20268	1.58594	0.3149	0.2919	0.416	0.939011	0.807015	1.0926	0.2105	0.207	0.863	0.984
AA_C_152_31346921_T	31346921	P	A	0.0907	0.08	0.146	1.10804	1.01428	1.27228	0.1073	0.1258	0.639	0.932375	0.695654	1.24965	0.084	0.1112	0.213	-0.2835	0.2274	0.753143	0.482293	1.1761		a	p	0.4608	-++	-19.5	0.1877	0.955711	0.847348	1.07793	0.124005	0.0776678	4.72e-08	1.73633	1.42709	2.11259	0.0866	0.0806	0.68	0.949462	0.742001	1.21493	0.08868	0.07642	0.242	0.856
AA_C_156_31346909_D	31346909	P	A	0.008	0.0089	0.554	0.876727	0.944295	1.35542	0.0177	0.015	0.131	1.80688	0.838179	3.89512	0.0094	0.0056	0.733	0.2975	0.871	1.34649	0.244226	7.42357		a	p	0.7653	+--	-50.6	0.2649	0.945256	0.652889	1.36854	0.0147901	0.00946708	0.0063	2.18749	1.26178	3.79235	0.0185	0.0078	0.695	1.14876	0.573888	2.29951	0.01389	0.01181	0.505	0.799
AA_C_156_31346909_L	31346909	A	P	0.4558	0.4925	0.00105	0.876192	0.989604	0.948282	0.4345	0.476	0.41	0.922378	0.761169	1.11773	0.3445	0.3591	0.256	-0.1575	0.1387	0.854277	0.650931	1.12115	99	a	p	0.0004255	---	0	0.8663	0.880822	0.820813	0.945218	0.43182	0.509797	5.08e-07	0.742841	0.661049	0.834753	0.3888	0.3853	0.422	1.05785	0.922285	1.21335	0.5759	0.4683	1e-07	0.67
AA_C_156_31346909_R	31346909	P	A	0.3536	0.3891	0.00031	0.860097	0.987731	0.933512	0.2404	0.2618	0.261	0.881703	0.708062	1.09793	0.2664	0.2883	0.165	-0.204	0.1469	0.815462	0.611449	1.08755		a	p	6.268e-05	+++	0	0.9137	1.16346	1.08038	1.25293	0.31572	0.367721	0.000268	0.796478	0.704144	0.90092	0.2888	0.2756	0.166	1.10913	0.957993	1.28411	0.312	0.3898	9.53e-05	1.366
AA_C_156_31346909_W	31346909	P	A	0.0943	0.0946	0.541	1.04398	1.00595	1.1983	0.1745	0.1996	0.724	0.955969	0.744277	1.22787	0.07	0.0708	0.786	-0.06939	0.25577	0.932963	0.56513	1.54021		a	p	0.7702	-++	0	0.7839	0.982652	0.8738	1.10506	0.101312	0.132625	0.00102	0.736334	0.611435	0.886747	0.0807	0.1019	0.292	0.883419	0.70154	1.11245	0.09829	0.1308	0.00443	1.425
AA_C_16_31347579	31347579	S	G	0.0077	0.0059	0.27	1.2953	1.12644	2.05215	0.0064	0.0159	0.0206	0.344073	0.13942	0.849136	0.0231	0.0295	0.44	-0.3248	0.4205	0.722672	0.31696	1.6477		g	s	0.6851	-++	42.9	0.03012	1.07885	0.74736	1.55738	NA	NA	NA	NA	NA	NA	0.0224	0.0152	0.813	0.9389	0.55696	1.58276	NA	NA	NA	NA
AA_C_163_31346888_L	31346888	P	A	0.2707	0.2815	0.157	0.938371	0.994416	1.02471	0.23	0.2057	0.916	0.987884	0.788279	1.23803	0.3185	0.294	0.124	0.2299	0.1494	1.25847	0.939015	1.68662		a	p	0.372	++-	-11.5	0.1663	1.03666	0.957923	1.12186	0.281588	0.257738	0.0343	1.15093	1.01076	1.31055	0.2818	0.2915	0.68	1.03139	0.890632	1.19438	NA	NA	NA	NA
AA_C_163_31346888_T	31346888	A	P	0.2774	0.2869	0.212	0.945842	0.995143	1.03227	0.2314	0.2155	0.574	0.937827	0.749628	1.17327	0.3185	0.294	0.124	0.2298	0.1494	1.25835	0.938921	1.68645	99	a	p	0.3656	--+	-16.9	0.1808	0.964447	0.891723	1.0431	0.281588	0.257738	0.0343	1.15093	1.01076	1.31055	0.2839	0.2938	0.641	1.03554	0.8943	1.1991	NA	NA	NA	NA
AA_C_-17_31347805_A	31347805	P	A	0.1555	0.1267	3.03e-05	1.26655	1.02658	1.41529	0.1975	0.1557	0.04	1.29214	1.01196	1.6499	0.2364	0.2013	0.445	0.1208	0.1581	1.1284	0.827724	1.5383		a	p	3.23e-06	---	0	0.7662	0.795885	0.723004	0.876113	0.144184	0.132146	0.337	1.08751	0.916886	1.28987	0.2273	0.2124	0.466	0.940359	0.797077	1.1094	NA	NA	NA	NA
AA_C_-17_31347805_T	31347805	A	P	0.1556	0.1269	3.06e-05	1.26638	1.02657	1.41509	0.1977	0.1563	0.0403	1.29137	1.01135	1.64891	0.2365	0.2019	0.457	0.1177	0.1581	1.12491	0.825162	1.53354	99	a	p	3.393e-06	+++	0	0.757	1.25583	1.14083	1.38243	0.144184	0.132146	0.337	1.08751	0.916886	1.28987	0.2266	0.2109	0.51	0.946024	0.802029	1.11587	NA	NA	NA	NA
AA_C_173_31346858	31346858	K	E	0.2707	0.2815	0.157	0.93838	0.994417	1.02472	0.2302	0.2058	0.917	0.988052	0.788413	1.23824	0.3185	0.294	0.124	0.2298	0.1494	1.25835	0.938921	1.68645		e	k	0.3723	++-	-11.5	0.1664	1.03655	0.957827	1.12175	0.281588	0.257738	0.0343	1.15093	1.01076	1.31055	0.2818	0.2915	0.68	1.03139	0.890632	1.19438	0.297	0.2409	0.00136	0.766
AA_C_177_31346846	31346846	K	E	0.1218	0.1156	0.373	1.05675	1.00672	1.19309	0.1374	0.1489	0.578	1.07988	0.823801	1.41556	0.093	0.1138	0.367	-0.1983	0.2198	0.820124	0.533067	1.26176		e	k	0.4331	--+	0	0.521	0.958007	0.860612	1.06643	0.141639	0.0920826	1.16e-08	1.7234	1.43176	2.07445	0.1103	0.0915	0.845	1.02333	0.812243	1.28927	0.1068	0.09356	0.191	0.852
AA_C_184_31346238_H	31346238	A	P	0.1555	0.1267	2.91e-05	1.26717	1.02664	1.41596	0.2015	0.1583	0.0252	1.32181	1.03519	1.68778	0.2367	0.2044	0.51	0.1043	0.1582	1.10993	0.814019	1.51342	99	a	p	2.564e-06	+++	0	0.6703	1.25936	1.14403	1.3863	0.144015	0.131931	0.336	1.08764	0.916899	1.29019	0.2271	0.2111	0.505	0.945344	0.801369	1.11518	NA	NA	NA	NA
AA_C_184_31346238_P	31346238	P	A	0.1554	0.1266	2.92e-05	1.26711	1.02663	1.41588	0.201	0.1578	0.0258	1.32035	1.03406	1.68592	0.2364	0.2037	0.498	0.1075	0.1584	1.11349	0.816308	1.51887		a	p	2.538e-06	---	0	0.684	0.793978	0.721271	0.874013	0.144015	0.131931	0.336	1.08764	0.916899	1.29019	0.2269	0.211	0.502	0.944957	0.801058	1.11471	NA	NA	NA	NA
AA_C_194_31346208_L	31346208	P	A	0.1554	0.1266	2.92e-05	1.26711	1.02663	1.41588	0.201	0.1579	0.0258	1.32035	1.03406	1.68592	0.2364	0.2036	0.494	0.1085	0.1584	1.1146	0.817124	1.52039		a	p	2.514e-06	---	0	0.6874	0.793898	0.721199	0.873926	0.14399	0.131915	0.336	1.08759	0.916852	1.29012	0.227	0.211	0.502	0.94493	0.801032	1.11468	NA	NA	NA	NA
AA_C_194_31346208_V	31346208	A	P	0.1555	0.1267	3.1e-05	1.26621	1.02655	1.41491	0.2017	0.1584	0.0252	1.32181	1.03519	1.68778	0.2367	0.2044	0.508	0.1048	0.1582	1.11049	0.814426	1.51418	99	a	p	2.709e-06	+++	0	0.673	1.25873	1.14346	1.38561	0.14399	0.131915	0.336	1.08759	0.916852	1.29012	0.2271	0.2111	0.504	0.945223	0.801271	1.11504	NA	NA	NA	NA
AA_C_21_31347564	31347564	H	R	0.3453	0.3715	0.00631	0.891625	0.990602	0.968129	0.2913	0.2854	0.271	0.891366	0.72628	1.09398	0.3674	0.3635	0.339	0.1332	0.1393	1.14248	0.869508	1.50114	99	h	r	0.009935	--+	-36.1	0.2301	0.907738	0.843412	0.976969	0.357259	0.355444	0.697	1.02451	0.907137	1.15708	0.3499	0.3497	0.501	1.04901	0.912678	1.20572	0.4209	0.3807	0.0262	0.845
AA_C_219_31346133_R	31346133	P	A	0.3992	0.3563	1.29e-06	1.22113	1.01629	1.32399	0.5431	0.5425	0.168	1.14416	0.944725	1.38569	0.4164	0.4239	0.722	-0.04793	0.13465	0.953201	0.732096	1.24108		a	p	2.452e-06	--+	-22.4	0.1952	0.841642	0.783381	0.904237	0.405655	0.379423	0.15	1.09192	0.968864	1.2306	0.4366	0.4371	0.163	0.907498	0.791798	1.0401	NA	NA	NA	NA
AA_C_219_31346133_W	31346133	A	P	0.3992	0.3564	1.33e-06	1.22076	1.01626	1.32358	0.5433	0.5427	0.167	1.14477	0.945263	1.38637	0.4166	0.4242	0.719	-0.04843	0.13461	0.952724	0.731787	1.24036	99	a	p	2.522e-06	++-	-22.4	0.1953	1.18792	1.10568	1.27626	0.405655	0.379423	0.15	1.09192	0.968864	1.2306	0.4369	0.4374	0.166	0.908102	0.792352	1.04076	NA	NA	NA	NA
AA_C_24_31347555	31347555	S	A	0.3756	0.3476	0.00168	1.13838	1.01053	1.23425	0.4161	0.3997	0.673	1.04159	0.86174	1.25898	0.4151	0.4022	0.769	-0.04051	0.13793	0.9603	0.732822	1.25839		a	s	0.004129	--+	0	0.3848	0.900415	0.838085	0.96738	0.31246	0.324654	0.0705	0.889993	0.784123	1.01016	0.4093	0.4242	0.0569	0.874898	0.762437	1.00395	0.3013	0.3064	0.824	1.018
AA_C_248_31346046_M	31346046	P	A	0.1585	0.1672	0.196	0.932217	0.992563	1.03682	0.1044	0.1241	0.0284	0.715052	0.529683	0.965293	0.1567	0.1696	0.462	-0.1335	0.1814	0.875027	0.613212	1.24863		a	p	0.03775	+++	-48.3	0.2595	1.10772	1.00589	1.21986	0.159291	0.185058	0.00198	0.782544	0.668729	0.91573	0.1576	0.1656	0.742	0.970404	0.811443	1.16051	NA	NA	NA	NA
AA_C_248_31346046_V	31346046	A	P	0.1587	0.1674	0.195	0.932068	0.992545	1.03668	0.105	0.1246	0.0296	0.716914	0.53127	0.967426	0.1568	0.1701	0.453	-0.1361	0.1814	0.872755	0.61162	1.24538	99	a	p	0.03751	---	-50.7	0.2653	0.902668	0.819688	0.99405	0.159291	0.185058	0.00198	0.782544	0.668729	0.91573	0.1585	0.1659	0.783	0.975195	0.81574	1.16582	NA	NA	NA	NA
AA_C_253_31346031_E	31346031	A	P	0.1557	0.1268	2.38e-05	1.27046	1.02694	1.41966	0.2059	0.1613	0.0194	1.33482	1.04764	1.70073	0.2378	0.2032	0.424	0.1272	0.159	1.13564	0.83157	1.55091	99	a	p	1.385e-06	+++	0	0.721	1.26681	1.1508	1.39451	0.145993	0.132652	0.271	1.10025	0.928464	1.30382	0.2281	0.2114	0.531	0.948531	0.80413	1.11886	NA	NA	NA	NA
AA_C_253_31346031_Q	31346031	P	A	0.1553	0.1266	2.73e-05	1.26828	1.02674	1.41724	0.2055	0.1609	0.0196	1.33456	1.04743	1.70039	0.2377	0.2028	0.42	0.1283	0.159	1.13689	0.832485	1.55261		a	p	1.573e-06	---	0	0.7259	0.790334	0.717961	0.870002	0.145993	0.132652	0.271	1.10025	0.928464	1.30382	0.2277	0.2111	0.53	0.94842	0.804035	1.11873	NA	NA	NA	NA
AA_C_261_31346007_M	31346007	P	A	0.1554	0.1266	2.72e-05	1.26833	1.02675	1.4173	0.2055	0.1609	0.0196	1.33456	1.04723	1.70072	0.2377	0.2028	0.419	0.1285	0.1591	1.13712	0.832488	1.55323		a	p	1.573e-06	---	0	0.7269	0.790334	0.717961	0.870002	0.144829	0.132904	0.344	1.08625	0.915559	1.28876	0.2278	0.2111	0.521	0.94733	0.803167	1.11737	NA	NA	NA	NA
AA_C_261_31346007_V	31346007	A	P	0.1555	0.1268	2.71e-05	1.26843	1.02676	1.41741	0.2064	0.1622	0.0207	1.33123	1.04461	1.69647	0.2379	0.2033	0.424	0.1271	0.159	1.13553	0.831487	1.55075	99	a	p	1.649e-06	+++	0	0.7285	1.26466	1.14885	1.39214	0.144829	0.132904	0.344	1.08625	0.915559	1.28876	0.2282	0.2114	0.531	0.948643	0.804241	1.11897	NA	NA	NA	NA
AA_C_267_31345989_P	31345989	A	P	0.1556	0.1269	2.72e-05	1.2684	1.02676	1.41741	0.2058	0.1612	0.0195	1.33469	1.04754	1.70056	0.2379	0.2032	0.424	0.1272	0.159	1.13564	0.83157	1.55091	99	a	p	1.581e-06	+++	0	0.7222	1.26529	1.14942	1.39283	0.144507	0.132496	0.341	1.0868	0.916067	1.28935	0.2282	0.2114	0.53	0.948512	0.804131	1.11882	NA	NA	NA	NA
AA_C_267_31345989_Q	31345989	P	A	0.1553	0.1266	2.72e-05	1.26834	1.02675	1.41729	0.2054	0.1609	0.0197	1.33442	1.04712	1.70055	0.2379	0.2032	0.424	0.1273	0.1591	1.13576	0.83149	1.55137		a	p	1.587e-06	---	0	0.7234	0.790413	0.718033	0.870089	0.144507	0.132496	0.341	1.0868	0.916067	1.28935	0.2278	0.2111	0.519	0.947188	0.80305	1.1172	NA	NA	NA	NA
AA_C_273_31345971_R	31345971	A	P	0.1556	0.1269	2.73e-05	1.26834	1.02675	1.41731	0.2057	0.1611	0.0195	1.33482	1.04764	1.70073	0.2378	0.2033	0.426	0.1267	0.159	1.13508	0.831154	1.55013	99	a	p	1.587e-06	+++	0	0.7205	1.26516	1.14931	1.39269	0.144506	0.132569	0.343	1.08635	0.915674	1.28883	0.2279	0.2112	0.522	0.947445	0.803263	1.11751	NA	NA	NA	NA
AA_C_273_31345971_S	31345971	P	A	0.1554	0.1266	2.72e-05	1.26833	1.02675	1.4173	0.2054	0.1608	0.0196	1.33469	1.04733	1.70089	0.2377	0.203	0.421	0.1279	0.1591	1.13644	0.831989	1.5523		a	p	1.579e-06	---	0	0.7248	0.790334	0.717961	0.870002	0.144506	0.132569	0.343	1.08635	0.915674	1.28883	0.2278	0.2111	0.519	0.947163	0.803028	1.11717	NA	NA	NA	NA
AA_C_275_31345841_E	31345841	A	P	0.1633	0.1697	0.257	0.940127	0.993424	1.04615	0.1831	0.2144	0.573	0.935055	0.740138	1.1813	0.1377	0.1792	0.0636	-0.3477	0.1875	0.706311	0.489094	1.02	99	a	p	0.08987	---	-85.1	0.3393	0.921917	0.839303	1.01266	0.161585	0.12175	3.55e-05	1.43277	1.20961	1.69711	0.1659	0.1513	0.582	0.948529	0.785927	1.14477	0.1207	0.1232	0.855	1.021
AA_C_275_31345841_G	31345841	P	A	0.1138	0.1068	0.274	1.07235	1.00878	1.21528	0.1206	0.1346	0.948	1.0095	0.761096	1.33899	0.0838	0.1119	0.206	-0.2862	0.2264	0.751112	0.481936	1.17063		a	p	0.4972	--+	-71	0.3106	0.962328	0.861449	1.07502	0.125711	0.0825422	9.13e-07	1.63169	1.34447	1.98029	0.0916	0.084	0.978	1.00342	0.788217	1.27737	0.09295	0.08221	0.275	0.868
AA_C_275_31345841_K	31345841	P	A	0.0493	0.0627	0.00142	0.749507	0.950199	0.894782	0.0632	0.0808	0.351	0.844087	0.591066	1.20542	0.0541	0.0697	0.174	-0.3667	0.2695	0.693018	0.40864	1.1753		a	p	0.0004241	+++	0	0.7891	1.31416	1.12896	1.52974	0.0359215	0.0392859	0.807	0.96198	0.70395	1.31459	0.0748	0.0677	0.412	0.892696	0.68077	1.17059	0.02778	0.04145	0.0494	1.544
AA_C_285_31345811_M	31345811	P	A	0.1554	0.1267	2.7e-05	1.26844	1.02676	1.41743	0.2052	0.1608	0.02	1.33336	1.04649	1.69886	0.2377	0.2029	0.42	0.1284	0.1591	1.13701	0.832405	1.55307		a	p	1.579e-06	---	0	0.7287	0.790334	0.717961	0.870002	0.144505	0.132617	0.347	1.08571	0.915129	1.28809	0.2277	0.2111	0.518	0.946995	0.802895	1.11696	NA	NA	NA	NA
AA_C_285_31345811_V	31345811	A	P	0.1557	0.127	2.75e-05	1.2682	1.02674	1.41719	0.2055	0.1612	0.02	1.33309	1.04649	1.69818	0.238	0.2036	0.427	0.1262	0.1591	1.13451	0.830576	1.54966	99	a	p	1.64e-06	+++	0	0.7224	1.26478	1.14896	1.39228	0.144505	0.132617	0.347	1.08571	0.915129	1.28809	0.2283	0.2115	0.535	0.949083	0.804631	1.11947	NA	NA	NA	NA
AA_C_295_31345781_A	31345781	A	P	0.1556	0.1269	2.75e-05	1.26818	1.02674	1.41713	0.2055	0.1612	0.0201	1.33269	1.04617	1.69768	0.2378	0.2034	0.426	0.1265	0.1591	1.13485	0.830825	1.55013	99	a	p	1.64e-06	+++	0	0.7241	1.26478	1.14896	1.39228	0.145451	0.133359	0.329	1.08916	0.917987	1.29225	0.2283	0.2115	0.536	0.949242	0.804769	1.11965	NA	NA	NA	NA
AA_C_295_31345781_V	31345781	P	A	0.1554	0.1267	2.7e-05	1.26847	1.02676	1.41743	0.2051	0.1608	0.0201	1.33296	1.04618	1.69835	0.2376	0.2027	0.417	0.1291	0.1591	1.1378	0.832988	1.55416		a	p	1.568e-06	---	0	0.7315	0.790334	0.717961	0.870002	0.145451	0.133359	0.329	1.08916	0.917987	1.29225	0.2277	0.2111	0.517	0.946922	0.802838	1.11686	NA	NA	NA	NA
AA_C_303_31345757_M	31345757	P	A	0.0483	0.0622	0.00112	0.7432	0.948381	0.888506	0.0581	0.0754	0.479	0.873716	0.601116	1.26994	0.0315	0.0436	0.13	-0.5261	0.3472	0.590905	0.299209	1.16697		a	p	0.0004544	+++	0	0.573	1.32379	1.13168	1.54852	0.0358362	0.0391566	0.815	0.963481	0.705128	1.31649	0.054	0.0544	0.527	0.905597	0.665922	1.23153	NA	NA	NA	NA
AA_C_303_31345757_V	31345757	A	P	0.0485	0.0624	0.00111	0.743014	0.948338	0.888283	0.0584	0.0754	0.488	0.875815	0.60197	1.27424	0.0317	0.0442	0.125	-0.5316	0.3462	0.587664	0.298152	1.1583	99	a	p	0.0004504	---	0	0.5608	0.755179	0.645584	0.88338	0.0358362	0.0391566	0.815	0.963481	0.705128	1.31649	0.0547	0.0549	0.546	0.90981	0.669303	1.23674	NA	NA	NA	NA
AA_C_304_31345754_M	31345754	P	A	0.237	0.2244	0.0488	1.0978	1.0087	1.20459	0.3333	0.37	0.886	0.985762	0.809626	1.20022	0.1786	0.2217	0.172	-0.2229	0.1632	0.800195	0.581135	1.10183		a	p	0.1875	-++	0.8	0.1333	0.946864	0.873066	1.0269	0.259773	0.246691	0.441	1.05407	0.92212	1.2049	0.2052	0.2234	0.246	0.908097	0.771692	1.06861	NA	NA	NA	NA
AA_C_304_31345754_V	31345754	A	P	0.2372	0.2246	0.0501	1.09722	1.00865	1.20397	0.3336	0.3704	0.886	0.985733	0.809649	1.20011	0.1788	0.2224	0.167	-0.2252	0.1631	0.798357	0.579914	1.09908	99	a	p	0.1924	+--	1.6	0.1311	1.05548	0.973221	1.1447	0.259773	0.246691	0.441	1.05407	0.92212	1.2049	0.2056	0.2237	0.25	0.908963	0.772516	1.06951	NA	NA	NA	NA
AA_C_305_31345751_A	31345751	A	P	0.1556	0.1269	2.76e-05	1.26814	1.02673	1.41709	0.2055	0.1608	0.0197	1.33349	1.04701	1.69836	0.2379	0.2035	0.429	0.1259	0.1591	1.13417	0.830327	1.5492	99	a	p	1.63e-06	+++	0	0.7206	1.26478	1.14896	1.39228	0.144588	0.1327	0.346	1.08589	0.915275	1.28832	0.2281	0.2111	0.524	0.947745	0.803518	1.11786	NA	NA	NA	NA
AA_C_305_31345751_T	31345751	P	A	0.1554	0.1267	2.7e-05	1.26846	1.02676	1.41744	0.2052	0.1603	0.0197	1.33376	1.04701	1.69903	0.2376	0.2026	0.415	0.1297	0.1592	1.13849	0.833325	1.5554		a	p	1.544e-06	---	0	0.732	0.790176	0.717817	0.869828	0.144588	0.1327	0.346	1.08589	0.915275	1.28832	0.2277	0.2109	0.518	0.947014	0.802933	1.11695	NA	NA	NA	NA
AA_C_306_31345748_A	31345748	P	A	0.1554	0.1267	2.72e-05	1.26832	1.02675	1.41729	0.2052	0.1603	0.0197	1.33362	1.04691	1.69886	0.2375	0.2027	0.418	0.1291	0.1592	1.1378	0.832825	1.55447		a	p	1.569e-06	---	0	0.7305	0.790334	0.717961	0.870002	0.144887	0.132894	0.339	1.08729	0.916446	1.28997	0.2277	0.2108	0.515	0.946716	0.80269	1.11659	NA	NA	NA	NA
AA_C_306_31345748_V	31345748	A	P	0.1556	0.1269	2.77e-05	1.26807	1.02673	1.41702	0.2055	0.1608	0.0198	1.33349	1.04701	1.69836	0.2377	0.2036	0.432	0.1251	0.1591	1.13326	0.829663	1.54796	99	a	p	1.649e-06	+++	0	0.7182	1.26466	1.14885	1.39214	0.144887	0.132894	0.339	1.08729	0.916446	1.28997	0.2281	0.2111	0.523	0.947657	0.803445	1.11775	NA	NA	NA	NA
AA_C_307_31345745_M	31345745	P	A	0.1554	0.1267	2.73e-05	1.2683	1.02675	1.41727	0.2052	0.1603	0.0197	1.33362	1.04691	1.69886	0.2375	0.2027	0.419	0.1286	0.1592	1.13724	0.832408	1.55369		a	p	1.577e-06	---	0	0.7289	0.790334	0.717961	0.870002	0.144303	0.132387	0.346	1.0859	0.915318	1.28828	0.2276	0.2108	0.514	0.94648	0.802495	1.1163	NA	NA	NA	NA
AA_C_307_31345745_V	31345745	A	P	0.1556	0.1269	2.76e-05	1.26814	1.02673	1.41709	0.2055	0.1607	0.0197	1.33362	1.04711	1.69853	0.2377	0.2037	0.438	0.1234	0.1591	1.13134	0.828254	1.54533	99	a	p	1.667e-06	+++	0	0.7126	1.26453	1.14873	1.392	0.144303	0.132387	0.346	1.0859	0.915318	1.28828	0.2279	0.211	0.525	0.947892	0.803657	1.11801	NA	NA	NA	NA
AA_C_326_31345141_C	31345141	P	A	0.1554	0.1267	2.73e-05	1.2683	1.02675	1.41727	0.2052	0.1603	0.0197	1.33376	1.04701	1.69903	0.2374	0.2025	0.417	0.1293	0.1592	1.13803	0.832991	1.55478		a	p	1.564e-06	---	0	0.7308	0.790334	0.717961	0.870002	0.145046	0.132705	0.317	1.0913	0.919912	1.29463	0.2276	0.2108	0.511	0.946132	0.802212	1.11587	NA	NA	NA	NA
AA_C_326_31345141_S	31345141	A	P	0.1556	0.1269	2.76e-05	1.26814	1.02674	1.41712	0.2055	0.1606	0.0196	1.33389	1.04712	1.6992	0.2378	0.2043	0.444	0.1219	0.159	1.12964	0.827174	1.54271	99	a	p	1.699e-06	+++	0	0.7072	1.26428	1.1485	1.39172	0.145046	0.132705	0.317	1.0913	0.919912	1.29463	0.2283	0.2116	0.518	0.946981	0.802815	1.11704	NA	NA	NA	NA
AA_C_339_31345102_A	31345102	A	P	0.1554	0.1268	2.77e-05	1.26805	1.02672	1.41696	0.2053	0.1605	0.0198	1.33336	1.0469	1.69819	0.2376	0.203	0.426	0.1266	0.1591	1.13496	0.830908	1.55028	99	a	p	1.625e-06	+++	0	0.7231	1.26478	1.14896	1.39228	0.143746	0.131959	0.335	1.08789	0.917148	1.29041	0.2278	0.211	0.517	0.946862	0.802789	1.11679	NA	NA	NA	NA
AA_C_339_31345102_T	31345102	P	A	0.1554	0.1267	2.73e-05	1.26833	1.02675	1.4173	0.2051	0.1603	0.0197	1.33376	1.04701	1.69903	0.2375	0.2025	0.417	0.1291	0.1592	1.1378	0.832825	1.55447		a	p	1.565e-06	---	0	0.7302	0.790334	0.717961	0.870002	0.143746	0.131959	0.335	1.08789	0.917148	1.29041	0.2275	0.2108	0.509	0.945918	0.802037	1.11561	NA	NA	NA	NA
AA_C_35_31347522	31347522	Q	R	0.1128	0.1051	0.241	1.07842	1.00957	1.22337	0.1228	0.1356	0.768	1.04316	0.787808	1.38127	0.0841	0.1116	0.202	-0.2895	0.2271	0.748638	0.47969	1.16838	99	q	r	0.404	++-	-67.2	0.3023	1.04854	0.938073	1.17202	0.126849	0.0826162	5.21e-07	1.64767	1.3582	1.99882	0.0919	0.0853	0.986	0.997781	0.783679	1.27038	0.09081	0.08106	0.31	0.875
AA_C_49_31347480	31347480	E	A	0.0483	0.0621	0.00115	0.743616	0.948475	0.889003	0.0579	0.0752	0.476	0.872406	0.599392	1.26978	0.0319	0.0449	0.0961	-0.5753	0.3458	0.562536	0.285627	1.1079		a	e	0.0004013	+++	0	0.5166	1.3275	1.13485	1.55286	0.0358362	0.0391566	0.815	0.963481	0.705128	1.31649	0.0544	0.0545	0.511	0.902663	0.664922	1.22541	0.02778	0.04076	0.056	1.526
AA_C_6_31347609	31347609	K	R	0.1602	0.1684	0.215	0.935205	0.992939	1.03955	0.1041	0.1236	0.0262	0.71113	0.526572	0.960374	0.1571	0.1718	0.422	-0.1457	0.1815	0.864417	0.605658	1.23373	99	k	r	0.03987	---	-37.6	0.2338	0.904204	0.821404	0.995351	0.159295	0.185032	0.00199	0.782677	0.66886	0.915862	0.1572	0.1652	0.741	0.970363	0.811551	1.16025	0.1774	0.1711	0.565	0.945
AA_C_66_31347429	31347429	N	K	0.0802	0.0625	0.000127	1.34021	1.04483	1.55671	0.0689	0.073	0.553	0.898166	0.629675	1.28114	0.035	0.0556	0.127	-0.5066	0.3323	0.602541	0.314143	1.1557		k	n	0.00357	-++	54.9	0.01182	0.818158	0.714806	0.936453	0.0344096	0.033176	0.844	0.968375	0.702873	1.33417	0.0514	0.0523	0.898	0.979653	0.716182	1.34005	0.08226	0.03219	2.28e-09	0.387
AA_C_73_31347408	31347408	A	T	0.2929	0.2796	0.0873	1.07948	1.00673	1.17842	0.4318	0.4243	0.233	1.12452	0.927258	1.36376	0.3595	0.3385	0.967	-0.005705	0.136038	0.994311	0.761596	1.29814	99	a	t	0.05099	++-	0	0.7643	1.07907	0.99966	1.16479	0.28096	0.303576	0.0814	0.891046	0.782296	1.01491	0.3808	0.3779	0.107	0.891967	0.77611	1.02512	0.2479	0.3025	0.0007	1.338
AA_C_77_31347396	31347396	N	S	0.1661	0.1655	0.604	1.02845	1.00298	1.14345	0.243	0.275	0.673	0.954116	0.766875	1.18707	0.1033	0.1464	0.0258	-0.4467	0.2004	0.639736	0.431933	0.947512	99	n	s	0.8017	+--	25.3	0.06883	0.988171	0.900678	1.08416	0.0812873	0.0841383	0.499	0.929264	0.75076	1.15021	0.1437	0.1633	0.0261	0.804324	0.663899	0.974451	0.1165	0.08314	0.00278	0.693
AA_C_80_31347387	31347387	K	N	0.166	0.1655	0.612	1.02781	1.00291	1.14276	0.2433	0.2749	0.676	0.954536	0.767197	1.18762	0.1033	0.1466	0.0254	-0.4476	0.2002	0.63916	0.431714	0.946288	99	k	n	0.7935	+--	25.4	0.06851	0.987677	0.900227	1.08362	0.0812873	0.0841459	0.498	0.929104	0.750625	1.15002	0.1438	0.1633	0.0262	0.804422	0.663997	0.974545	0.1165	0.08314	0.00278	0.693
AA_C_9_31347600_D	31347600	P	A	0.2146	0.1783	2.82e-07	1.29585	1.02597	1.4306	0.3116	0.2756	0.04	1.24396	1.01	1.53211	0.2584	0.2325	0.802	0.03804	0.15172	1.03877	0.771567	1.39852		a	p	8.402e-08	---	0	0.3793	0.791362	0.726402	0.862131	0.153142	0.139602	0.335	1.08611	0.918742	1.28396	0.2513	0.2586	0.057	0.85868	0.733982	1.00456	0.1239	0.1352	0.342	1.115
AA_C_9_31347600_F	31347600	P	A	0.1602	0.1684	0.215	0.935279	0.992948	1.03962	0.104	0.1235	0.0262	0.711201	0.526624	0.960471	0.157	0.1714	0.429	-0.1435	0.1814	0.866321	0.607111	1.2362		a	p	0.04031	+++	-37.9	0.2345	1.10572	1.00447	1.21718	0.159295	0.185032	0.00199	0.782674	0.668857	0.915859	0.1572	0.1651	0.739	0.970074	0.81126	1.15998	0.1774	0.1711	0.565	0.945
AA_C_9_31347600_S	31347600	P	A	0.1694	0.1936	0.00181	0.849438	0.983412	0.941132	0.1181	0.1233	0.679	1.06189	0.799352	1.41065	0.0874	0.0941	0.232	-0.2758	0.2308	0.758965	0.482793	1.19312		a	p	0.002866	+-+	-63.7	0.2947	1.15431	1.05046	1.26843	0.153584	0.177711	0.202	0.901125	0.767533	1.05797	0.1049	0.0936	0.0223	1.30052	1.03803	1.62939	0.1335	0.2131	3.73e-07	1.722
AA_C_9_31347600_Y	31347600	P	A	0.4558	0.4597	0.566	0.977155	0.998178	1.05741	0.467	0.4785	0.484	0.934055	0.771485	1.13088	0.4988	0.5114	0.501	0.09113	0.13534	1.09541	0.840182	1.42817		a	p	0.5551	++-	0	0.6302	1.02143	0.952025	1.09589	0.533737	0.497458	0.00933	1.16705	1.03854	1.31145	0.4864	0.4832	0.628	1.03359	0.904147	1.18156	0.5652	0.4805	3.01e-05	0.732
AA_C_-9_31347781_A	31347781	A	P	0.1556	0.1269	3.2e-05	1.26563	1.0265	1.41423	0.1979	0.1564	0.0403	1.29149	1.01145	1.64907	0.2375	0.2024	0.452	0.1185	0.1576	1.12581	0.826632	1.53326	99	a	p	3.5e-06	+++	0	0.7595	1.25533	1.14038	1.38187	0.144215	0.132171	0.336	1.08756	0.91695	1.28992	0.2265	0.2111	0.502	0.944972	0.801109	1.11467	NA	NA	NA	NA
AA_C_-9_31347781_G	31347781	P	A	0.1554	0.1267	3.17e-05	1.26574	1.02651	1.41436	0.1975	0.1557	0.04	1.29188	1.01176	1.64957	0.237	0.2019	0.451	0.1192	0.1579	1.1266	0.826724	1.53524		a	p	3.438e-06	---	0	0.7619	0.796443	0.723511	0.876727	0.144215	0.132171	0.336	1.08756	0.91695	1.28992	0.2263	0.2107	0.5	0.944724	0.800898	1.11438	NA	NA	NA	NA
AA_C_90_31347357	31347357	D	A	0.2659	0.2434	0.00397	1.1433	1.01228	1.25237	0.3756	0.3574	0.156	1.15408	0.946621	1.40699	0.3121	0.3013	0.647	-0.06486	0.14165	0.937199	0.709997	1.23711		a	d	0.003233	--+	0	0.3974	0.88763	0.819894	0.960962	0.189057	0.179105	0.455	1.0602	0.909619	1.2357	0.3273	0.3267	0.0302	0.850522	0.734708	0.984592	0.1517	0.176	0.0703	1.205
AA_C_91_31347104	31347104	R	G	0.1168	0.1166	0.565	0.964602	0.995584	1.09063	0.0978	0.0835	0.979	0.995497	0.714231	1.38753	0.0511	0.0403	0.195	0.42959	0.3311	1.53663	0.803028	2.9404		g	r	0.7538	++-	0	0.3835	1.01826	0.909024	1.14063	0.138521	0.136546	0.433	1.07086	0.902868	1.27012	0.0606	0.0612	0.265	1.174	0.885257	1.55691	0.1538	0.1211	0.02	0.777
AA_C_94_31347095	31347095	I	T	0.3063	0.3099	0.577	0.976247	0.99797	1.06234	0.2756	0.2572	0.758	0.967451	0.78376	1.1942	0.3453	0.3373	0.266	0.1584	0.1424	1.17163	0.886296	1.54884		t	i	0.7584	++-	0	0.4611	1.01197	0.938418	1.09129	0.31515	0.290225	0.0506	1.13424	0.99986	1.28669	0.3151	0.3297	0.981	1.00177	0.86895	1.1549	0.3782	0.273	8.14e-09	0.635
AA_C_95_31347092_F	31347092	P	A	0.0079	0.0088	0.555	0.877069	0.944468	1.35581	0.0177	0.0147	0.125	1.82449	0.846017	3.93463	0.0094	0.0056	0.771	0.2492	0.8556	1.283	0.239842	6.86322		a	p	0.7635	+--	-48.5	0.26	0.944877	0.652884	1.36746	0.0147901	0.00946644	0.00629	2.1877	1.26191	3.79271	0.0183	0.0077	0.717	1.13687	0.567654	2.27686	0.01389	0.01158	0.439	0.77
AA_C_95_31347092_I	31347092	P	A	0.2483	0.2419	0.945	0.996808	0.999709	1.09167	0.2334	0.2218	0.717	0.958879	0.764056	1.20338	0.2445	0.2174	0.0933	0.2614	0.1558	1.29875	0.956985	1.76256		a	p	0.7984	++-	-38.6	0.2362	0.989456	0.91216	1.0733	0.312873	0.284631	0.0215	1.16065	1.02246	1.31752	0.2254	0.2222	0.24	1.1003	0.938245	1.29034	0.3718	0.2663	7.7e-09	0.633
AA_C_95_31347092_L	31347092	A	P	0.2562	0.2507	0.845	0.991091	0.999195	1.08437	0.2503	0.2357	0.953	1.00666	0.806292	1.25682	0.2532	0.2191	0.057	0.295547	0.15531	1.34386	0.991179	1.82204	99	a	p	0.7267	-++	-13	0.1703	1.0144	0.936075	1.09929	0.327663	0.294097	0.00406	1.20249	1.06059	1.36336	0.2431	0.2294	0.213	1.10513	0.944158	1.29354	0.3857	0.2779	2.87e-09	0.624
AA_C_97_31347086	31347086	W	R	0.3491	0.3594	0.514	0.972738	0.997706	1.05703	0.31	0.3203	0.738	0.965982	0.788729	1.18307	0.2473	0.2697	0.165	-0.2176	0.1567	0.804447	0.591714	1.09366		r	w	0.2958	+++	0	0.5035	1.0406	0.965725	1.12129	0.287323	0.33237	0.000687	0.804011	0.708222	0.912755	0.2514	0.2656	0.492	1.05416	0.906985	1.22522	0.2981	0.3546	0.00498	1.255
AA_C_99_31347080_C	31347080	P	A	0.1602	0.1684	0.215	0.935261	0.992945	1.03962	0.1045	0.1238	0.0273	0.713267	0.528361	0.962882	0.157	0.1716	0.417	-0.1472	0.1814	0.863121	0.604869	1.23164		a	p	0.04019	+++	-40	0.2396	1.10583	1.00457	1.21731	0.159295	0.185032	0.00199	0.782674	0.668857	0.915859	0.1575	0.1654	0.726	0.968535	0.809883	1.15827	0.1774	0.1711	0.565	0.945
AA_C_99_31347080_F	31347080	P	A	0.1703	0.1941	0.00209	0.85159	0.983698	0.943331	0.1234	0.1293	0.851	1.02702	0.778134	1.35551	0.11	0.1201	0.226	-0.2489	0.2056	0.779658	0.521067	1.16658		a	p	0.002477	+-+	0	0.4036	1.15512	1.05222	1.26807	0.153986	0.178004	0.206	0.902055	0.768284	1.05912	0.1258	0.1067	0.0466	1.24048	1.00325	1.53381	0.1335	0.2133	3.67e-07	1.723
AA_C_99_31347080_S	31347080	P	A	0.1038	0.0848	0.00158	1.23668	1.02839	1.41089	0.1623	0.1231	0.0283	1.3531	1.03264	1.77302	0.2203	0.1943	0.58	0.09006	0.1627	1.09424	0.795462	1.50524		a	p	0.0001729	---	0	0.6092	0.808318	0.723299	0.903329	0.128555	0.12199	0.898	1.01162	0.847463	1.20757	0.1951	0.193	0.283	0.910305	0.76678	1.08069	0.1058	0.1183	0.245	1.153
AA_C_99_31347080_Y	31347080	A	P	0.4343	0.4471	0.12	0.939066	0.99503	1.01651	0.3885	0.3747	0.833	1.02132	0.839047	1.2432	0.486	0.4788	0.52	-0.08612	0.13389	0.917484	0.705715	1.1928	99	a	p	0.1371	-+-	0	0.7167	0.947716	0.882977	1.0172	0.441875	0.485047	0.00153	0.828631	0.737432	0.931108	0.4772	0.4641	0.867	1.01135	0.886115	1.15428	0.5833	0.4972	1.73e-05	1.383
AA_DPA1_1_33149231	33149231	x	I	0.5099	0.4507	4.4e-09	1.26794	1.019	1.37255	0.5054	0.4759	0.486	1.07132	0.882607	1.30038	0.623	0.5988	0.385	0.1187	0.1367	1.12603	0.861369	1.47201		i	x	1.049e-08	---	-36.4	0.2307	0.813345	0.757785	0.872979	0.506219	0.456942	2.12e-05	1.29794	1.15046	1.46432	0.6201	0.5996	0.644	0.967364	0.840416	1.11349	0.4947	0.4375	0.00127	0.781
AA_DPA1_-1_33149234	33149234	A	x	0.3609	0.4309	4.76e-13	0.742992	0.976365	0.80529	0.3535	0.3886	0.296	0.902425	0.74447	1.09389	0.2811	0.3046	0.29	-0.1546	0.1461	0.856758	0.643421	1.14083	99	a	x	1.129e-12	---	-2.5	0.1421	0.770358	0.716891	0.827813	0.353707	0.385988	0.00417	0.838254	0.742578	0.946256	0.2766	0.2981	0.829	1.01676	0.87454	1.18211	0.359	0.4055	0.0142	1.215
AA_DPA1_-10_33149261	33149261	F	x	0.3609	0.431	4.52e-13	0.742747	0.976339	0.805024	0.3535	0.3886	0.296	0.902425	0.74447	1.09389	0.2811	0.3046	0.29	-0.1546	0.1461	0.856758	0.643421	1.14083	99	f	x	1.072e-12	---	-2.1	0.1411	0.770127	0.716676	0.827565	0.353717	0.385978	0.00419	0.838335	0.742648	0.946351	0.2766	0.2981	0.829	1.01676	0.874541	1.18211	0.359	0.4055	0.0142	1.215
AA_DPA1_11_33145617	33145617	M	A	0.5085	0.4516	1.07e-08	1.26034	1.01851	1.36433	0.491	0.4557	0.345	1.0979	0.904241	1.33304	0.5951	0.5574	0.232	0.16	0.1339	1.17351	0.902629	1.52569		a	m	8.164e-09	---	0	0.4061	0.812288	0.7568	0.871845	0.506126	0.456978	2.31e-05	1.29662	1.14919	1.46297	0.597	0.573	0.831	1.01544	0.882288	1.16868	0.4776	0.4372	0.0173	0.833
AA_DPA1_-11_33149264	33149264	A	x	0.3609	0.4309	4.76e-13	0.742992	0.976365	0.80529	0.3535	0.3886	0.296	0.902425	0.74447	1.09389	0.2811	0.3046	0.29	-0.1546	0.1461	0.856758	0.643421	1.14083	99	a	x	1.129e-12	---	-2.5	0.1421	0.770358	0.716891	0.827813	0.353736	0.385992	0.0042	0.838361	0.742673	0.946378	0.2766	0.2981	0.829	1.01676	0.874541	1.18211	0.359	0.4055	0.0142	1.215
AA_DPA1_111_33144977	33144977	K	R	0.3704	0.4424	2.23e-13	0.74013	0.97609	0.802109	0.3686	0.4089	0.209	0.885016	0.731583	1.07063	0.309	0.3459	0.167	-0.1941	0.1405	0.823576	0.625327	1.08467	99	k	r	1.898e-13	---	-26	0.2044	0.764525	0.711742	0.821223	0.352815	0.385866	0.00346	0.835213	0.739863	0.94285	0.3019	0.3241	0.783	0.979417	0.844811	1.13547	0.3568	0.405	0.0106	1.225
AA_DPA1_-12_33149267	33149267	L	x	0.3609	0.4309	4.76e-13	0.742992	0.976365	0.80529	0.3535	0.3886	0.296	0.902425	0.74447	1.09389	0.2811	0.3046	0.29	-0.1546	0.1461	0.856758	0.643421	1.14083	99	l	x	1.129e-12	---	-2.5	0.1421	0.770358	0.716891	0.827813	0.35377	0.386018	0.0042	0.838394	0.742711	0.946404	0.2766	0.2981	0.829	1.01676	0.874541	1.18211	0.359	0.4055	0.0142	1.215
AA_DPA1_127_33144929	33144929	L	P	0.3673	0.4398	1.59e-13	0.738474	0.975885	0.800392	0.3542	0.3933	0.216	0.885564	0.730618	1.07337	0.2812	0.3048	0.29	-0.1545	0.1461	0.856843	0.643485	1.14094	99	l	p	2.518e-13	---	-12.2	0.1683	0.764602	0.711534	0.821628	0.352675	0.385758	0.00342	0.835075	0.739757	0.942675	0.2784	0.2986	0.756	1.02408	0.881175	1.19017	0.3558	0.4046	0.00961	1.228
AA_DPA1_-13_33149270	33149270	S	x	0.3609	0.4309	4.76e-13	0.742992	0.976365	0.80529	0.3535	0.3886	0.296	0.902425	0.74447	1.09389	0.2811	0.3046	0.29	-0.1546	0.1461	0.856758	0.643421	1.14083	99	s	x	1.129e-12	---	-2.5	0.1421	0.770358	0.716891	0.827813	0.353767	0.386014	0.0042	0.8384	0.742715	0.946411	0.2766	0.2981	0.829	1.01676	0.874541	1.18211	0.359	0.4055	0.0142	1.215
AA_DPA1_-14_33149273	33149273	L	x	0.3609	0.4309	4.76e-13	0.742992	0.976365	0.80529	0.3535	0.3886	0.296	0.902425	0.74447	1.09389	0.2811	0.3046	0.29	-0.1546	0.1461	0.856758	0.643421	1.14083	99	l	x	1.129e-12	---	-2.5	0.1421	0.770358	0.716891	0.827813	0.35372	0.385983	0.00419	0.83834	0.742652	0.946355	0.2766	0.2981	0.829	1.01676	0.874541	1.18211	0.359	0.4055	0.0142	1.215
AA_DPA1_-15_33149276	33149276	A	x	0.3609	0.4309	4.76e-13	0.742992	0.976365	0.80529	0.3535	0.3886	0.296	0.902425	0.74447	1.09389	0.2811	0.3046	0.29	-0.1546	0.1461	0.856758	0.643421	1.14083	99	a	x	1.129e-12	---	-2.5	0.1421	0.770358	0.716891	0.827813	0.353734	0.38599	0.0042	0.838371	0.742684	0.946388	0.2766	0.2981	0.829	1.01676	0.874541	1.18211	0.359	0.4055	0.0142	1.215
AA_DPA1_-16_33149279	33149279	R	x	0.3609	0.4309	4.76e-13	0.742992	0.976365	0.80529	0.3535	0.3886	0.296	0.902425	0.74447	1.09389	0.2811	0.3046	0.29	-0.1546	0.1461	0.856758	0.643421	1.14083	99	r	x	1.129e-12	---	-2.5	0.1421	0.770358	0.716891	0.827813	0.35373	0.385993	0.00419	0.838331	0.742648	0.946341	0.2766	0.2981	0.829	1.01676	0.874541	1.18211	0.359	0.4055	0.0142	1.215
AA_DPA1_160_33144830	33144830	F	V	0.3673	0.4398	1.59e-13	0.738474	0.975885	0.800392	0.3542	0.3933	0.216	0.885564	0.730618	1.07337	0.2812	0.3048	0.29	-0.1545	0.1461	0.856843	0.643485	1.14094	99	f	v	2.518e-13	---	-12.2	0.1683	0.764602	0.711534	0.821628	0.352673	0.385757	0.00342	0.835073	0.739755	0.942672	0.2784	0.2986	0.757	1.02406	0.881154	1.19014	0.3558	0.4046	0.00961	1.228
AA_DPA1_-17_33149282	33149282	L	x	0.3609	0.4309	4.76e-13	0.742992	0.976365	0.80529	0.3535	0.3886	0.296	0.902425	0.74447	1.09389	0.2811	0.3046	0.29	-0.1546	0.1461	0.856758	0.643421	1.14083	99	l	x	1.129e-12	---	-2.5	0.1421	0.770358	0.716891	0.827813	0.353766	0.386014	0.0042	0.838397	0.742712	0.946408	0.2766	0.2981	0.829	1.01676	0.874541	1.18211	0.359	0.4055	0.0142	1.215
AA_DPA1_18_33145596	33145596	T	P	0.0032	0.0026	0.722	1.13763	1.09594	2.31491	0.0144	0.0156	0.901	0.953105	0.446894	2.03272	0.0278	0.0411	0.339	-0.3563	0.3723	0.700263	0.337561	1.45268	99	t	p	0.6804	+--	0	0.6414	0.915029	0.59967	1.39623	NA	NA	NA	NA	NA	NA	0.0234	0.0254	0.0802	0.671734	0.430137	1.04903	0.001068	0	0.967	0
AA_DPA1_-18_33149285	33149285	I	x	0.3609	0.4309	4.76e-13	0.742992	0.976365	0.80529	0.3535	0.3886	0.296	0.902425	0.74447	1.09389	0.2811	0.3046	0.29	-0.1546	0.1461	0.856758	0.643421	1.14083	99	i	x	1.129e-12	---	-2.5	0.1421	0.770358	0.716891	0.827813	0.35366	0.385934	0.00417	0.838234	0.742549	0.94625	0.2766	0.2981	0.829	1.01676	0.874541	1.18211	0.359	0.4055	0.0142	1.215
AA_DPA1_-19_33149288	33149288	V	x	0.3609	0.4309	4.76e-13	0.742992	0.976365	0.80529	0.3535	0.3886	0.296	0.902425	0.74447	1.09389	0.2811	0.3046	0.29	-0.1546	0.1461	0.856758	0.643421	1.14083	99	v	x	1.129e-12	---	-2.5	0.1421	0.770358	0.716891	0.827813	0.353763	0.386032	0.00418	0.838298	0.742628	0.946294	0.2766	0.2981	0.829	1.01676	0.874541	1.18211	0.359	0.4055	0.0142	1.215
AA_DPA1_190_33144526	33144526	A	T	0.0032	0.0026	0.699	1.15183	1.10662	2.35859	0.0144	0.0156	0.899	0.952276	0.446445	2.03123	0.028	0.0411	0.349	-0.3483	0.3722	0.705887	0.340339	1.46406	99	a	t	0.6996	+--	0	0.6401	0.919983	0.602208	1.40544	NA	NA	NA	NA	NA	NA	0.0235	0.0254	0.0817	0.672368	0.430036	1.05126	0.001068	0	0.967	0
AA_DPA1_2_33149228	33149228	x	K	0.5098	0.4506	4.51e-09	1.26763	1.01897	1.3722	0.5053	0.476	0.487	1.0711	0.88243	1.30012	0.623	0.5988	0.385	0.1187	0.1367	1.12603	0.861369	1.47201		k	x	1.078e-08	---	-36.5	0.2311	0.813508	0.757936	0.873153	0.506416	0.457028	2.04e-05	1.29863	1.15104	1.46513	0.62	0.5994	0.655	0.968445	0.841343	1.11475	0.4947	0.4375	0.00127	0.781
AA_DPA1_-2_33149237	33149237	G	x	0.3609	0.4309	4.76e-13	0.742992	0.976365	0.80529	0.3535	0.3886	0.296	0.902425	0.74447	1.09389	0.2811	0.3046	0.29	-0.1546	0.1461	0.856758	0.643421	1.14083	99	g	x	1.129e-12	---	-2.5	0.1421	0.770358	0.716891	0.827813	0.353716	0.385975	0.00419	0.838329	0.742646	0.94634	0.2766	0.2981	0.829	1.01676	0.874541	1.18211	0.359	0.4055	0.0142	1.215
AA_DPA1_-20_33149291	33149291	A	x	0.3609	0.4309	4.76e-13	0.742992	0.976365	0.80529	0.3535	0.3886	0.296	0.902425	0.74447	1.09389	0.2811	0.3046	0.29	-0.1546	0.1461	0.856758	0.643421	1.14083	99	a	x	1.129e-12	---	-2.5	0.1421	0.770358	0.716891	0.827813	0.353666	0.386024	0.00405	0.837792	0.742174	0.94573	0.2766	0.2981	0.829	1.01676	0.874541	1.18211	0.359	0.4055	0.0142	1.215
AA_DPA1_-21_33149294	33149294	R	x	0.3609	0.4309	4.76e-13	0.742992	0.976365	0.80529	0.3535	0.3886	0.296	0.902425	0.74447	1.09389	0.2811	0.3046	0.29	-0.1546	0.1461	0.856758	0.643421	1.14083	99	r	x	1.129e-12	---	-2.5	0.1421	0.770358	0.716891	0.827813	0.353743	0.385989	0.0042	0.838372	0.742686	0.946386	0.2766	0.2981	0.829	1.01676	0.874541	1.18211	0.359	0.4055	0.0142	1.215
AA_DPA1_-22_33149297	33149297	I	x	0.3609	0.4309	4.67e-13	0.742918	0.976357	0.805209	0.3535	0.3886	0.296	0.902425	0.74447	1.09389	0.2811	0.3046	0.29	-0.1546	0.1461	0.856758	0.643421	1.14083	99	i	x	1.112e-12	---	-2.4	0.1418	0.770281	0.716819	0.82773	0.353719	0.385978	0.0042	0.838345	0.742656	0.946363	0.2766	0.2981	0.829	1.01676	0.874541	1.18211	0.359	0.4055	0.0142	1.215
AA_DPA1_228_33144412	33144412	T	P	0.3673	0.4398	1.61e-13	0.738533	0.975892	0.800456	0.3542	0.3932	0.216	0.885609	0.73064	1.07345	0.281	0.3048	0.286	-0.1558	0.1461	0.85573	0.642649	1.13946	99	t	p	2.512e-13	---	-12.7	0.1696	0.764602	0.711534	0.821628	0.352673	0.385757	0.00342	0.835073	0.739755	0.942672	0.2784	0.2987	0.756	1.02409	0.881178	1.19019	0.3558	0.4046	0.00961	1.228
AA_DPA1_-23_33149300	33149300	H	x	0.3609	0.4309	4.76e-13	0.742992	0.976365	0.80529	0.3535	0.3886	0.296	0.902425	0.74447	1.09389	0.2811	0.3046	0.29	-0.1546	0.1461	0.856758	0.643421	1.14083	99	h	x	1.129e-12	---	-2.5	0.1421	0.770358	0.716891	0.827813	0.353778	0.386025	0.0042	0.838391	0.742709	0.9464	0.2766	0.2981	0.829	1.01676	0.874541	1.18211	0.359	0.4055	0.0142	1.215
AA_DPA1_-24_33149303	33149303	F	x	0.3609	0.4309	4.76e-13	0.742992	0.976365	0.80529	0.3535	0.3886	0.296	0.902425	0.74447	1.09389	0.2811	0.3046	0.29	-0.1546	0.1461	0.856758	0.643421	1.14083	99	f	x	1.129e-12	---	-2.5	0.1421	0.770358	0.716891	0.827813	0.353662	0.385937	0.00418	0.838269	0.742578	0.946291	0.2766	0.2981	0.829	1.01676	0.874541	1.18211	0.359	0.4055	0.0142	1.215
AA_DPA1_-25_33149306	33149306	M	x	0.3609	0.4309	4.76e-13	0.742992	0.976365	0.80529	0.3535	0.3886	0.296	0.902425	0.74447	1.09389	0.2811	0.3046	0.29	-0.1546	0.1461	0.856758	0.643421	1.14083	99	m	x	1.129e-12	---	-2.5	0.1421	0.770358	0.716891	0.827813	0.353726	0.385989	0.00418	0.838285	0.742606	0.946292	0.2766	0.2981	0.829	1.01676	0.874541	1.18211	0.359	0.4055	0.0142	1.215
AA_DPA1_-26_33149309	33149309	R	x	0.3609	0.4309	4.76e-13	0.742992	0.976365	0.80529	0.3535	0.3886	0.296	0.902425	0.74447	1.09389	0.2811	0.3046	0.29	-0.1546	0.1461	0.856758	0.643421	1.14083	99	r	x	1.129e-12	---	-2.5	0.1421	0.770358	0.716891	0.827813	0.353747	0.385998	0.0042	0.838384	0.742695	0.946401	0.2766	0.2981	0.829	1.01676	0.874541	1.18211	0.359	0.4055	0.0142	1.215
AA_DPA1_-27_33149312	33149312	D	x	0.3609	0.4309	4.78e-13	0.743007	0.976366	0.805306	0.3535	0.3886	0.296	0.902425	0.74447	1.09389	0.2811	0.3046	0.29	-0.1546	0.1461	0.856758	0.643421	1.14083	99	d	x	1.133e-12	---	-2.5	0.1422	0.770358	0.716891	0.827813	0.353724	0.385979	0.0042	0.838368	0.742676	0.946389	0.2766	0.2981	0.829	1.01676	0.874541	1.18211	0.359	0.4055	0.0142	1.215
AA_DPA1_28_33145566	33145566	D	E	0.0049	0.0042	0.65	1.14202	1.07914	2.02647	0.0151	0.0203	0.412	0.741115	0.36226	1.51618	0.0279	0.0413	0.338	-0.3568	0.3724	0.699912	0.337326	1.45224	99	d	e	0.5247	+--	0	0.4985	0.883557	0.603257	1.2941	NA	NA	NA	NA	NA	NA	0.0235	0.0265	0.056	0.649803	0.417592	1.01114	0.001068	0	0.967	0
AA_DPA1_-28_33149315	33149315	E	x	0.3609	0.4309	4.76e-13	0.742985	0.976364	0.805282	0.3535	0.3886	0.296	0.902425	0.74447	1.09389	0.2811	0.3046	0.29	-0.1546	0.1461	0.856758	0.643421	1.14083	99	e	x	1.127e-12	---	-2.5	0.1421	0.770281	0.716819	0.82773	0.353743	0.385994	0.0042	0.83838	0.742691	0.946398	0.2766	0.2981	0.829	1.01676	0.874541	1.18211	0.359	0.4055	0.0142	1.215
AA_DPA1_-29_33149318	33149318	P	x	0.3609	0.4309	4.76e-13	0.742992	0.976365	0.80529	0.3536	0.3886	0.296	0.902398	0.744433	1.09388	0.2811	0.3046	0.29	-0.1546	0.1461	0.856758	0.643421	1.14083	99	p	x	1.128e-12	---	-2.5	0.1422	0.770281	0.716819	0.82773	0.35375	0.386005	0.0042	0.838359	0.742675	0.946371	0.2766	0.2981	0.829	1.01677	0.874545	1.18212	0.359	0.4055	0.0142	1.215
AA_DPA1_3_33145641	33145641	x	A	0.5148	0.458	1.21e-08	1.25758	1.01823	1.36073	0.506	0.476	0.474	1.07339	0.884138	1.30315	0.623	0.5987	0.386	0.1185	0.1367	1.12581	0.861197	1.47172		a	x	2.389e-08	---	-54.7	0.2745	0.81824	0.762644	0.877888	0.506604	0.457389	2.29e-05	1.29678	1.14934	1.46313	0.6206	0.5996	0.692	0.971958	0.844407	1.11878	0.4776	0.4372	0.0173	0.833
AA_DPA1_-3_33149240	33149240	A	x	0.3609	0.4309	4.76e-13	0.742992	0.976365	0.80529	0.3535	0.3886	0.296	0.902425	0.74447	1.09389	0.2811	0.3046	0.29	-0.1546	0.1461	0.856758	0.643421	1.14083	99	a	x	1.129e-12	---	-2.5	0.1421	0.770358	0.716891	0.827813	0.353728	0.385984	0.0042	0.838366	0.742679	0.946382	0.2766	0.2981	0.829	1.01676	0.874541	1.18211	0.359	0.4055	0.0142	1.215
AA_DPA1_-30_33149321	33149321	R	x	0.3613	0.4317	3.61e-13	0.741708	0.976217	0.803929	0.3537	0.3888	0.297	0.902614	0.744568	1.09421	0.2816	0.3054	0.287	-0.1557	0.1463	0.855816	0.642462	1.14002	99	r	x	8.749e-13	---	-0.8	0.1375	0.769203	0.715816	0.826572	0.353732	0.385986	0.0042	0.83836	0.74267	0.946378	0.2771	0.2987	0.831	1.01652	0.874239	1.18196	0.359	0.4055	0.0142	1.215
AA_DPA1_31_33145557	33145557	M	Q	0.3672	0.4372	4.74e-13	0.742747	0.976316	0.805087	0.3686	0.4083	0.212	0.885662	0.732046	1.07151	0.309	0.3458	0.167	-0.1941	0.1405	0.823576	0.625327	1.08467	99	m	q	3.846e-13	---	-30.8	0.2168	0.766822	0.71374	0.823852	0.352834	0.385884	0.00343	0.835057	0.739721	0.942679	0.3014	0.3246	0.719	0.973218	0.839499	1.12824	0.3558	0.4046	0.00961	1.228
AA_DPA1_-31_33149324	33149324	M	x	0.3609	0.4309	4.76e-13	0.742985	0.976364	0.805282	0.3535	0.3886	0.296	0.902425	0.74447	1.09389	0.2811	0.3046	0.29	-0.1546	0.1461	0.856758	0.643421	1.14083	99	m	x	1.127e-12	---	-2.5	0.1421	0.770281	0.716819	0.82773	0.353741	0.385993	0.0042	0.838377	0.742687	0.946396	0.2766	0.2982	0.829	1.01673	0.874504	1.18208	0.359	0.4055	0.0142	1.215
AA_DPA1_4_33145638	33145638	x	D	0.5148	0.458	1.22e-08	1.25753	1.01823	1.36068	0.506	0.476	0.474	1.07339	0.884138	1.30315	0.623	0.5987	0.386	0.1185	0.1367	1.12581	0.861197	1.47172		d	x	2.401e-08	---	-54.8	0.2747	0.81824	0.762644	0.877888	0.507031	0.457849	2.29e-05	1.29718	1.14953	1.46379	0.6206	0.5996	0.691	0.971891	0.844365	1.11868	0.4776	0.4372	0.0173	0.833
AA_DPA1_-4_33149243	33149243	G	x	0.3609	0.4309	4.76e-13	0.742992	0.976365	0.80529	0.3535	0.3886	0.296	0.902425	0.74447	1.09389	0.2811	0.3046	0.29	-0.1546	0.1461	0.856758	0.643421	1.14083	99	g	x	1.129e-12	---	-2.5	0.1421	0.770358	0.716891	0.827813	0.353677	0.385962	0.00417	0.838228	0.742549	0.946235	0.2766	0.2981	0.829	1.01676	0.874541	1.18211	0.359	0.4055	0.0142	1.215
AA_DPA1_5_33145635	33145635	x	H	0.5147	0.4579	1.22e-08	1.25758	1.01824	1.36076	0.506	0.476	0.474	1.07339	0.884138	1.30315	0.623	0.5987	0.386	0.1185	0.1367	1.12581	0.861197	1.47172		h	x	2.409e-08	---	-54.7	0.2745	0.81824	0.762494	0.87806	0.506538	0.45732	2.3e-05	1.29671	1.14927	1.46306	0.6207	0.5997	0.691	0.97192	0.844399	1.1187	0.4776	0.4372	0.0173	0.833
AA_DPA1_-5_33149246	33149246	R	x	0.3609	0.4309	4.77e-13	0.742999	0.976365	0.805298	0.3535	0.3886	0.296	0.902425	0.74447	1.09389	0.2811	0.3046	0.29	-0.1546	0.1461	0.856758	0.643421	1.14083	99	r	x	1.131e-12	---	-2.5	0.1421	0.770358	0.716891	0.827813	0.353755	0.385999	0.00421	0.838412	0.742714	0.946441	0.2766	0.2981	0.829	1.01676	0.874541	1.18211	0.359	0.4055	0.0142	1.215
AA_DPA1_50_33145500	33145500	Q	R	0.364	0.4346	3.42e-13	0.7411	0.976107	0.803396	0.3542	0.3933	0.216	0.885564	0.730618	1.07337	0.2812	0.3048	0.29	-0.1545	0.1461	0.856843	0.643485	1.14094	99	q	r	5.079e-13	---	-17.1	0.1812	0.766822	0.713461	0.824175	0.351986	0.385021	0.00343	0.834808	0.739337	0.942607	0.2785	0.2993	0.774	1.02221	0.879671	1.18785	0.3558	0.4046	0.00961	1.228
AA_DPA1_6_33145632	33145632	x	V	0.5147	0.4579	1.23e-08	1.25748	1.01823	1.36065	0.5059	0.4759	0.475	1.07329	0.884007	1.30311	0.623	0.5987	0.386	0.1185	0.1367	1.12581	0.861197	1.47172		v	x	2.437e-08	---	-54.8	0.2747	0.81824	0.762494	0.87806	0.506525	0.457309	2.3e-05	1.29669	1.14926	1.46303	0.6207	0.5997	0.691	0.97192	0.844399	1.1187	0.4776	0.4372	0.0173	0.833
AA_DPA1_-6_33149249	33149249	L	x	0.3609	0.4309	4.76e-13	0.742992	0.976365	0.80529	0.3535	0.3886	0.296	0.902425	0.74447	1.09389	0.2811	0.3046	0.29	-0.1546	0.1461	0.856758	0.643421	1.14083	99	l	x	1.129e-12	---	-2.5	0.1421	0.770358	0.716891	0.827813	0.353671	0.385959	0.00416	0.838185	0.742511	0.946187	0.2766	0.2981	0.829	1.01676	0.874541	1.18211	0.359	0.4055	0.0142	1.215
AA_DPA1_7_33145629	33145629	x	S	0.5148	0.458	1.22e-08	1.25749	1.01823	1.36063	0.5059	0.4759	0.474	1.07339	0.884104	1.3032	0.623	0.5987	0.386	0.1185	0.1367	1.12581	0.861197	1.47172		s	x	2.41e-08	---	-54.9	0.2749	0.81824	0.762644	0.877888	0.506528	0.45731	2.3e-05	1.29672	1.14928	1.46306	0.6206	0.5996	0.691	0.971894	0.844364	1.11868	0.4776	0.4372	0.0173	0.833
AA_DPA1_-7_33149252	33149252	S	x	0.3609	0.4309	4.76e-13	0.742992	0.976365	0.80529	0.3535	0.3886	0.296	0.902425	0.74447	1.09389	0.2811	0.3046	0.29	-0.1546	0.1461	0.856758	0.643421	1.14083	99	s	x	1.129e-12	---	-2.5	0.1421	0.770358	0.716891	0.827813	0.353775	0.386018	0.0042	0.838401	0.742718	0.94641	0.2766	0.2981	0.829	1.01676	0.874541	1.18211	0.359	0.4055	0.0142	1.215
AA_DPA1_72_33145434	33145434	I	T	0.0032	0.0026	0.723	1.13726	1.09569	2.31433	0.0144	0.0156	0.899	0.952276	0.446445	2.03123	0.0278	0.0411	0.339	-0.3563	0.3723	0.700263	0.337561	1.45268		t	i	0.6791	-++	0	0.6419	1.0933	0.716501	1.66825	NA	NA	NA	NA	NA	NA	0.0234	0.0254	0.08	0.671544	0.430007	1.04875	0.001068	0	0.967	0
AA_DPA1_73_33145431	33145431	A	L	0.0032	0.0026	0.721	1.13844	1.09648	2.31633	0.0144	0.0156	0.899	0.952276	0.446445	2.03123	0.0278	0.0411	0.339	-0.3563	0.3723	0.700263	0.337561	1.45268	99	a	l	0.6804	+--	0	0.6407	0.915029	0.59967	1.39623	NA	NA	NA	NA	NA	NA	0.0234	0.0254	0.0802	0.671716	0.430123	1.04901	0.001068	0	0.967	0
AA_DPA1_8_33145626	33145626	x	T	0.0049	0.0042	0.635	1.14919	1.08316	2.04116	0.0151	0.0203	0.412	0.741115	0.36226	1.51618	0.0279	0.0413	0.336	-0.3579	0.3723	0.699143	0.337022	1.45035		t	x	0.5318	-++	0	0.4889	1.12953	0.771045	1.65468	NA	NA	NA	NA	NA	NA	0.0235	0.0265	0.0556	0.649964	0.418131	1.01034	0.001068	0	0.967	0
AA_DPA1_-8_33149255	33149255	L	x	0.3609	0.4309	4.76e-13	0.742992	0.976365	0.80529	0.3535	0.3886	0.296	0.902425	0.74447	1.09389	0.2811	0.3046	0.29	-0.1546	0.1461	0.856758	0.643421	1.14083	99	l	x	1.129e-12	---	-2.5	0.1421	0.770358	0.716891	0.827813	0.35363	0.385949	0.00413	0.838071	0.742402	0.946068	0.2766	0.2981	0.829	1.01676	0.874541	1.18211	0.359	0.4055	0.0142	1.215
AA_DPA1_83_33145401	33145401	T	A	0.3636	0.434	3.87e-13	0.741737	0.976192	0.80404	0.3542	0.3933	0.216	0.885564	0.730618	1.07337	0.2812	0.3048	0.29	-0.1545	0.1461	0.856843	0.643485	1.14094		a	t	5.604e-13	+++	-18.3	0.1843	1.30317	1.21272	1.40036	0.352531	0.385632	0.00343	0.83505	0.739695	0.942697	0.2784	0.2992	0.774	1.02225	0.879729	1.18787	0.3558	0.4046	0.00961	1.228
AA_DPA1_9_33145623	33145623	x	Y	0.0049	0.0042	0.652	1.14109	1.07856	2.02378	0.0151	0.0203	0.412	0.741115	0.36226	1.51618	0.0279	0.0413	0.337	-0.3578	0.3723	0.699213	0.337055	1.4505	99	x	y	0.5229	+--	0	0.4985	0.883115	0.603074	1.2932	NA	NA	NA	NA	NA	NA	0.0236	0.0265	0.0557	0.650064	0.41819	1.0105	0.001068	0	0.967	0
AA_DPA1_-9_33149258	33149258	L	x	0.3609	0.4309	4.76e-13	0.742985	0.976364	0.805282	0.3535	0.3886	0.296	0.902425	0.74447	1.09389	0.2811	0.3046	0.29	-0.1546	0.1461	0.856758	0.643421	1.14083	99	l	x	1.127e-12	---	-2.5	0.1421	0.770281	0.716819	0.82773	0.353677	0.385968	0.00417	0.838229	0.742549	0.946237	0.2766	0.2981	0.829	1.01676	0.874541	1.18211	0.359	0.4055	0.0142	1.215
AA_DPA1_96_33145022	33145022	A	P	0.0079	0.01	0.505	0.861862	0.937142	1.33382	0.0144	0.0156	0.899	0.952276	0.446445	2.03123	0.028	0.0411	0.349	-0.3483	0.3722	0.705887	0.340339	1.46406	99	a	p	0.3173	---	0	0.845	0.842485	0.602093	1.17886	NA	NA	NA	NA	NA	NA	0.0234	0.0254	0.0801	0.671672	0.430096	1.04894	0.001068	0	0.967	0
AA_DPB1_-1_33151882	33151882	x	G	0.0229	0.0218	0.44	1.11974	1.033	1.49204	0.0551	0.0627	0.919	0.978915	0.649039	1.47645	0.0245	0.0522	0.00856	-1.0163	0.3866	0.361932	0.169647	0.77216		g	x	0.8176	-++	46.4	0.02394	1.02675	0.820032	1.28558	NA	NA	NA	NA	NA	NA	0.0329	0.0383	0.0258	0.630304	0.420055	0.94579	0.007479	0.009727	0.327	1.516
AA_DPB1_1_33151885	33151885	x	R	0.0229	0.0218	0.44	1.11974	1.033	1.49204	0.0551	0.0627	0.919	0.978915	0.649039	1.47645	0.0245	0.0522	0.00856	-1.0163	0.3866	0.361932	0.169647	0.77216		r	x	0.8176	-++	46.4	0.02394	1.02675	0.820032	1.28558	NA	NA	NA	NA	NA	NA	0.0329	0.0383	0.0258	0.630304	0.420055	0.94579	0.007479	0.009727	0.327	1.516
AA_DPB1_-10_33151855	33151855	x	M	0.0229	0.0218	0.44	1.1197	1.03299	1.49198	0.0551	0.0627	0.919	0.978915	0.649039	1.47645	0.0245	0.0522	0.00856	-1.0163	0.3866	0.361932	0.169647	0.77216		m	x	0.8175	-++	46.4	0.02395	1.02685	0.820114	1.28571	NA	NA	NA	NA	NA	NA	0.0329	0.0383	0.0258	0.630304	0.420055	0.94579	0.007479	0.009727	0.327	1.516
AA_DPB1_-11_33151852	33151852	x	L	0.0229	0.0218	0.44	1.1197	1.03299	1.49198	0.0551	0.0627	0.919	0.978915	0.649039	1.47645	0.0245	0.0522	0.00856	-1.0163	0.3866	0.361932	0.169647	0.77216		l	x	0.8175	-++	46.4	0.02395	1.02685	0.820114	1.28571	NA	NA	NA	NA	NA	NA	0.0329	0.0383	0.0258	0.630304	0.420055	0.94579	0.007479	0.009727	0.327	1.516
AA_DPB1_11_33156445	33156445	L	G	0.187	0.1672	0.00181	1.17943	1.01726	1.30828	0.2329	0.2143	0.335	1.12266	0.887364	1.42035	0.2337	0.2281	0.715	0.05818	0.15953	1.05991	0.775305	1.44898		g	l	0.001329	---	0	0.7816	0.861828	0.787062	0.943695	0.174214	0.19352	0.0956	0.879166	0.755025	1.02372	0.2185	0.1764	0.114	1.15373	0.966295	1.37753	0.1859	0.1931	0.561	1.06
AA_DPB1_-12_33151849	33151849	x	L	0.0229	0.0218	0.44	1.1197	1.03299	1.49198	0.0551	0.0627	0.919	0.978915	0.649039	1.47645	0.0245	0.0522	0.00856	-1.0163	0.3866	0.361932	0.169647	0.77216		l	x	0.8175	-++	46.4	0.02395	1.02685	0.820114	1.28571	NA	NA	NA	NA	NA	NA	0.0329	0.0383	0.0258	0.630304	0.420055	0.94579	0.007479	0.009727	0.327	1.516
AA_DPB1_-13_33151846	33151846	x	A	0.0229	0.0218	0.44	1.1197	1.03299	1.49198	0.0551	0.0627	0.919	0.978915	0.649039	1.47645	0.0245	0.0522	0.00856	-1.0163	0.3866	0.361932	0.169647	0.77216		a	x	0.8175	-++	46.4	0.02395	1.02685	0.820114	1.28571	NA	NA	NA	NA	NA	NA	0.0329	0.0383	0.0258	0.630304	0.420055	0.94579	0.007479	0.009727	0.327	1.516
AA_DPB1_-14_33151843	33151843	x	T	0.0229	0.0218	0.44	1.1197	1.03299	1.49198	0.0551	0.0627	0.919	0.978915	0.649039	1.47645	0.0245	0.0522	0.00856	-1.0163	0.3866	0.361932	0.169647	0.77216		t	x	0.8175	-++	46.4	0.02395	1.02685	0.820114	1.28571	NA	NA	NA	NA	NA	NA	0.0329	0.0383	0.0258	0.630304	0.420055	0.94579	0.007479	0.009727	0.327	1.516
AA_DPB1_-15_33151840	33151840	x	L	0.0229	0.0218	0.44	1.1197	1.03299	1.49198	0.0551	0.0627	0.919	0.978915	0.649039	1.47645	0.0245	0.0522	0.00856	-1.0163	0.3866	0.361932	0.169647	0.77216		l	x	0.8175	-++	46.4	0.02395	1.02685	0.820114	1.28571	NA	NA	NA	NA	NA	NA	0.0329	0.0383	0.0258	0.630304	0.420055	0.94579	0.007479	0.009727	0.327	1.516
AA_DPB1_-16_33151837	33151837	x	A	0.0229	0.0218	0.44	1.1197	1.03299	1.49198	0.0551	0.0627	0.919	0.978915	0.649039	1.47645	0.0245	0.0522	0.00856	-1.0163	0.3866	0.361932	0.169647	0.77216		a	x	0.8175	-++	46.4	0.02395	1.02685	0.820114	1.28571	NA	NA	NA	NA	NA	NA	0.0329	0.0383	0.0258	0.630304	0.420055	0.94579	0.007479	0.009727	0.327	1.516
AA_DPB1_-17_33151834	33151834	x	V	0.0229	0.0218	0.44	1.1197	1.03299	1.49198	0.0551	0.0627	0.919	0.978915	0.649039	1.47645	0.0245	0.0522	0.00856	-1.0163	0.3866	0.361932	0.169647	0.77216		v	x	0.8175	-++	46.4	0.02395	1.02685	0.820114	1.28571	NA	NA	NA	NA	NA	NA	0.0329	0.0383	0.0258	0.630304	0.420055	0.94579	0.007479	0.009727	0.327	1.516
AA_DPB1_170_33160936_I	33160936	P	A	0.5658	0.5095	8.93e-09	1.26002	1.01838	1.36332	0.5479	0.5036	0.167	1.14262	0.945858	1.3803	0.6248	0.6099	0.546	0.08425	0.13944	1.0879	0.827743	1.42983		a	p	6.717e-09	---	0	0.4235	0.812288	0.757097	0.871503	0.605306	0.581286	0.0254	1.14637	1.01665	1.29264	0.6424	0.604	0.378	1.0665	0.924284	1.2306	0.3942	0.4421	0.00828	1.229
AA_DPB1_170_33160936_T	33160936	P	A	0.4322	0.4889	6.76e-09	0.792161	0.981814	0.857085	0.4449	0.4853	0.211	0.886557	0.734165	1.07058	0.3584	0.3571	0.942	0.01025	0.14176	1.0103	0.765214	1.33389		a	p	1.872e-08	++-	-12.5	0.169	1.2236	1.14046	1.3128	0.390457	0.414916	0.0195	0.866449	0.76802	0.977492	0.3313	0.3778	0.477	0.948836	0.82102	1.09655	0.3942	0.4412	0.00943	1.225
AA_DPB1_178_33160960_L	33160960	A	P	0.0728	0.0806	0.105	0.883786	0.981732	1.02603	0.0675	0.0816	0.923	0.981641	0.672989	1.43185	0.0338	0.0523	0.142	-0.4916	0.3349	0.611647	0.317269	1.17916	99	a	p	0.0696	---	0	0.4714	0.881879	0.769874	1.01018	0.0901172	0.0898472	0.969	0.996002	0.812952	1.22027	0.0519	0.05	0.98	0.995634	0.711752	1.39273	0.0641	0.09889	0.00054	1.685
AA_DPB1_178_33160960_M	33160960	P	A	0.0708	0.079	0.0848	0.876288	0.980358	1.01832	0.0599	0.0699	0.882	1.03067	0.692468	1.53405	0.0171	0.0186	0.79	0.1359	0.5102	1.14557	0.421434	3.11395		a	p	0.1318	+--	0	0.6734	1.11293	0.968352	1.2791	0.0858999	0.0860805	0.843	0.979562	0.797992	1.20245	0.0255	0.0319	0.65	1.1005	0.727874	1.66388	0.0641	0.09796	0.000708	1.667
AA_DPB1_-18_33151831	33151831	x	T	0.0229	0.0218	0.44	1.11969	1.03298	1.49196	0.0551	0.0627	0.919	0.978915	0.649039	1.47645	0.0245	0.0522	0.00856	-1.0163	0.3866	0.361932	0.169647	0.77216		t	x	0.8174	-++	46.4	0.02395	1.02685	0.820114	1.28571	NA	NA	NA	NA	NA	NA	0.0329	0.0383	0.0258	0.630304	0.420055	0.94579	0.007479	0.009727	0.327	1.516
AA_DPB1_187_33161534	33161534	x	K	0.0218	0.0205	0.452	1.11497	1.03132	1.48024	0.0563	0.0648	0.9	0.974121	0.646632	1.46747	0.0236	0.0497	0.0141	-0.9244	0.3767	0.396769	0.18962	0.830217		k	x	0.8287	-++	39	0.03768	1.0248	0.820563	1.27988	0.0102031	0.00816674	0.142	1.83114	0.828938	4.04503	0.0406	0.0405	0.0261	0.637158	0.42834	0.947776	0.00641	0.007874	0.508	1.358
AA_DPB1_188_33161537	33161537	x	A	0.0217	0.0202	0.387	1.13343	1.03621	1.50564	0.0563	0.0648	0.9	0.974131	0.646639	1.46748	0.0236	0.0497	0.0141	-0.9244	0.3767	0.396769	0.18962	0.830217		a	x	0.8964	-++	40.9	0.03391	1.01491	0.812483	1.26777	0.0102241	0.00820998	0.144	1.82479	0.826312	4.0298	0.0407	0.0405	0.0263	0.637598	0.428662	0.948372	0.00641	0.007874	0.508	1.358
AA_DPB1_189_33161540	33161540	x	Q	0.0217	0.0202	0.386	1.13392	1.03633	1.50622	0.0563	0.0648	0.9	0.974082	0.646606	1.46741	0.0236	0.0497	0.0141	-0.9244	0.3767	0.396769	0.18962	0.830217		q	x	0.8983	-++	41	0.03381	1.01461	0.81224	1.26739	0.0101741	0.00819643	0.148	1.81241	0.820296	4.00445	0.0407	0.0405	0.0263	0.637539	0.428619	0.948292	0.00641	0.007874	0.508	1.358
AA_DPB1_-19_33151828	33151828	x	R	0.0229	0.0218	0.441	1.11942	1.03291	1.49163	0.0551	0.0627	0.919	0.978915	0.649039	1.47645	0.0245	0.0522	0.00856	-1.0163	0.3866	0.361932	0.169647	0.77216		r	x	0.8163	-++	46.4	0.02399	1.02696	0.820196	1.28584	NA	NA	NA	NA	NA	NA	0.0329	0.0383	0.0258	0.630304	0.420055	0.94579	0.007479	0.009727	0.327	1.516
AA_DPB1_190_33161543	33161543	x	S	0.0217	0.0202	0.386	1.13392	1.03633	1.50622	0.0563	0.0648	0.9	0.974082	0.646606	1.46741	0.0236	0.0497	0.0141	-0.9244	0.3767	0.396769	0.18962	0.830217		s	x	0.8983	-++	41	0.03381	1.01461	0.81224	1.26739	0.0101189	0.00814393	0.149	1.81231	0.820062	4.00515	0.0408	0.0406	0.0263	0.63746	0.428548	0.948213	0.00641	0.007874	0.508	1.358
AA_DPB1_191_33161546	33161546	x	D	0.0217	0.0202	0.386	1.13392	1.03633	1.50622	0.0563	0.0648	0.9	0.974082	0.646606	1.46741	0.0236	0.0497	0.0141	-0.9244	0.3767	0.396769	0.18962	0.830217		d	x	0.8983	-++	41	0.03381	1.01461	0.81224	1.26739	0.0102338	0.00825237	0.145	1.82103	0.824506	4.02199	0.0407	0.0405	0.0264	0.6377	0.428733	0.94852	0.00641	0.007874	0.508	1.358
AA_DPB1_192_33161549	33161549	x	S	0.0217	0.0202	0.386	1.13392	1.03633	1.50622	0.0563	0.0648	0.9	0.974082	0.646606	1.46741	0.0236	0.0497	0.0141	-0.9244	0.3767	0.396769	0.18962	0.830217		s	x	0.8983	-++	41	0.03381	1.01461	0.81224	1.26739	0.0101581	0.00816954	0.147	1.81768	0.82272	4.01588	0.0407	0.0405	0.0263	0.637598	0.428662	0.948372	0.00641	0.007874	0.508	1.358
AA_DPB1_193_33161552	33161552	x	A	0.0217	0.0202	0.386	1.13392	1.03633	1.50622	0.0563	0.0648	0.9	0.974082	0.646606	1.46741	0.0236	0.0497	0.0141	-0.9244	0.3767	0.396769	0.18962	0.830217		a	x	0.8983	-++	41	0.03381	1.01461	0.81224	1.26739	0.010194	0.00821794	0.149	1.81179	0.820105	4.00265	0.0407	0.0405	0.0263	0.637664	0.428708	0.948465	0.00641	0.007874	0.508	1.358
AA_DPB1_194_33161555_R	33161555	A	P	0.0219	0.0205	0.402	1.12818	1.03462	1.49602	0.0564	0.0655	0.936	0.983429	0.654092	1.47859	0.0253	0.0535	0.00812	-0.9632	0.3639	0.38167	0.187038	0.778835	99	a	p	0.8357	+--	47.9	0.02159	0.976969	0.783491	1.21823	NA	NA	NA	NA	NA	NA	0.0645	0.0469	0.0184	0.668766	0.478572	0.934546	NA	NA	NA	NA
AA_DPB1_194_33161555_x	33161555	P	A	0.0217	0.0202	0.386	1.13392	1.03633	1.50622	0.0563	0.0648	0.9	0.974121	0.646645	1.46744	0.0236	0.0495	0.0143	-0.9229	0.3769	0.397365	0.18983	0.831789		a	p	0.8999	-++	40.7	0.03424	1.0144	0.812077	1.26714	NA	NA	NA	NA	NA	NA	0.0407	0.0406	0.0264	0.637796	0.428789	0.94868	NA	NA	NA	NA
AA_DPB1_195_33161558	33161558	x	S	0.0217	0.0202	0.386	1.13392	1.03633	1.50622	0.0563	0.0648	0.9	0.974101	0.646632	1.46741	0.0236	0.0495	0.0143	-0.9229	0.3769	0.397365	0.18983	0.831789		s	x	0.8999	-++	40.7	0.03424	1.0144	0.812077	1.26714	0.0102156	0.00820353	0.144	1.82523	0.826455	4.03104	0.0409	0.0408	0.0252	0.635332	0.427082	0.945129	0.00641	0.007874	0.508	1.358
AA_DPB1_196_33161561	33161561	x	K	0.0217	0.0202	0.386	1.13392	1.03633	1.50622	0.0563	0.0648	0.9	0.974169	0.646677	1.46751	0.0236	0.0495	0.0143	-0.9229	0.3769	0.397365	0.18983	0.831789		k	x	0.9	-++	40.7	0.03424	1.0144	0.812077	1.26714	0.0101854	0.00819492	0.146	1.8189	0.823371	4.01809	0.0408	0.0408	0.0245	0.6339	0.426124	0.942987	0.00641	0.007874	0.508	1.358
AA_DPB1_197_33161564	33161564	x	T	0.0217	0.0202	0.386	1.13392	1.03633	1.50622	0.0563	0.0648	0.9	0.974169	0.646677	1.46751	0.0236	0.0495	0.0143	-0.9229	0.3769	0.397365	0.18983	0.831789		t	x	0.9	-++	40.7	0.03424	1.0144	0.812077	1.26714	0.0102048	0.00821041	0.145	1.82017	0.82411	4.02013	0.0408	0.0405	0.027	0.638944	0.429633	0.95023	0.00641	0.007874	0.508	1.358
AA_DPB1_198_33161567	33161567	x	L	0.0217	0.0202	0.386	1.13392	1.03633	1.50622	0.0563	0.0648	0.901	0.974228	0.646716	1.4676	0.0236	0.0495	0.0143	-0.9229	0.3769	0.397365	0.18983	0.831789		l	x	0.9002	-++	40.7	0.03424	1.0143	0.811996	1.26701	0.0102042	0.00821493	0.148	1.81429	0.821177	4.00843	0.0411	0.0407	0.0289	0.642398	0.431919	0.955445	0.00641	0.007874	0.508	1.358
AA_DPB1_199_33161570	33161570	x	T	0.0217	0.0202	0.386	1.13392	1.03633	1.50622	0.0563	0.0648	0.901	0.974228	0.646716	1.4676	0.0236	0.0495	0.0143	-0.9229	0.3769	0.397365	0.18983	0.831789		t	x	0.9002	-++	40.7	0.03424	1.0143	0.811996	1.26701	0.0102025	0.0082201	0.147	1.81492	0.821594	4.0092	0.041	0.0405	0.0294	0.643353	0.432589	0.956805	0.00641	0.007874	0.508	1.358
AA_DPB1_-2_33151879	33151879	x	Q	0.0229	0.0218	0.44	1.11968	1.03298	1.49195	0.0551	0.0627	0.919	0.978915	0.649039	1.47645	0.0245	0.0522	0.00856	-1.0163	0.3866	0.361932	0.169647	0.77216		q	x	0.8174	-++	46.4	0.02395	1.02685	0.820114	1.28571	NA	NA	NA	NA	NA	NA	0.0329	0.0383	0.0258	0.630304	0.420055	0.94579	0.007479	0.009727	0.327	1.516
AA_DPB1_2_33151888	33151888	x	A	0.0229	0.0218	0.44	1.11972	1.03299	1.49201	0.0551	0.0627	0.919	0.978915	0.649039	1.47645	0.0245	0.0522	0.00856	-1.0163	0.3866	0.361932	0.169647	0.77216		a	x	0.8175	-++	46.4	0.02395	1.02685	0.820114	1.28571	NA	NA	NA	NA	NA	NA	0.0329	0.0383	0.0258	0.630304	0.420055	0.94579	0.007479	0.009727	0.327	1.516
AA_DPB1_-20_33151825	33151825	x	P	0.0229	0.0218	0.44	1.11974	1.033	1.49204	0.0551	0.0627	0.919	0.978915	0.649039	1.47645	0.0245	0.0522	0.00856	-1.0163	0.3866	0.361932	0.169647	0.77216		p	x	0.8176	-++	46.4	0.02394	1.02675	0.820032	1.28558	NA	NA	NA	NA	NA	NA	0.0329	0.0383	0.0258	0.630304	0.420055	0.94579	0.007479	0.009727	0.327	1.516
AA_DPB1_200_33161573	33161573	x	G	0.0217	0.0202	0.386	1.13392	1.03633	1.50622	0.0563	0.0648	0.9	0.97416	0.646671	1.4675	0.0236	0.0495	0.0143	-0.9229	0.3769	0.397365	0.18983	0.831789		g	x	0.9	-++	40.7	0.03424	1.0144	0.812077	1.26714	0.0102093	0.00820417	0.144	1.82493	0.826304	4.03045	0.041	0.0405	0.0292	0.643016	0.43237	0.956286	0.00641	0.007874	0.508	1.358
AA_DPB1_201_33161576	33161576	x	A	0.0217	0.0202	0.386	1.13392	1.03633	1.50622	0.0563	0.0648	0.9	0.97415	0.646664	1.46748	0.0236	0.0495	0.0143	-0.9229	0.3769	0.397365	0.18983	0.831789		a	x	0.9	-++	40.7	0.03424	1.0144	0.812077	1.26714	0.0101854	0.00820374	0.149	1.81242	0.820284	4.00453	0.0411	0.0406	0.03	0.644449	0.433348	0.958385	0.00641	0.007874	0.508	1.358
AA_DPB1_202_33161579	33161579	x	G	0.0217	0.0202	0.386	1.13392	1.03633	1.50622	0.0563	0.0648	0.898	0.973595	0.646296	1.46665	0.0236	0.0495	0.0143	-0.9229	0.3769	0.397365	0.18983	0.831789		g	x	0.8988	-++	40.7	0.03424	1.0145	0.812158	1.26726	0.0102207	0.00819256	0.142	1.82962	0.828517	4.04034	0.0411	0.0405	0.0304	0.645127	0.433815	0.959368	0.00641	0.007874	0.508	1.358
AA_DPB1_203_33161582	33161582	x	G	0.0217	0.0202	0.386	1.13392	1.03633	1.50622	0.0564	0.0649	0.901	0.974257	0.64671	1.4677	0.0236	0.0495	0.0143	-0.9229	0.3769	0.397365	0.18983	0.831789		g	x	0.9002	-++	40.7	0.03424	1.0143	0.811996	1.26701	0.0101695	0.00818115	0.147	1.81699	0.822452	4.01416	0.041	0.0405	0.0291	0.64275	0.432181	0.955913	0.00641	0.007874	0.508	1.358
AA_DPB1_204_33161585	33161585	x	F	0.0217	0.0202	0.386	1.13392	1.03633	1.50622	0.0563	0.0648	0.901	0.974238	0.646659	1.46776	0.0237	0.0495	0.0146	-0.9206	0.377	0.39828	0.19023	0.833868		f	x	0.902	-++	40.4	0.0348	1.0141	0.811834	1.26676	0.0102053	0.00821321	0.147	1.81655	0.822336	4.01277	0.041	0.0406	0.0292	0.642907	0.432282	0.956157	0.00641	0.007874	0.508	1.358
AA_DPB1_205_33161588_M	33161588	P	A	0.3983	0.3606	0.000169	1.16735	1.01255	1.26536	0.3657	0.3408	0.419	1.0886	0.886062	1.33743	0.4074	0.4197	0.656	-0.05914	0.13281	0.942575	0.72655	1.22283		a	p	0.0004222	--+	-55.4	0.276	0.878359	0.817235	0.944054	0.431307	0.388599	0.000423	1.23937	1.09989	1.39654	0.4349	0.4561	0.385	0.940611	0.819276	1.07992	0.4241	0.3673	0.00124	0.779
AA_DPB1_205_33161588_V	33161588	A	P	0.42	0.3808	8.27e-05	1.17276	1.01272	1.2696	0.422	0.4056	0.472	1.07568	0.881796	1.31219	0.4311	0.4691	0.175	-0.1778	0.1312	0.83711	0.647296	1.08259	99	a	p	0.0006792	++-	36.6	0.04271	1.13066	1.05342	1.21356	0.441453	0.39679	0.000182	1.25678	1.11488	1.41674	0.4754	0.4966	0.0983	0.889841	0.77486	1.02188	0.4306	0.3752	0.00201	0.788
AA_DPB1_205_33161588_x	33161588	P	A	0.0217	0.0202	0.386	1.13392	1.03633	1.50622	0.0563	0.0648	0.901	0.974228	0.646716	1.4676	0.0237	0.0495	0.0146	-0.9206	0.377	0.39828	0.19023	0.833868		a	p	0.9019	-++	40.4	0.0348	1.0141	0.811834	1.26676	0.0101075	0.0081562	0.152	1.80281	0.815517	3.98537	0.0417	0.0406	0.0387	0.658579	0.443218	0.978584	0.00641	0.007874	0.508	1.358
AA_DPB1_206_33161591	33161591	x	L	0.0217	0.0202	0.386	1.13392	1.03633	1.50622	0.0563	0.0648	0.901	0.974228	0.646716	1.4676	0.0237	0.0495	0.0146	-0.9206	0.377	0.39828	0.19023	0.833868		l	x	0.9019	-++	40.4	0.0348	1.0141	0.811834	1.26676	0.010099	0.00815426	0.154	1.79997	0.814138	3.97952	0.0415	0.0405	0.0364	0.655047	0.440731	0.973578	0.00641	0.007874	0.508	1.358
AA_DPB1_207_33161594	33161594	x	G	0.0217	0.0202	0.386	1.13392	1.03633	1.50622	0.0563	0.0648	0.901	0.974238	0.646786	1.46747	0.0237	0.0495	0.0146	-0.9206	0.377	0.39828	0.19023	0.833868		g	x	0.9019	-++	40.4	0.0348	1.0141	0.811834	1.26676	0.0101115	0.00814867	0.151	1.80677	0.817318	3.99405	0.0411	0.0405	0.0307	0.64573	0.434225	0.960257	0.00641	0.007874	0.508	1.358
AA_DPB1_208_33161597	33161597	x	L	0.0217	0.0202	0.386	1.13392	1.03633	1.50622	0.0564	0.0648	0.901	0.974208	0.646678	1.46763	0.0237	0.0495	0.0146	-0.9206	0.377	0.39828	0.19023	0.833868		l	x	0.9019	-++	40.4	0.0348	1.0141	0.811834	1.26676	0.0101035	0.00814953	0.153	1.80252	0.815298	3.98515	0.0414	0.0405	0.0342	0.651578	0.438284	0.968672	0.00641	0.007874	0.508	1.358
AA_DPB1_209_33161600	33161600	x	I	0.0217	0.0202	0.386	1.13392	1.03633	1.50622	0.0563	0.0648	0.901	0.974228	0.646729	1.46757	0.0237	0.0495	0.0146	-0.9206	0.377	0.39828	0.19023	0.833868		i	x	0.9019	-++	40.4	0.0348	1.0141	0.811834	1.26676	0.0101041	0.00815641	0.152	1.80278	0.815542	3.9851	0.0413	0.0406	0.0326	0.648956	0.43645	0.96493	0.00641	0.007874	0.508	1.358
AA_DPB1_-21_33151822	33151822	x	A	0.0229	0.0218	0.44	1.11974	1.033	1.49204	0.0551	0.0627	0.919	0.978915	0.649039	1.47645	0.0245	0.0522	0.00856	-1.0163	0.3866	0.361932	0.169647	0.77216		a	x	0.8176	-++	46.4	0.02394	1.02675	0.820032	1.28558	NA	NA	NA	NA	NA	NA	0.0329	0.0383	0.0258	0.630304	0.420055	0.94579	0.007479	0.009727	0.327	1.516
AA_DPB1_210_33161603	33161603	x	I	0.0217	0.0202	0.386	1.13392	1.03633	1.50622	0.0563	0.0648	0.901	0.974257	0.646748	1.46761	0.0237	0.0495	0.0146	-0.9206	0.377	0.39828	0.19023	0.833868		i	x	0.902	-++	40.4	0.0348	1.0141	0.811834	1.26676	0.0101092	0.00815921	0.152	1.803	0.815582	3.98587	0.0413	0.0405	0.0337	0.650702	0.437686	0.967392	0.00641	0.007874	0.508	1.358
AA_DPB1_211_33161606	33161606	x	C	0.0217	0.0202	0.386	1.13392	1.03633	1.50622	0.0563	0.0648	0.901	0.974325	0.646793	1.46772	0.0237	0.0495	0.0146	-0.9206	0.377	0.39828	0.19023	0.833868		c	x	0.9021	-++	40.4	0.0348	1.0141	0.811834	1.26676	0.01012	0.0081648	0.152	1.80424	0.816181	3.98843	0.0411	0.0405	0.0313	0.646763	0.434939	0.961749	0.00641	0.007874	0.508	1.358
AA_DPB1_212_33161609	33161609	x	G	0.0217	0.0202	0.386	1.13392	1.03633	1.50622	0.0563	0.0648	0.901	0.974325	0.646793	1.46772	0.0237	0.0495	0.0146	-0.9206	0.377	0.39828	0.19023	0.833868		g	x	0.9021	-++	40.4	0.0348	1.0141	0.811834	1.26676	0.0101115	0.00816609	0.153	1.80026	0.814332	3.97986	0.0409	0.0405	0.0291	0.642748	0.432181	0.955907	0.00641	0.007874	0.508	1.358
AA_DPB1_213_33161612	33161612	x	V	0.0217	0.0202	0.386	1.13392	1.03633	1.50622	0.0563	0.0648	0.901	0.974345	0.646794	1.46778	0.0237	0.0495	0.0146	-0.9206	0.377	0.39828	0.19023	0.833868		v	x	0.9022	-++	40.4	0.0348	1.0141	0.811834	1.26676	0.0101086	0.00815361	0.152	1.80445	0.816278	3.98889	0.0411	0.0405	0.0313	0.64668	0.434884	0.961625	0.00641	0.007874	0.508	1.358
AA_DPB1_214_33161615	33161615	x	G	0.0217	0.0202	0.386	1.13392	1.03633	1.50622	0.0563	0.0648	0.901	0.974247	0.646742	1.4676	0.0237	0.0495	0.0146	-0.9206	0.377	0.39828	0.19023	0.833868		g	x	0.902	-++	40.4	0.0348	1.0141	0.811834	1.26676	0.0101342	0.00818158	0.153	1.80185	0.815218	3.98257	0.0413	0.0406	0.0326	0.648884	0.43641	0.964803	0.00641	0.007874	0.508	1.358
AA_DPB1_215_33161618_I	33161618	A	P	0.0236	0.0219	0.306	1.15257	1.03937	1.51274	0.0566	0.0695	0.551	0.884971	0.591915	1.32312	0.0237	0.0495	0.0146	-0.9206	0.377	0.39828	0.19023	0.833868	99	a	p	0.8257	+--	45.3	0.02578	0.97609	0.786939	1.21071	0.0101024	0.00814824	0.152	1.80379	0.815939	3.98763	0.0411	0.0416	0.0217	0.629703	0.424324	0.934489	NA	NA	NA	NA
AA_DPB1_215_33161618_x	33161618	P	A	0.0217	0.0202	0.386	1.13392	1.03633	1.50622	0.0563	0.0648	0.901	0.974374	0.646826	1.46779	0.0237	0.0495	0.0146	-0.9206	0.377	0.39828	0.19023	0.833868		a	p	0.9022	-++	40.4	0.03481	1.014	0.811752	1.26663	0.0101024	0.00814824	0.152	1.80379	0.815939	3.98763	0.0412	0.0405	0.032	0.647907	0.435735	0.963392	NA	NA	NA	NA
AA_DPB1_216_33161621	33161621	x	F	0.0217	0.0202	0.386	1.13392	1.03633	1.50622	0.0563	0.0647	0.903	0.974813	0.647104	1.46848	0.0237	0.0495	0.0146	-0.9206	0.377	0.39828	0.19023	0.833868		f	x	0.9031	-++	40.4	0.03481	1.0139	0.811671	1.2665	0.010099	0.00814092	0.151	1.80546	0.816731	3.99112	0.0411	0.0405	0.0307	0.645718	0.43422	0.96023	0.00641	0.007874	0.508	1.358
AA_DPB1_217_33161624	33161624	x	M	0.0217	0.0202	0.386	1.13392	1.03633	1.50622	0.0563	0.0647	0.903	0.974813	0.647104	1.46848	0.0237	0.0495	0.0146	-0.9206	0.377	0.39828	0.19023	0.833868		m	x	0.9031	-++	40.4	0.03481	1.0139	0.811671	1.2665	0.0101234	0.0081648	0.151	1.80572	0.817034	3.9908	0.041	0.0405	0.0295	0.643545	0.432722	0.95708	0.00641	0.007874	0.508	1.358
AA_DPB1_218_33161627	33161627	x	H	0.0217	0.0202	0.386	1.13392	1.03633	1.50622	0.0563	0.0647	0.903	0.974813	0.647104	1.46848	0.0237	0.0495	0.0146	-0.9206	0.377	0.39828	0.19023	0.833868		h	x	0.9031	-++	40.4	0.03481	1.0139	0.811671	1.2665	0.0101149	0.00816394	0.153	1.80194	0.81524	3.98288	0.0414	0.0405	0.0351	0.653023	0.439312	0.970696	0.00641	0.007874	0.508	1.358
AA_DPB1_219_33161630	33161630	x	R	0.0217	0.0202	0.386	1.13392	1.03633	1.50622	0.0563	0.0647	0.903	0.974813	0.647104	1.46848	0.0237	0.0495	0.0146	-0.9206	0.377	0.39828	0.19023	0.833868		r	x	0.9031	-++	40.4	0.03481	1.0139	0.811671	1.2665	0.0101416	0.00819126	0.152	1.80221	0.81547	3.98291	0.0409	0.0406	0.0284	0.641506	0.431321	0.954116	0.00641	0.007874	0.508	1.358
AA_DPB1_-22_33151819	33151819	x	A	0.0229	0.0218	0.44	1.11974	1.033	1.49204	0.0551	0.0627	0.919	0.978915	0.649039	1.47645	0.0245	0.0522	0.00856	-1.0163	0.3866	0.361932	0.169647	0.77216		a	x	0.8176	-++	46.4	0.02394	1.02675	0.820032	1.28558	NA	NA	NA	NA	NA	NA	0.0329	0.0383	0.0258	0.630304	0.420055	0.94579	0.007479	0.009727	0.327	1.516
AA_DPB1_220_33161633	33161633	x	R	0.0217	0.0202	0.386	1.13392	1.03633	1.50622	0.0563	0.0647	0.903	0.974813	0.647104	1.46848	0.0237	0.0495	0.0146	-0.9206	0.377	0.39828	0.19023	0.833868		r	x	0.9031	-++	40.4	0.03481	1.0139	0.811671	1.2665	0.0101143	0.00814996	0.15	1.80774	0.817887	3.99559	0.0413	0.0405	0.0336	0.650569	0.437594	0.967199	0.00641	0.007874	0.508	1.358
AA_DPB1_221_33161636	33161636	x	S	0.0217	0.0202	0.386	1.13392	1.03633	1.50622	0.0563	0.0647	0.903	0.974813	0.647104	1.46848	0.0237	0.0495	0.0146	-0.9206	0.377	0.39828	0.19023	0.833868		s	x	0.9031	-++	40.4	0.03481	1.0139	0.811671	1.2665	0.0101411	0.00816545	0.149	1.81157	0.819903	4.00266	0.0413	0.0406	0.0318	0.64754	0.435468	0.962891	0.00641	0.007874	0.508	1.358
AA_DPB1_222_33161639	33161639	x	K	0.0217	0.0202	0.386	1.13392	1.03633	1.50622	0.0563	0.0647	0.903	0.974813	0.647104	1.46848	0.0237	0.0495	0.0146	-0.9206	0.377	0.39828	0.19023	0.833868		k	x	0.9031	-++	40.4	0.03481	1.0139	0.811671	1.2665	0.0101274	0.00816781	0.151	1.80541	0.816841	3.9904	0.0411	0.0406	0.0294	0.643224	0.432476	0.956672	0.00641	0.007874	0.508	1.358
AA_DPB1_223_33161642	33161642	x	K	0.0217	0.0202	0.386	1.13392	1.03633	1.50622	0.0563	0.0647	0.903	0.974813	0.647104	1.46848	0.0237	0.0495	0.0146	-0.9206	0.377	0.39828	0.19023	0.833868		k	x	0.9031	-++	40.4	0.03481	1.0139	0.811671	1.2665	0.0101513	0.00821041	0.154	1.79813	0.813675	3.97365	0.0412	0.0406	0.0317	0.6473	0.435302	0.962544	0.00641	0.007874	0.508	1.358
AA_DPB1_224_33161974	33161974	x	V	0.0217	0.0202	0.385	1.1341	1.03638	1.50646	0.0563	0.0647	0.903	0.974842	0.647124	1.46852	0.0237	0.0495	0.0146	-0.9206	0.377	0.39828	0.19023	0.833868		v	x	0.9039	-++	40.5	0.03477	1.01379	0.81159	1.26638	0.00956485	0.00785843	0.198	1.70559	0.767219	3.79166	0.0408	0.0405	0.0271	0.639161	0.429774	0.950562	0.00641	0.007874	0.508	1.358
AA_DPB1_225_33161977	33161977	x	Q	0.0217	0.0202	0.386	1.13395	1.03634	1.50627	0.0563	0.0647	0.903	0.974842	0.647124	1.46852	0.0237	0.0495	0.0146	-0.9206	0.377	0.39828	0.19023	0.833868		q	x	0.9033	-++	40.4	0.0348	1.0139	0.811671	1.2665	0.00953811	0.0078466	0.199	1.7023	0.765571	3.78519	0.0408	0.0405	0.0272	0.639347	0.429901	0.950835	0.00641	0.007874	0.508	1.358
AA_DPB1_226_33161980	33161980	x	R	0.0217	0.0202	0.385	1.13401	1.03635	1.50634	0.0563	0.0647	0.903	0.974842	0.647124	1.46852	0.0237	0.0495	0.0146	-0.9206	0.377	0.39828	0.19023	0.833868		r	x	0.9036	-++	40.4	0.03479	1.0139	0.811671	1.2665	0.00953072	0.00783133	0.199	1.70246	0.765697	3.78528	0.0408	0.0405	0.027	0.638971	0.429644	0.950282	0.00641	0.007874	0.508	1.358
AA_DPB1_227_33161983	33161983	x	G	0.0217	0.0202	0.385	1.13402	1.03635	1.50636	0.0563	0.0647	0.903	0.974842	0.647124	1.46852	0.0237	0.0495	0.0146	-0.9206	0.377	0.39828	0.19023	0.833868		g	x	0.9036	-++	40.4	0.03479	1.0139	0.811671	1.2665	0.00952901	0.00783972	0.201	1.69948	0.764295	3.77895	0.0409	0.0407	0.0263	0.63762	0.428739	0.948268	0.00641	0.007874	0.508	1.358
AA_DPB1_228_33161986	33161986	x	S	0.0217	0.0202	0.384	1.13455	1.03649	1.50704	0.0563	0.0647	0.904	0.975076	0.647279	1.46888	0.0237	0.0495	0.0146	-0.9206	0.377	0.39828	0.19023	0.833868		s	x	0.9062	-++	40.5	0.03468	1.01349	0.811347	1.266	0.00955063	0.00784746	0.199	1.70304	0.766001	3.78635	0.0408	0.0405	0.0272	0.639419	0.429959	0.950919	0.00641	0.007874	0.508	1.358
AA_DPB1_229_33161989	33161989	x	A	0.0215	0.0201	0.406	1.1278	1.03471	1.49774	0.0561	0.0641	0.906	0.975642	0.646602	1.47212	0.0236	0.0498	0.0136	-0.9286	0.3764	0.395106	0.188937	0.826252		a	x	0.876	-++	40.9	0.03394	1.01786	0.814683	1.2717	0.00951763	0.00781325	0.198	1.70478	0.76698	3.78926	0.0404	0.0401	0.0264	0.637971	0.428989	0.94876	0.00641	0.007874	0.508	1.358
AA_DPB1_-23_33151816	33151816	x	S	0.0229	0.0218	0.44	1.11974	1.033	1.49204	0.0551	0.0627	0.919	0.978915	0.649039	1.47645	0.0245	0.0522	0.00856	-1.0163	0.3866	0.361932	0.169647	0.77216		s	x	0.8176	-++	46.4	0.02394	1.02675	0.820032	1.28558	NA	NA	NA	NA	NA	NA	0.0329	0.0383	0.0258	0.630304	0.420055	0.94579	0.007479	0.009727	0.327	1.516
AA_DPB1_-24_33151813	33151813	x	V	0.0229	0.0218	0.44	1.11974	1.033	1.49204	0.0551	0.0627	0.919	0.978915	0.649039	1.47645	0.0245	0.0522	0.00856	-1.0163	0.3866	0.361932	0.169647	0.77216		v	x	0.8176	-++	46.4	0.02394	1.02675	0.820032	1.28558	NA	NA	NA	NA	NA	NA	0.0329	0.0383	0.0258	0.630304	0.420055	0.94579	0.007479	0.009727	0.327	1.516
AA_DPB1_-25_33151810	33151810	x	Q	0.0229	0.0218	0.44	1.11974	1.033	1.49204	0.0551	0.0627	0.919	0.978915	0.649039	1.47645	0.0245	0.0522	0.00856	-1.0163	0.3866	0.361932	0.169647	0.77216		q	x	0.8176	-++	46.4	0.02394	1.02675	0.820032	1.28558	NA	NA	NA	NA	NA	NA	0.0329	0.0383	0.0258	0.630304	0.420055	0.94579	0.007479	0.009727	0.327	1.516
AA_DPB1_-26_33151807	33151807	x	L	0.0229	0.0218	0.44	1.11974	1.033	1.49204	0.0551	0.0627	0.919	0.978915	0.649039	1.47645	0.0245	0.0522	0.00856	-1.0163	0.3866	0.361932	0.169647	0.77216		l	x	0.8176	-++	46.4	0.02394	1.02675	0.820032	1.28558	NA	NA	NA	NA	NA	NA	0.0329	0.0383	0.0258	0.630304	0.420055	0.94579	0.007479	0.009727	0.327	1.516
AA_DPB1_-27_33151804	33151804	x	V	0.0229	0.0218	0.44	1.11976	1.033	1.49205	0.0551	0.0627	0.919	0.978915	0.649039	1.47645	0.0245	0.0522	0.00856	-1.0163	0.3866	0.361932	0.169647	0.77216		v	x	0.8177	-++	46.4	0.02394	1.02675	0.820032	1.28558	NA	NA	NA	NA	NA	NA	0.0329	0.0383	0.0258	0.630304	0.420055	0.94579	0.007479	0.009727	0.327	1.516
AA_DPB1_-28_33151801	33151801	x	M	0.0229	0.0218	0.44	1.1198	1.03301	1.49211	0.0551	0.0627	0.919	0.978915	0.649039	1.47645	0.0245	0.0522	0.00856	-1.0163	0.3866	0.361932	0.169647	0.77216		m	x	0.8178	-++	46.4	0.02393	1.02675	0.820032	1.28558	NA	NA	NA	NA	NA	NA	0.0329	0.0383	0.0258	0.630304	0.420055	0.94579	0.007479	0.009727	0.327	1.516
AA_DPB1_-29_33151798	33151798	x	M	0.0228	0.0218	0.441	1.11935	1.0329	1.49154	0.0551	0.0627	0.919	0.978925	0.649007	1.47656	0.0245	0.0522	0.00856	-1.0163	0.3866	0.361932	0.169647	0.77216		m	x	0.8161	-++	46.4	0.024	1.02706	0.820278	1.28597	NA	NA	NA	NA	NA	NA	0.0333	0.0389	0.0228	0.624397	0.416329	0.936452	0.007479	0.009727	0.327	1.516
AA_DPB1_-3_33151876	33151876	x	V	0.0229	0.0218	0.44	1.11968	1.03298	1.49195	0.0551	0.0627	0.919	0.978915	0.649039	1.47645	0.0245	0.0522	0.00856	-1.0163	0.3866	0.361932	0.169647	0.77216		v	x	0.8174	-++	46.4	0.02395	1.02685	0.820114	1.28571	NA	NA	NA	NA	NA	NA	0.0329	0.0383	0.0258	0.630304	0.420055	0.94579	0.007479	0.009727	0.327	1.516
AA_DPB1_3_33151891	33151891	x	T	0.0229	0.0218	0.44	1.11964	1.03297	1.4919	0.0551	0.0627	0.919	0.978915	0.649039	1.47645	0.0245	0.0522	0.00856	-1.0163	0.3866	0.361932	0.169647	0.77216		t	x	0.8172	-++	46.4	0.02396	1.02685	0.820114	1.28571	NA	NA	NA	NA	NA	NA	0.0329	0.0383	0.0259	0.630466	0.420163	0.946029	0.007479	0.009727	0.327	1.516
AA_DPB1_35_33156517_F	33156517	A	P	0.5207	0.4587	1.16e-10	1.29997	1.02115	1.40795	0.4706	0.4396	0.608	1.05247	0.8655	1.27983	0.6365	0.6044	0.11	0.2316	0.1447	1.26062	0.949317	1.67399	99	a	p	1.955e-10	+++	-4.2	0.1466	1.26137	1.17429	1.35492	0.495024	0.443028	2.85e-05	1.28891	1.14409	1.45205	0.6243	0.6067	0.287	0.924113	0.799226	1.06852	0.4872	0.4194	0.000288	0.759
AA_DPB1_35_33156517_L	33156517	P	A	0.4419	0.3961	3.36e-06	1.21091	1.01557	1.3127	0.4064	0.3838	0.593	1.05778	0.86079	1.29984	0.509	0.5108	0.813	-0.03288	0.13894	0.967655	0.736974	1.27054		a	p	1.739e-05	--+	-14.9	0.1754	0.853167	0.793486	0.917337	0.467788	0.426919	0.000611	1.23141	1.09302	1.38732	0.5069	0.5411	0.0751	0.878865	0.762359	1.01318	0.4626	0.4027	0.000944	0.776
AA_DPB1_35_33156517_Y	33156517	P	A	0.0789	0.0628	0.000154	1.34017	1.04541	1.55966	0.0654	0.0597	0.834	0.958381	0.643256	1.42788	0.1281	0.0939	0.00413	0.6693	0.2334	1.95287	1.23595	3.08566		a	p	3.238e-05	-+-	24.7	0.07021	0.750437	0.655383	0.859277	0.0272179	0.0160953	0.00727	1.74961	1.16857	2.61954	0.1188	0.068	0.21	1.1769	0.912434	1.51802	0.02457	0.01691	0.207	0.724
AA_DPB1_36_33156520	33156520	A	V	0.1314	0.1397	0.649	0.972748	0.996717	1.09569	0.1748	0.1791	0.502	0.916182	0.709745	1.18266	0.2239	0.1748	0.0104	0.4498	0.1756	1.568	1.1114	2.21217	99	a	v	0.9191	--+	44.5	0.02719	1.00531	0.907012	1.11427	0.0528009	0.0659671	0.0245	0.752989	0.585531	0.96834	0.2012	0.1465	0.438	1.07891	0.890367	1.30738	0.08761	0.08268	0.543	0.922
AA_DPB1_-4_33151873	33151873	x	V	0.0229	0.0218	0.44	1.11968	1.03298	1.49195	0.0551	0.0627	0.919	0.978915	0.649039	1.47645	0.0245	0.0522	0.00856	-1.0163	0.3866	0.361932	0.169647	0.77216		v	x	0.8174	-++	46.4	0.02395	1.02685	0.820114	1.28571	NA	NA	NA	NA	NA	NA	0.0329	0.0383	0.0258	0.630304	0.420055	0.94579	0.007479	0.009727	0.327	1.516
AA_DPB1_4_33151894	33151894	x	P	0.0228	0.0218	0.447	1.11785	1.03251	1.48963	0.0551	0.0627	0.919	0.978974	0.64909	1.47651	0.0245	0.0522	0.00856	-1.0163	0.3866	0.361932	0.169647	0.77216		p	x	0.8104	-++	46.2	0.02421	1.02788	0.820934	1.287	0.00938168	0.0080028	0.287	1.56243	0.695729	3.50883	0.0327	0.0381	0.0267	0.631548	0.420635	0.948217	0.007479	0.009727	0.327	1.516
AA_DPB1_-5_33151870	33151870	x	S	0.0229	0.0218	0.44	1.11968	1.03298	1.49195	0.0551	0.0627	0.919	0.978915	0.649039	1.47645	0.0245	0.0522	0.00856	-1.0163	0.3866	0.361932	0.169647	0.77216		s	x	0.8174	-++	46.4	0.02395	1.02685	0.820114	1.28571	NA	NA	NA	NA	NA	NA	0.0329	0.0383	0.0258	0.630304	0.420055	0.94579	0.007479	0.009727	0.327	1.516
AA_DPB1_5_33156427	33156427	x	E	0.0229	0.0225	0.646	1.06961	1.01949	1.42492	0.0551	0.0629	0.923	0.979895	0.649688	1.47793	0.0246	0.0526	0.00763	-1.033	0.3872	0.355938	0.166641	0.760265		e	x	0.6294	-++	43.7	0.02865	1.05686	0.844242	1.32302	NA	NA	NA	NA	NA	NA	0.0337	0.0385	0.0247	0.627521	0.417817	0.942476	0.007479	0.01019	0.317	1.529
AA_DPB1_55_33156577_A	33156577	P	A	0.1315	0.1394	0.685	0.975681	0.997074	1.09901	0.1748	0.1768	0.541	0.923199	0.714508	1.19284	0.2223	0.1679	0.00418	0.5115	0.1786	1.66779	1.17521	2.36684		a	p	0.8052	++-	53.9	0.01304	0.987084	0.89039	1.09428	0.0528009	0.0659671	0.0245	0.752989	0.585531	0.96834	0.1987	0.1454	0.391	1.08789	0.897515	1.31866	0.08761	0.08268	0.543	0.922
AA_DPB1_55_33156577_D	33156577	P	A	0.4222	0.4608	1.37e-05	0.836549	0.985743	0.906638	0.4144	0.4306	0.891	1.01389	0.832496	1.2348	0.2572	0.3107	0.0268	-0.3281	0.1481	0.720291	0.538819	0.962882		a	p	1.086e-05	+-+	10.6	0.1068	1.17586	1.09403	1.26381	0.471772	0.503188	0.0105	0.85592	0.759655	0.964384	0.2841	0.3031	0.169	1.11685	0.954121	1.30733	0.5566	0.4898	0.000215	1.33
AA_DPB1_55_33156577_E	33156577	P	A	0.4467	0.3999	2.56e-06	1.21348	1.01572	1.31538	0.411	0.3933	0.734	1.03618	0.843809	1.2724	0.521	0.5225	0.809	-0.03304	0.13694	0.9675	0.73975	1.26537		a	p	1.95e-05	--+	1.4	0.1316	0.854277	0.794673	0.918351	0.475403	0.430837	0.000251	1.24929	1.10872	1.40768	0.5172	0.5515	0.0604	0.872485	0.756691	1.006	0.469	0.4074	0.000722	0.772
AA_DPB1_56_33156580	33156580	E	A	0.4218	0.4607	1.22e-05	0.835671	0.985663	0.905669	0.4145	0.4306	0.884	1.01484	0.83323	1.23603	0.2576	0.3108	0.0272	-0.3272	0.1481	0.72094	0.539304	0.963749		a	e	9.933e-06	+-+	11.4	0.1047	1.17657	1.09469	1.26456	0.471768	0.503184	0.0105	0.855926	0.759661	0.96439	0.2841	0.3031	0.171	1.11624	0.953627	1.30659	0.5566	0.4898	0.000215	1.33
AA_DPB1_57_33156583	33156583	D	E	0.1083	0.1047	0.468	1.04871	1.00613	1.19241	0.1648	0.156	0.336	1.13871	0.873978	1.48364	0.0928	0.1129	0.0803	-0.3894	0.2227	0.677463	0.437844	1.04822	99	d	e	0.5552	++-	3.9	0.1248	1.03417	0.924853	1.15641	0.14638	0.176838	0.00509	0.795419	0.676541	0.935185	0.108	0.1012	0.466	1.0868	0.868785	1.35952	0.1581	0.1744	0.255	1.127
AA_DPB1_-6_33151867	33151867	x	T	0.0229	0.0218	0.44	1.11968	1.03298	1.49195	0.0551	0.0627	0.919	0.978915	0.649039	1.47645	0.0245	0.0522	0.00856	-1.0163	0.3866	0.361932	0.169647	0.77216		t	x	0.8174	-++	46.4	0.02395	1.02685	0.820114	1.28571	NA	NA	NA	NA	NA	NA	0.0329	0.0383	0.0258	0.630304	0.420055	0.94579	0.007479	0.009727	0.327	1.516
AA_DPB1_65_33156607_I	33156607	A	P	0.0687	0.0573	0.03	1.19674	1.02957	1.40755	0.1074	0.0949	0.253	1.21555	0.869563	1.69921	0.0883	0.0901	0.38	-0.2013	0.2294	0.817667	0.521564	1.28188	99	a	p	0.03943	++-	-57.5	0.2809	1.15708	1.00696	1.32958	0.0800324	0.0725241	0.172	1.16784	0.935955	1.45718	0.0872	0.0711	0.324	1.14149	0.877746	1.48449	0.08654	0.07341	0.105	0.794
AA_DPB1_65_33156607_L	33156607	P	A	0.0682	0.0568	0.0297	1.19722	1.02964	1.40811	0.1073	0.0947	0.243	1.22104	0.873485	1.70687	0.0877	0.0893	0.382	-0.2004	0.2294	0.818403	0.522033	1.28303		a	p	0.0379	--+	-57	0.2798	0.863208	0.751215	0.991897	0.0776183	0.0701084	0.198	1.15836	0.927217	1.44712	0.0865	0.0705	0.332	1.13876	0.8758	1.48067	0.08654	0.07341	0.105	0.794
AA_DPB1_69_33156619_E	33156619	P	A	0.4156	0.4316	0.107	0.93614	0.994721	1.01431	0.36	0.3839	0.166	0.868402	0.711323	1.06017	0.4009	0.4015	0.563	0.07782	0.13459	1.08093	0.830293	1.40722		a	p	0.07497	++-	0	0.4305	1.06727	0.993581	1.14642	0.390074	0.410961	0.0489	0.883969	0.781676	0.999649	0.3514	0.3639	0.497	1.05156	0.909657	1.2156	NA	NA	NA	NA
AA_DPB1_69_33156619_K	33156619	A	P	0.4174	0.4333	0.112	0.937002	0.994795	1.01525	0.3608	0.3886	0.116	0.851973	0.697866	1.04011	0.4012	0.4018	0.564	0.07762	0.13462	1.08071	0.830078	1.40702	99	a	p	0.06749	--+	0	0.3689	0.935382	0.870803	1.00475	0.390074	0.410961	0.0489	0.883969	0.781676	0.999649	0.352	0.3657	0.537	1.04672	0.905402	1.2101	NA	NA	NA	NA
AA_DPB1_-7_33151864	33151864	x	L	0.0229	0.0218	0.44	1.11968	1.03298	1.49195	0.0551	0.0627	0.919	0.978915	0.649039	1.47645	0.0245	0.0522	0.00856	-1.0163	0.3866	0.361932	0.169647	0.77216		l	x	0.8174	-++	46.4	0.02395	1.02685	0.820114	1.28571	NA	NA	NA	NA	NA	NA	0.0329	0.0383	0.0258	0.630304	0.420055	0.94579	0.007479	0.009727	0.327	1.516
AA_DPB1_76_33156640_I	33156640	P	A	0.0811	0.0642	0.000167	1.33292	1.04393	1.54802	0.0669	0.0588	0.979	1.00536	0.677649	1.49156	0.1358	0.0961	0.00198	0.6961	0.225	2.00591	1.29059	3.11771		a	p	1.709e-05	---	23.9	0.07216	0.746395	0.65326	0.852809	0.0346104	0.0197511	0.00219	1.74368	1.22468	2.48263	0.0951	0.067	0.0814	1.25719	0.971822	1.62635	0.03098	0.01992	0.0799	0.665
AA_DPB1_76_33156640_M	33156640	A	P	0.1714	0.1521	0.00309	1.17456	1.0173	1.30669	0.1882	0.1738	0.542	1.08272	0.838432	1.39819	0.2279	0.2052	0.286	0.1749	0.1638	1.19113	0.86403	1.64205	99	a	p	0.001647	+++	0	0.8374	1.16311	1.05868	1.27785	0.175283	0.192119	0.136	0.891785	0.766717	1.03725	0.228	0.1587	0.0239	1.23069	1.02779	1.47364	0.1816	0.1867	0.729	1.035
AA_DPB1_76_33156640_V	33156640	P	A	0.0904	0.0879	0.655	1.03226	1.00443	1.18643	0.1216	0.1155	0.48	1.11594	0.823091	1.51299	0.0925	0.1098	0.0758	-0.395	0.2224	0.67368	0.435655	1.04175		a	p	0.8593	--+	-4.7	0.1479	0.98906	0.875885	1.11686	0.140665	0.172361	0.00298	0.781681	0.663096	0.921473	0.1329	0.0917	0.194	1.16288	0.926074	1.46024	0.1506	0.167	0.27	1.125
AA_DPB1_-8_33151861	33151861	x	L	0.0229	0.0218	0.44	1.1197	1.03299	1.49198	0.0551	0.0627	0.919	0.978915	0.649039	1.47645	0.0245	0.0522	0.00856	-1.0163	0.3866	0.361932	0.169647	0.77216		l	x	0.8175	-++	46.4	0.02395	1.02685	0.820114	1.28571	NA	NA	NA	NA	NA	NA	0.0329	0.0383	0.0258	0.630304	0.420055	0.94579	0.007479	0.009727	0.327	1.516
AA_DPB1_8_33156436	33156436	V	L	0.1894	0.1696	0.0018	1.17856	1.01709	1.30662	0.2346	0.2207	0.452	1.09386	0.865904	1.38182	0.236	0.2326	0.808	0.03856	0.15871	1.03931	0.761465	1.41854		l	v	0.001974	---	0	0.6715	0.867101	0.792188	0.949097	0.174232	0.19359	0.095	0.878935	0.754811	1.02347	0.2423	0.1839	0.202	1.11933	0.941262	1.33108	0.1859	0.1931	0.561	1.06
AA_DPB1_84_33156664_D	33156664	A	P	0.4154	0.4728	2.85e-09	0.786872	0.981222	0.851629	0.3993	0.4428	0.106	0.854089	0.705575	1.03386	0.3556	0.3476	0.797	0.03634	0.14154	1.03701	0.78578	1.36856	99	a	p	5.199e-09	--+	-3.7	0.1453	0.810098	0.75476	0.869494	0.393638	0.417058	0.0262	0.87295	0.774202	0.984293	0.3233	0.3602	0.949	0.995318	0.860864	1.15078	NA	NA	NA	NA
AA_DPB1_84_33156664_G	33156664	P	A	0.4136	0.471	2.74e-09	0.786518	0.981174	0.851296	0.399	0.4363	0.171	0.875185	0.723102	1.05925	0.3535	0.3405	0.636	0.0671	0.1416	1.0694	0.810231	1.41148		a	p	1.208e-08	++-	19.9	0.08244	1.22826	1.14436	1.31832	0.393638	0.417058	0.0262	0.87295	0.774202	0.984293	0.3208	0.3581	0.951	1.00457	0.868537	1.16191	NA	NA	NA	NA
AA_DPB1_84_33156664_V	33156664	P	A	0.0017	0.0018	0.969	1.01889	1.01798	2.64083	0.0005	0.0069	0.297	0.00389992	1.14845e-07	132.434	0.0022	0.0076	0.113	-1.9362	1.2228	0.144251	0.0131296	1.58485		a	p	0.5254	-++	-25.3	0.2028	1.33069	0.550954	3.21396	NA	NA	NA	NA	NA	NA	0.0025	0.0021	0.109	0.25254	0.0469083	1.3596	NA	NA	NA	NA
AA_DPB1_85_33156667	33156667	G	E	0.4153	0.4727	2.84e-09	0.786872	0.981222	0.851629	0.3993	0.4428	0.106	0.854311	0.705759	1.03413	0.3556	0.3477	0.796	0.03652	0.14154	1.0372	0.785921	1.36881	99	g	e	5.24e-09	--+	-3.5	0.1448	0.810179	0.754835	0.869581	0.393611	0.417006	0.0261	0.872899	0.77415	0.984243	0.3233	0.3602	0.949	0.995317	0.860859	1.15079	0.3953	0.4409	0.0119	1.217
AA_DPB1_86_33156670	33156670	P	A	0.4153	0.4727	2.82e-09	0.78684	0.981219	0.851595	0.3993	0.4428	0.106	0.854311	0.705759	1.03413	0.3557	0.3477	0.797	0.03647	0.14154	1.03714	0.785882	1.36874		a	p	5.209e-09	++-	-3.5	0.1447	1.23442	1.15009	1.32493	0.393642	0.417031	0.0262	0.872971	0.774221	0.984316	0.3233	0.3603	0.947	0.995075	0.86063	1.15052	0.3953	0.4409	0.0119	1.217
AA_DPB1_87_33156673	33156673	M	V	0.4153	0.4727	2.87e-09	0.786935	0.981229	0.851697	0.3994	0.4429	0.106	0.854354	0.705767	1.03422	0.3558	0.3476	0.793	0.0371	0.1416	1.0378	0.786285	1.36976	99	m	v	5.331e-09	--+	-3.2	0.1441	0.81026	0.754911	0.869668	0.393637	0.417031	0.0262	0.872954	0.774206	0.984297	0.3232	0.3602	0.948	0.995219	0.86079	1.15065	0.3953	0.4409	0.0119	1.217
AA_DPB1_-9_33151858	33151858	x	V	0.0229	0.0218	0.44	1.1197	1.03299	1.49198	0.0551	0.0627	0.919	0.978915	0.649039	1.47645	0.0245	0.0522	0.00856	-1.0163	0.3866	0.361932	0.169647	0.77216		v	x	0.8175	-++	46.4	0.02395	1.02685	0.820114	1.28571	NA	NA	NA	NA	NA	NA	0.0329	0.0383	0.0258	0.630304	0.420055	0.94579	0.007479	0.009727	0.327	1.516
AA_DPB1_9_33156439_F	33156439	A	P	0.1895	0.1695	0.0017	1.17958	1.01718	1.30776	0.2346	0.2207	0.452	1.0939	0.865939	1.38187	0.2361	0.2327	0.813	0.03752	0.15866	1.03823	0.760748	1.41693	99	a	p	0.001892	+++	0	0.6641	1.15385	1.05416	1.26296	0.17421	0.193535	0.0953	0.879069	0.75494	1.02361	0.2424	0.1838	0.204	1.11866	0.940862	1.33006	0.1859	0.1931	0.561	1.06
AA_DPB1_9_33156439_H	33156439	P	A	0.0653	0.0661	0.909	1.00947	1.00152	1.18568	0.0981	0.1013	0.835	1.03456	0.751948	1.4234	0.0461	0.054	0.333	-0.2961	0.3056	0.743713	0.408577	1.35375		a	p	0.9722	--+	0	0.6083	1.0025	0.871754	1.15286	0.0953976	0.12517	0.000466	0.71702	0.592947	0.867056	0.0551	0.0643	0.622	0.930877	0.700091	1.23774	0.1068	0.1163	0.317	1.131
AA_DPB1_9_33156439_Y	33156439	P	A	0.1241	0.1034	0.0002	1.26419	1.02938	1.43042	0.1365	0.1196	0.435	1.12896	0.832369	1.53124	0.1899	0.179	0.407	0.1499	0.1808	1.16172	0.815081	1.65577		a	p	0.0001369	---	0	0.7465	0.808965	0.725441	0.902105	0.0788174	0.0683524	0.0652	1.23778	0.988366	1.55013	0.1874	0.1196	0.0669	1.2103	0.986775	1.48446	0.07906	0.07712	0.728	0.951
AA_DPB1_96_33160714_K	33160714	P	A	0.5658	0.5095	8.96e-09	1.26001	1.01838	1.36331	0.5478	0.5036	0.17	1.14138	0.945003	1.37857	0.6248	0.6099	0.546	0.08422	0.13944	1.08787	0.827718	1.42978		a	p	6.889e-09	---	0	0.4195	0.812451	0.757248	0.871677	0.605296	0.581302	0.0255	1.14627	1.01656	1.29254	0.6424	0.6041	0.382	1.06593	0.923791	1.22993	0.3942	0.4421	0.00828	1.229
AA_DPB1_96_33160714_R	33160714	P	A	0.4321	0.4889	6.76e-09	0.792169	0.981815	0.857094	0.4449	0.4854	0.21	0.886459	0.734085	1.07046	0.3584	0.3571	0.943	0.01022	0.14176	1.01027	0.765191	1.33385		a	p	1.869e-08	++-	-12.6	0.1693	1.2236	1.14046	1.3128	0.390348	0.414877	0.0192	0.866144	0.76771	0.977199	0.3313	0.3778	0.477	0.948871	0.821054	1.09659	0.3942	0.4412	0.00943	1.225
AA_DQA1_107_32717784_I	32717784	P	A	0.1005	0.1187	0.00258	0.822333	0.975421	0.9339	0.1286	0.1635	0.029	0.742895	0.568842	0.970205	0.1704	0.1944	0.805	-0.04336	0.17526	0.957567	0.67918	1.35006		a	p	0.000387	+++	0	0.5194	1.21799	1.09223	1.35822	NA	NA	NA	NA	NA	NA	0.146	0.2172	1.48e-07	0.620698	0.519545	0.741546	NA	NA	NA	NA
AA_DQA1_107_32717784_T	32717784	A	P	0.1006	0.1188	0.00261	0.822497	0.975446	0.934086	0.1286	0.1635	0.029	0.742895	0.568842	0.970205	0.1704	0.1944	0.805	-0.04334	0.17526	0.957586	0.679193	1.35009	99	a	p	0.0003909	---	0	0.5193	0.821109	0.736331	0.915647	NA	NA	NA	NA	NA	NA	0.146	0.2172	1.48e-07	0.620702	0.519548	0.741551	NA	NA	NA	NA
AA_DQA1_11_32717083	32717083	C	Y	0.4706	0.4405	0.00357	1.12395	1.00923	1.21585	0.4896	0.4047	6.13e-05	1.48309	1.22309	1.79836	0.5396	0.3683	1.39e-06	0.6539	0.1355	1.92303	1.4745	2.50799	99	c	y	9.438e-08	+++	79.3	6.263e-05	1.21058	1.12855	1.29858	NA	NA	NA	NA	NA	NA	0.4859	0.3451	9.44e-15	1.73962	1.51223	2.00122	NA	NA	NA	NA
AA_DQA1_129_32717850_H	32717850	A	P	0.337	0.3283	0.403	1.03587	1.00292	1.1251	0.4009	0.312	1.57e-05	1.55426	1.27237	1.8986	0.4378	0.3183	0.000585	0.4638	0.1349	1.5901	1.22067	2.07136	99	a	p	0.001037	+++	80.4	3.687e-05	1.13066	1.05074	1.21665	NA	NA	NA	NA	NA	NA	0.3807	0.2385	2.69e-14	1.78971	1.54063	2.07906	NA	NA	NA	NA
AA_DQA1_129_32717850_Q	32717850	P	A	0.3369	0.3282	0.406	1.03567	1.0029	1.12489	0.4007	0.3117	1.54e-05	1.55473	1.27276	1.89917	0.4378	0.3183	0.000585	0.4638	0.1349	1.5901	1.22067	2.07136		a	p	0.001048	---	80.4	3.62e-05	0.884529	0.822009	0.951804	NA	NA	NA	NA	NA	NA	0.3807	0.2384	2.64e-14	1.78999	1.54088	2.07937	NA	NA	NA	NA
AA_DQA1_130_32717853_A	32717853	P	A	0.1335	0.1123	0.0013	1.20982	1.02235	1.35872	0.0891	0.0933	0.786	0.955376	0.687028	1.32854	0.1018	0.0501	0.00707	0.7072	0.2625	2.0283	1.21252	3.39295		a	p	0.0005817	-+-	31.5	0.05386	0.828615	0.74452	0.922208	NA	NA	NA	NA	NA	NA	0.1052	0.1071	0.336	1.11508	0.893142	1.39216	NA	NA	NA	NA
AA_DQA1_130_32717853_S	32717853	A	P	0.1336	0.1124	0.00132	1.20954	1.02233	1.35846	0.0891	0.0933	0.787	0.955462	0.687089	1.32866	0.1018	0.0501	0.00707	0.7072	0.2625	2.0283	1.21252	3.39295	99	a	p	0.0005913	+-+	31.5	0.05391	1.20659	1.08392	1.34314	NA	NA	NA	NA	NA	NA	0.1053	0.1071	0.331	1.11637	0.894236	1.39368	NA	NA	NA	NA
AA_DQA1_156_32717931_F	32717931	A	P	0.1009	0.1189	0.00285	0.823979	0.975677	0.935733	0.1287	0.1635	0.029	0.742821	0.568785	0.970108	0.1704	0.1944	0.805	-0.04335	0.17526	0.957576	0.679186	1.35007	99	a	p	0.0004259	---	0	0.5186	0.822177	0.737289	0.916838	NA	NA	NA	NA	NA	NA	0.146	0.2172	1.55e-07	0.621157	0.519927	0.742095	NA	NA	NA	NA
AA_DQA1_156_32717931_L	32717931	P	A	0.1005	0.1187	0.00258	0.822349	0.975423	0.933918	0.1287	0.1635	0.029	0.742821	0.568785	0.970108	0.1704	0.1944	0.805	-0.04335	0.17526	0.957576	0.679186	1.35007		a	p	0.0003869	+++	0	0.5191	1.21799	1.09223	1.35822	NA	NA	NA	NA	NA	NA	0.146	0.2172	1.55e-07	0.621157	0.519927	0.742095	NA	NA	NA	NA
AA_DQA1_-16_32713236_L	32713236	A	P	0.4724	0.5027	0.00361	0.889701	0.990843	0.962562	0.4491	0.5102	0.00532	0.76325	0.631187	0.922944	0.3874	0.5066	0.00092	-0.4455	0.1344	0.640504	0.492173	0.833538	99	a	p	6.731e-06	---	42.5	0.03086	0.851292	0.793606	0.913171	NA	NA	NA	NA	NA	NA	0.4229	0.5483	1.13e-09	0.649549	0.56533	0.746313	NA	NA	NA	NA
AA_DQA1_-16_32713236_M	32713236	P	A	0.4713	0.5016	0.00361	0.889452	0.990801	0.962463	0.4482	0.5093	0.0053	0.762815	0.63063	0.922707	0.3874	0.5066	0.00092	-0.4455	0.1344	0.640504	0.492173	0.833538		a	p	6.656e-06	+++	42.4	0.03104	1.17515	1.09552	1.26058	NA	NA	NA	NA	NA	NA	0.4217	0.5467	1.14e-09	0.649101	0.564797	0.745988	NA	NA	NA	NA
AA_DQA1_161_32717946_D	32717946	A	P	0.1008	0.1189	0.00273	0.823254	0.97556	0.934946	0.1287	0.1635	0.029	0.742821	0.568785	0.970108	0.1704	0.1944	0.805	-0.04333	0.17526	0.957595	0.6792	1.3501	99	a	p	0.0004089	---	0	0.5188	0.821683	0.736846	0.916289	NA	NA	NA	NA	NA	NA	0.146	0.2172	1.55e-07	0.621157	0.519927	0.742095	NA	NA	NA	NA
AA_DQA1_161_32717946_E	32717946	P	A	0.1006	0.1188	0.0026	0.822423	0.975435	0.934002	0.1287	0.1635	0.029	0.742821	0.568785	0.970108	0.1704	0.1944	0.805	-0.04333	0.17526	0.957595	0.6792	1.3501		a	p	0.0003887	+++	0	0.519	1.21787	1.09212	1.35809	NA	NA	NA	NA	NA	NA	0.146	0.2172	1.55e-07	0.621158	0.519929	0.742097	NA	NA	NA	NA
AA_DQA1_163_32717952_I	32717952	A	P	0.1007	0.1188	0.00271	0.823114	0.975539	0.934787	0.1287	0.1635	0.029	0.742821	0.568785	0.970108	0.1704	0.1944	0.805	-0.04334	0.17526	0.957586	0.679193	1.35009	99	a	p	0.0004054	---	0	0.5189	0.821601	0.736773	0.916197	NA	NA	NA	NA	NA	NA	0.146	0.2172	1.55e-07	0.621157	0.519927	0.742095	NA	NA	NA	NA
AA_DQA1_163_32717952_S	32717952	P	A	0.1005	0.1187	0.00259	0.822358	0.975425	0.933928	0.1287	0.1635	0.029	0.742821	0.568785	0.970108	0.1704	0.1944	0.805	-0.04334	0.17526	0.957586	0.679193	1.35009		a	p	0.0003872	+++	0	0.5191	1.21799	1.09223	1.35822	NA	NA	NA	NA	NA	NA	0.146	0.2172	1.55e-07	0.621158	0.519929	0.742097	NA	NA	NA	NA
AA_DQA1_175_32717988_E	32717988	P	A	0.4298	0.4412	0.348	0.962857	0.997014	1.04202	0.3823	0.4323	0.0163	0.79236	0.655363	0.957994	0.2901	0.4375	9.72e-07	-0.7011	0.1432	0.496039	0.374647	0.656766		a	p	0.003035	+++	81.7	1.809e-05	1.11271	1.0369	1.19406	NA	NA	NA	NA	NA	NA	0.3682	0.4387	0.000164	0.768628	0.670331	0.881339	NA	NA	NA	NA
AA_DQA1_175_32717988_K	32717988	P	A	0.1005	0.1187	0.00259	0.822358	0.975425	0.933928	0.1287	0.1635	0.029	0.742895	0.568842	0.970205	0.1704	0.1944	0.805	-0.04332	0.17526	0.957605	0.679207	1.35011		a	p	0.0003877	+++	0	0.5193	1.21799	1.09223	1.35822	NA	NA	NA	NA	NA	NA	0.146	0.2172	1.56e-07	0.62121	0.519975	0.742155	NA	NA	NA	NA
AA_DQA1_175_32717988_Q	32717988	P	A	0.4697	0.4402	0.00391	1.12276	1.00915	1.21464	0.4896	0.4047	6.15e-05	1.48302	1.22301	1.79831	0.5396	0.3683	1.39e-06	0.6538	0.1355	1.92283	1.47435	2.50774		a	p	1.082e-07	---	79.4	6.003e-05	0.826628	0.770614	0.886715	NA	NA	NA	NA	NA	NA	0.4858	0.345	9.71e-15	1.7392	1.51185	2.00073	NA	NA	NA	NA
AA_DQA1_18_32717104	32717104	F	S	0.4706	0.4405	0.00357	1.12395	1.00923	1.21585	0.4896	0.4047	6.13e-05	1.48309	1.22309	1.79836	0.5396	0.3683	1.39e-06	0.6539	0.1355	1.92303	1.4745	2.50799	99	f	s	9.438e-08	+++	79.3	6.263e-05	1.21058	1.12855	1.29858	NA	NA	NA	NA	NA	NA	0.4859	0.3451	9.45e-15	1.7396	1.51221	2.00119	NA	NA	NA	NA
AA_DQA1_187_32718380_A	32718380	A	P	0.287	0.3191	0.000354	0.853594	0.986346	0.931041	0.2015	0.234	0.00954	0.741856	0.591915	0.929779	0.1947	0.2766	0.00168	-0.495	0.1576	0.609571	0.447582	0.830187	99	a	p	8.546e-07	---	21.8	0.07746	0.821273	0.759344	0.888252	NA	NA	NA	NA	NA	NA	0.2386	0.2889	0.03	0.845781	0.72704	0.983915	NA	NA	NA	NA
AA_DQA1_187_32718380_T	32718380	P	A	0.287	0.3191	0.000355	0.853645	0.986351	0.931096	0.2015	0.234	0.00953	0.741856	0.591915	0.929779	0.1947	0.2766	0.00169	-0.495	0.1576	0.609571	0.447582	0.830187		a	p	8.599e-07	+++	21.8	0.07737	1.21762	1.12581	1.31693	NA	NA	NA	NA	NA	NA	0.2385	0.2888	0.0303	0.845977	0.72719	0.984167	NA	NA	NA	NA
AA_DQA1_207_32718440_M	32718440	P	A	0.2512	0.2314	0.00898	1.1334	1.01183	1.24503	0.3023	0.2255	1.78e-05	1.60063	1.29122	1.9842	0.3138	0.1976	0.00017	0.5862	0.1559	1.79715	1.32397	2.43943		a	p	6.399e-07	---	72.6	0.0006767	0.810179	0.745718	0.880212	NA	NA	NA	NA	NA	NA	0.2641	0.1552	6.15e-13	1.91934	1.60709	2.29225	NA	NA	NA	NA
AA_DQA1_207_32718440_V	32718440	A	P	0.2512	0.2314	0.00896	1.13345	1.01184	1.2451	0.3023	0.2259	1.85e-05	1.59935	1.28993	1.983	0.3138	0.1975	0.00017	0.5862	0.1559	1.79715	1.32397	2.43943	99	a	p	6.54e-07	+++	72.5	0.0006933	1.23405	1.13586	1.34072	NA	NA	NA	NA	NA	NA	0.2641	0.1552	6.15e-13	1.91935	1.6071	2.29227	NA	NA	NA	NA
AA_DQA1_215_32718464_F	32718464	A	P	0.3619	0.3685	0.635	0.98013	0.998339	1.06479	0.316	0.3412	0.2	0.877569	0.71855	1.07178	0.2169	0.3084	0.000597	-0.535	0.1558	0.585669	0.431552	0.794826	99	a	p	0.0826	---	62.4	0.004884	0.936412	0.869372	1.00862	NA	NA	NA	NA	NA	NA	0.2699	0.3245	0.0195	0.837105	0.721118	0.971747	NA	NA	NA	NA
AA_DQA1_215_32718464_L	32718464	P	A	0.3732	0.3843	0.358	0.962588	0.996905	1.04412	0.3207	0.3471	0.211	0.882144	0.724849	1.07357	0.2172	0.3125	0.000361	-0.5493	0.154	0.577354	0.426928	0.780781		a	p	0.03155	+++	61.9	0.005219	1.08329	1.00711	1.16522	NA	NA	NA	NA	NA	NA	0.2761	0.3309	0.0279	0.847949	0.731983	0.982288	NA	NA	NA	NA
AA_DQA1_218_32718473_Q	32718473	P	A	0.4701	0.4404	0.00377	1.12334	1.00919	1.21532	0.4895	0.4049	6.14e-05	1.48378	1.22334	1.79965	0.5396	0.3683	1.39e-06	0.6537	0.1355	1.92264	1.47421	2.50748		a	p	1.024e-07	---	79.4	6.141e-05	0.826298	0.770155	0.886534	NA	NA	NA	NA	NA	NA	0.4859	0.3451	7.57e-15	1.74338	1.51543	2.00561	NA	NA	NA	NA
AA_DQA1_218_32718473_R	32718473	A	P	0.4711	0.4412	0.00347	1.12474	1.00931	1.21699	0.4903	0.4059	6.17e-05	1.48508	1.22385	1.80208	0.54	0.3691	1.37e-06	0.6562	0.1359	1.92745	1.47674	2.51573	99	a	p	9.059e-08	+++	79.3	6.306e-05	1.21167	1.12934	1.3	NA	NA	NA	NA	NA	NA	0.4864	0.3438	2.78e-15	1.76408	1.53235	2.03084	NA	NA	NA	NA
AA_DQA1_25_32717125	32717125	F	Y	0.2528	0.2179	7.57e-06	1.22983	1.01891	1.34642	0.2577	0.2856	0.472	0.924853	0.747372	1.14448	0.1861	0.197	0.5	-0.1111	0.1646	0.894849	0.648096	1.23555	99	f	y	0.000388	+--	52.5	0.0148	1.15731	1.06753	1.25464	NA	NA	NA	NA	NA	NA	0.2213	0.2502	0.043	0.847885	0.722667	0.994799	NA	NA	NA	NA
AA_DQA1_26_32717128	32717128	S	T	0.2851	0.3182	0.000232	0.849498	0.985937	0.926555	0.2015	0.234	0.00954	0.74193	0.591974	0.929872	0.1946	0.2766	0.00168	-0.4952	0.1576	0.609449	0.447492	0.830021		t	s	5.139e-07	+++	18.9	0.0849	1.22238	1.13021	1.32207	NA	NA	NA	NA	NA	NA	0.2385	0.2889	0.0287	0.84465	0.726065	0.982603	NA	NA	NA	NA
AA_DQA1_34_32717152	32717152	E	Q	0.4569	0.4802	0.0159	0.905326	0.991995	0.981524	0.4191	0.4333	0.371	0.917236	0.759095	1.10832	0.3411	0.4333	0.00146	-0.4558	0.1432	0.633941	0.4788	0.83935	99	e	q	0.0009702	---	31.8	0.05319	0.886123	0.82462	0.952212	NA	NA	NA	NA	NA	NA	0.3926	0.4141	0.5	0.953157	0.82919	1.09566	NA	NA	NA	NA
AA_DQA1_40_32717170	32717170	G	E	0.1578	0.1756	0.0113	0.872546	0.985718	0.969637	0.1901	0.2487	0.00122	0.689147	0.549968	0.86355	0.2433	0.3193	0.0393	-0.3078	0.1494	0.735062	0.548469	0.985136	99	g	e	3.74e-05	---	3	0.1272	0.82605	0.75424	0.904696	NA	NA	NA	NA	NA	NA	0.2381	0.325	2.43e-10	0.612534	0.5263	0.712897	NA	NA	NA	NA
AA_DQA1_41_32717173	32717173	K	R	0.1355	0.1147	0.00151	1.20627	1.02196	1.35441	0.0944	0.0997	0.782	0.955195	0.68996	1.32239	0.102	0.0519	0.0096	0.6763	0.2612	1.96659	1.17862	3.28134	99	k	r	0.0007444	+-+	26.9	0.06477	1.20154	1.0798	1.33699	NA	NA	NA	NA	NA	NA	0.1084	0.1083	0.24	1.14239	0.914835	1.42654	NA	NA	NA	NA
AA_DQA1_45_32717185	32717185	A	V	0.4706	0.4406	0.00356	1.124	1.00923	1.2159	0.4896	0.4047	6.17e-05	1.48286	1.2229	1.79807	0.5396	0.3683	1.39e-06	0.6539	0.1355	1.92303	1.4745	2.50799	99	a	v	9.423e-08	+++	79.3	6.296e-05	1.21058	1.12855	1.29858	NA	NA	NA	NA	NA	NA	0.4859	0.3451	9.34e-15	1.7398	1.51237	2.00142	NA	NA	NA	NA
AA_DQA1_47_32717191_C	32717191	P	A	0.1578	0.1756	0.0114	0.872694	0.985731	0.96984	0.1901	0.2487	0.00123	0.689147	0.549968	0.86355	0.2433	0.3193	0.0393	-0.3078	0.1494	0.735062	0.548469	0.985136		a	p	3.793e-05	+++	3.1	0.1269	1.21046	1.10523	1.3257	NA	NA	NA	NA	NA	NA	0.2381	0.325	2.41e-10	0.612486	0.526259	0.712841	NA	NA	NA	NA
AA_DQA1_47_32717191_K	32717191	P	A	0.0865	0.0656	1.91e-06	1.42708	1.05343	1.65199	0.1195	0.1134	0.114	1.27201	0.943552	1.71481	0.0226	0.0361	0.168	-0.5498	0.3986	0.577065	0.264198	1.26043		a	p	2.956e-06	--+	23.6	0.07304	0.734107	0.644903	0.835651	NA	NA	NA	NA	NA	NA	0.0376	0.0425	0.816	0.958721	0.671695	1.3684	NA	NA	NA	NA
AA_DQA1_47_32717191_Q	32717191	P	A	0.2851	0.3182	0.00023	0.849421	0.985926	0.92649	0.2015	0.234	0.00951	0.741856	0.591915	0.929779	0.1946	0.2766	0.00168	-0.4952	0.1576	0.609449	0.447492	0.830021		a	p	5.097e-07	+++	18.9	0.085	1.2225	1.13032	1.3222	NA	NA	NA	NA	NA	NA	0.2386	0.2889	0.0292	0.845072	0.726421	0.983102	NA	NA	NA	NA
AA_DQA1_47_32717191_R	32717191	P	A	0.4706	0.4406	0.00356	1.124	1.00923	1.2159	0.4896	0.4047	6.17e-05	1.48287	1.22291	1.79809	0.5396	0.3683	1.39e-06	0.6539	0.1355	1.92303	1.4745	2.50799		a	p	9.421e-08	---	79.3	6.294e-05	0.82605	0.770075	0.886094	NA	NA	NA	NA	NA	NA	0.4859	0.3451	9.34e-15	1.7398	1.51237	2.00142	NA	NA	NA	NA
AA_DQA1_48_32717194	32717194	W	L	0.4706	0.4405	0.00356	1.12397	1.00923	1.21588	0.4896	0.4047	6.17e-05	1.48287	1.22291	1.79809	0.5396	0.3683	1.39e-06	0.6539	0.1355	1.92303	1.4745	2.50799		l	w	9.444e-08	---	79.3	6.288e-05	0.82605	0.770075	0.886094	NA	NA	NA	NA	NA	NA	0.4859	0.3451	9.43e-15	1.73966	1.51225	2.00126	NA	NA	NA	NA
AA_DQA1_50_32717200_E	32717200	P	A	0.4706	0.4405	0.00356	1.12397	1.00923	1.21588	0.4896	0.4047	6.17e-05	1.48287	1.22291	1.79809	0.5396	0.3683	1.39e-06	0.6539	0.1355	1.92303	1.4745	2.50799		a	p	9.444e-08	---	79.3	6.288e-05	0.82605	0.770075	0.886094	NA	NA	NA	NA	NA	NA	0.4859	0.3451	9.43e-15	1.73966	1.51225	2.00126	NA	NA	NA	NA
AA_DQA1_50_32717200_L	32717200	P	A	0.3716	0.3839	0.313	0.959071	0.996614	1.04016	0.3208	0.3471	0.211	0.882232	0.725064	1.07347	0.2172	0.3126	0.000358	-0.5498	0.154	0.577065	0.426715	0.780391		a	p	0.02573	+++	61.4	0.005637	1.08632	1.01014	1.16826	NA	NA	NA	NA	NA	NA	0.2761	0.3309	0.0283	0.848301	0.732286	0.982696	NA	NA	NA	NA
AA_DQA1_50_32717200_V	32717200	P	A	0.1577	0.1755	0.0114	0.872563	0.985715	0.969695	0.1901	0.2487	0.00123	0.689147	0.549968	0.86355	0.2433	0.3193	0.0393	-0.3078	0.1494	0.735062	0.548469	0.985136		a	p	3.754e-05	+++	3	0.1272	1.21058	1.10534	1.32584	NA	NA	NA	NA	NA	NA	0.2381	0.325	2.41e-10	0.612473	0.526248	0.712826	NA	NA	NA	NA
AA_DQA1_51_32717203	32717203	L	F	0.1578	0.1756	0.0114	0.872686	0.98573	0.96983	0.1901	0.2487	0.00122	0.689147	0.549968	0.86355	0.2433	0.3193	0.0393	-0.3078	0.1494	0.735062	0.548469	0.985136		f	l	3.79e-05	+++	3.1	0.1269	1.21046	1.10523	1.3257	NA	NA	NA	NA	NA	NA	0.2381	0.325	2.4e-10	0.612439	0.526218	0.712787	NA	NA	NA	NA
AA_DQA1_52_32717206_H	32717206	P	A	0.0865	0.0656	1.89e-06	1.42724	1.05344	1.65218	0.1195	0.1134	0.114	1.27214	0.943646	1.71498	0.0226	0.0361	0.168	-0.5498	0.3986	0.577065	0.264198	1.26043		a	p	2.933e-06	--+	23.6	0.073	0.734034	0.644838	0.835568	NA	NA	NA	NA	NA	NA	0.0376	0.0425	0.809	0.957024	0.670455	1.36608	NA	NA	NA	NA
AA_DQA1_52_32717206_R	32717206	P	A	0.443	0.4938	1.05e-07	0.80642	0.983083	0.872975	0.3914	0.4825	9.52e-07	0.618598	0.510492	0.749597	0.4379	0.5958	1.08e-05	-0.5916	0.1344	0.553441	0.425273	0.720236		a	p	1.19e-14	+++	67	0.002336	1.32049	1.23052	1.41703	NA	NA	NA	NA	NA	NA	0.4766	0.6134	2.97e-14	0.585754	0.510277	0.672394	NA	NA	NA	NA
AA_DQA1_52_32717206_S	32717206	P	A	0.4705	0.4405	0.00367	1.12359	1.0092	1.21549	0.4896	0.4047	6.17e-05	1.4829	1.22293	1.79813	0.5396	0.3683	1.39e-06	0.6539	0.1355	1.92303	1.4745	2.50799		a	p	9.855e-08	---	79.4	6.193e-05	0.826215	0.770229	0.886271	NA	NA	NA	NA	NA	NA	0.4859	0.3451	9.48e-15	1.73957	1.51218	2.00116	NA	NA	NA	NA
AA_DQA1_53_32717209_K	32717209	P	A	0.4704	0.4405	0.0037	1.12349	1.0092	1.21538	0.4896	0.4047	6.16e-05	1.48293	1.22296	1.79816	0.5396	0.3683	1.39e-06	0.6539	0.1355	1.92303	1.4745	2.50799		a	p	9.96e-08	---	79.4	6.165e-05	0.826298	0.770306	0.88636	NA	NA	NA	NA	NA	NA	0.4859	0.3451	9.64e-15	1.73931	1.51195	2.00086	NA	NA	NA	NA
AA_DQA1_53_32717209_Q	32717209	P	A	0.1579	0.1757	0.0116	0.872939	0.985757	0.970131	0.1901	0.2487	0.00123	0.689147	0.549968	0.86355	0.2433	0.3193	0.0393	-0.3079	0.1494	0.734989	0.548414	0.985037		a	p	3.868e-05	+++	3.4	0.1262	1.21022	1.10501	1.32544	NA	NA	NA	NA	NA	NA	0.2381	0.325	2.43e-10	0.61254	0.526306	0.712903	NA	NA	NA	NA
AA_DQA1_53_32717209_R	32717209	P	A	0.3717	0.3838	0.316	0.959301	0.996633	1.04043	0.3208	0.3471	0.211	0.882232	0.725064	1.07347	0.2172	0.3126	0.000358	-0.5499	0.154	0.577008	0.426672	0.780313		a	p	0.02606	+++	61.4	0.005595	1.08622	1.01003	1.16814	NA	NA	NA	NA	NA	NA	0.2761	0.3309	0.028	0.848007	0.73203	0.982358	NA	NA	NA	NA
AA_DQA1_54_32717212	32717212	L	F	0.0865	0.0656	1.9e-06	1.42719	1.05344	1.65213	0.1195	0.1134	0.114	1.27214	0.943646	1.71498	0.0226	0.0361	0.168	-0.55	0.3986	0.57695	0.264145	1.26018		f	l	2.94e-06	--+	23.6	0.07294	0.734107	0.644903	0.835651	NA	NA	NA	NA	NA	NA	0.0376	0.0425	0.809	0.956994	0.670437	1.36603	NA	NA	NA	NA
AA_DQA1_55_32717215	32717215	G	R	0.4705	0.4406	0.00366	1.12362	1.00921	1.21552	0.4896	0.4047	6.16e-05	1.48293	1.22296	1.79816	0.5396	0.3683	1.39e-06	0.6538	0.1355	1.92283	1.47435	2.50774	99	g	r	9.825e-08	+++	79.4	6.215e-05	1.21034	1.12832	1.29832	NA	NA	NA	NA	NA	NA	0.4859	0.3451	9.36e-15	1.73977	1.51235	2.00139	NA	NA	NA	NA
AA_DQA1_56_32717218_G	32717218	P	A	0.4705	0.4405	0.00368	1.12354	1.0092	1.21543	0.4896	0.4047	6.16e-05	1.4829	1.22293	1.79813	0.5395	0.3682	1.37e-06	0.6544	0.1355	1.92399	1.47524	2.50924		a	p	9.862e-08	---	79.4	6.101e-05	0.826215	0.770229	0.886271	NA	NA	NA	NA	NA	NA	0.4859	0.345	9.31e-15	1.73983	1.51241	2.00145	NA	NA	NA	NA
AA_DQA1_56_32717218_R	32717218	P	A	0.2852	0.3182	0.000239	0.84977	0.985962	0.92687	0.2015	0.234	0.00952	0.741856	0.591915	0.929779	0.1947	0.2767	0.00166	-0.4957	0.1576	0.609144	0.447269	0.829606		a	p	5.301e-07	+++	19.3	0.08383	1.22214	1.12998	1.32181	NA	NA	NA	NA	NA	NA	0.2386	0.2889	0.0289	0.844791	0.726183	0.982773	NA	NA	NA	NA
AA_DQA1_56_32717218_x	32717218	P	A	0.2443	0.2412	0.573	1.02647	1.00238	1.12407	0.3094	0.3618	0.0559	0.821273	0.671138	1.00499	0.2658	0.3553	0.0137	-0.3535	0.1434	0.702226	0.530167	0.930125		a	p	0.3391	-++	56.2	0.01038	1.03956	0.960232	1.12545	NA	NA	NA	NA	NA	NA	0.2756	0.367	7.14e-10	0.63332	0.547688	0.732341	NA	NA	NA	NA
AA_DQA1_61_32717233	32717233	G	F	0.4705	0.4406	0.00367	1.12358	1.0092	1.21548	0.4896	0.4047	6.16e-05	1.4829	1.22293	1.79813	0.5395	0.3682	1.37e-06	0.6544	0.1355	1.92399	1.47524	2.50924	99	g	f	9.814e-08	+++	79.4	6.113e-05	1.21034	1.12832	1.29832	NA	NA	NA	NA	NA	NA	0.4859	0.345	9.31e-15	1.73985	1.51242	2.00147	NA	NA	NA	NA
AA_DQA1_64_32717242	32717242	R	T	0.4705	0.4406	0.00367	1.12358	1.0092	1.21548	0.4896	0.4047	6.16e-05	1.4829	1.22293	1.79813	0.5395	0.3682	1.37e-06	0.6544	0.1355	1.92399	1.47524	2.50924		t	r	9.814e-08	---	79.4	6.113e-05	0.826215	0.770229	0.886271	NA	NA	NA	NA	NA	NA	0.4859	0.345	9.31e-15	1.73985	1.51242	2.00147	NA	NA	NA	NA
AA_DQA1_66_32717248	32717248	M	I	0.4705	0.4406	0.00367	1.12358	1.0092	1.21548	0.4896	0.4047	6.16e-05	1.4829	1.22293	1.79813	0.5395	0.3682	1.37e-06	0.6544	0.1355	1.92399	1.47524	2.50924		i	m	9.814e-08	---	79.4	6.113e-05	0.826215	0.770229	0.886271	NA	NA	NA	NA	NA	NA	0.4859	0.345	9.31e-15	1.73985	1.51242	2.00147	NA	NA	NA	NA
AA_DQA1_69_32717257_A	32717257	P	A	0.4705	0.4405	0.00368	1.12356	1.0092	1.21545	0.4896	0.4047	6.16e-05	1.4829	1.22293	1.79813	0.5395	0.3682	1.37e-06	0.6544	0.1355	1.92399	1.47524	2.50924		a	p	9.838e-08	---	79.4	6.107e-05	0.826215	0.770229	0.886271	NA	NA	NA	NA	NA	NA	0.4859	0.345	9.31e-15	1.73985	1.51242	2.00147	NA	NA	NA	NA
AA_DQA1_69_32717257_L	32717257	P	A	0.4722	0.5026	0.00356	0.889443	0.990811	0.962359	0.4492	0.5103	0.00534	0.763303	0.631194	0.923062	0.3876	0.5069	0.0009	-0.4466	0.1345	0.6398	0.491536	0.832785		a	p	6.568e-06	+++	42.6	0.03074	1.17504	1.09541	1.26045	NA	NA	NA	NA	NA	NA	0.422	0.5477	8.45e-10	0.647297	0.563337	0.743771	NA	NA	NA	NA
AA_DQA1_69_32717257_T	32717257	P	A	0.0574	0.0569	0.973	1.00288	1.00048	1.18611	0.0617	0.0855	0.0288	0.675434	0.475105	0.960232	0.0729	0.1251	0.00582	-0.6264	0.2271	0.534513	0.342489	0.834198		a	p	0.07999	-++	57.1	0.009452	1.13667	0.984746	1.31203	NA	NA	NA	NA	NA	NA	0.0922	0.1082	0.0036	0.714187	0.569376	0.895828	NA	NA	NA	NA
AA_DQA1_75_32717275	32717275	S	I	0.1005	0.1187	0.00259	0.822358	0.975425	0.933928	0.1286	0.1635	0.029	0.742895	0.568842	0.970205	0.1704	0.1944	0.805	-0.04339	0.17526	0.957538	0.679159	1.35002		i	s	0.0003875	+++	0	0.5195	1.21799	1.09223	1.35822	NA	NA	NA	NA	NA	NA	0.146	0.2172	1.49e-07	0.620707	0.519552	0.741556	NA	NA	NA	NA
AA_DQA1_76_32717278_L	32717278	P	A	0.2443	0.2412	0.573	1.02645	1.00237	1.12405	0.3094	0.3618	0.0559	0.821273	0.671138	1.00499	0.2658	0.3553	0.0137	-0.3535	0.1434	0.702226	0.530167	0.930125		a	p	0.3389	-++	56.2	0.01039	1.03956	0.960232	1.12545	NA	NA	NA	NA	NA	NA	0.2756	0.367	7.14e-10	0.633317	0.547685	0.732338	NA	NA	NA	NA
AA_DQA1_76_32717278_M	32717278	P	A	0.4705	0.4406	0.00367	1.12358	1.0092	1.21548	0.4896	0.4047	6.16e-05	1.4829	1.22293	1.79813	0.5396	0.3683	1.39e-06	0.6538	0.1355	1.92283	1.47435	2.50774		a	p	9.878e-08	---	79.4	6.206e-05	0.826215	0.770229	0.886271	NA	NA	NA	NA	NA	NA	0.4859	0.345	9.3e-15	1.73986	1.51243	2.00149	NA	NA	NA	NA
AA_DQA1_76_32717278_V	32717278	P	A	0.2852	0.3182	0.000238	0.84971	0.985956	0.926805	0.2015	0.234	0.00951	0.741856	0.591915	0.929779	0.1946	0.2766	0.00168	-0.4951	0.1576	0.60951	0.447537	0.830104		a	p	5.289e-07	+++	19	0.08454	1.22214	1.12998	1.32181	NA	NA	NA	NA	NA	NA	0.2386	0.2889	0.0289	0.844815	0.726203	0.9828	NA	NA	NA	NA
AA_DQA1_80_32717290	32717290	Y	S	0.4705	0.4406	0.00367	1.12357	1.0092	1.21546	0.4896	0.4047	6.16e-05	1.48293	1.22296	1.79816	0.5396	0.3683	1.39e-06	0.6538	0.1355	1.92283	1.47435	2.50774		s	y	9.886e-08	---	79.4	6.2e-05	0.826215	0.770229	0.886271	NA	NA	NA	NA	NA	NA	0.4859	0.345	9.3e-15	1.73986	1.51243	2.00149	NA	NA	NA	NA
AA_DQB1_-10_32742295_A	32742295	A	P	0.1356	0.1324	0.142	1.09367	1.01076	1.2325	0.1725	0.1631	0.297	1.14958	0.884918	1.49341	0.1129	0.123	0.868	-0.03713	0.22353	0.963551	0.62173	1.4933	99	a	p	0.09343	++-	0	0.7944	1.0945	0.984966	1.21622	0.0371797	0.0645579	1.16e-05	0.536231	0.400476	0.718005	0.1209	0.1267	0.926	0.990259	0.806305	1.21618	0.02671	0.09866	3.55e-10	3.852
AA_DQB1_-10_32742295_S	32742295	P	A	0.1068	0.0796	1.49e-08	1.47465	1.05361	1.68684	0.1557	0.1411	0.104	1.2547	0.954358	1.64957	0.1109	0.1217	0.75	-0.07156	0.22482	0.93094	0.599172	1.44641		a	p	3.601e-08	--+	10.3	0.1076	0.721012	0.641771	0.810036	NA	NA	NA	NA	NA	NA	0.1096	0.1218	0.292	0.892761	0.72297	1.10243	0.001068	0.00139	0.613	1.787
AA_DQB1_116_32737940_I	32737940	P	A	0.1494	0.1601	0.0533	0.89831	0.988402	1.00154	0.1587	0.144	0.489	1.09797	0.84272	1.43052	0.3	0.2239	0.00552	0.4397	0.1585	1.55224	1.13774	2.11776		a	p	0.5518	+--	65.4	0.003097	1.02953	0.935618	1.13286	0.106688	0.114994	0.294	0.906543	0.754238	1.0896	0.2485	0.1484	1.11e-06	1.54618	1.29753	1.84248	0.1079	0.122	0.21	1.163
AA_DQB1_116_32737940_V	32737940	A	P	0.1496	0.1603	0.0549	0.89893	0.988476	1.00223	0.1588	0.1441	0.488	1.09823	0.842906	1.43089	0.3001	0.224	0.0055	0.4399	0.1585	1.55255	1.13796	2.11819	99	a	p	0.5598	-++	65.3	0.003135	0.971902	0.883249	1.06945	0.107625	0.116262	0.282	0.905226	0.754307	1.08634	0.2486	0.1485	1.07e-06	1.5472	1.29837	1.84372	0.1079	0.122	0.21	1.163
AA_DQB1_125_32737913_A	32737913	A	P	0.4686	0.4397	0.00489	1.12	1.00899	1.21198	0.4746	0.3977	0.000204	1.45049	1.19209	1.7649	0.4985	0.3526	8.74e-06	0.6353	0.1429	1.88759	1.42649	2.49773	99	a	p	5.974e-07	+++	75.9	0.0002526	1.1977	1.11588	1.28551	0.440541	0.466161	0.033	0.878725	0.780114	0.9898	0.455	0.326	2.9e-14	1.76	1.52131	2.03613	0.4872	0.4836	0.863	0.987
AA_DQB1_125_32737913_G	32737913	P	A	0.319	0.2794	2.8e-06	1.22845	1.01787	1.33885	0.3161	0.254	0.000382	1.48157	1.19259	1.84056	0.1984	0.129	0.00676	0.5168	0.1908	1.67665	1.15354	2.437		a	p	1.021e-09	---	13.4	0.09941	0.783723	0.724768	0.847473	0.332874	0.34985	0.138	0.910838	0.804771	1.03088	0.2061	0.1777	5.89e-06	1.52236	1.26927	1.82591	0.3803	0.3615	0.279	0.918
AA_DQB1_125_32737913_S	32737913	P	A	0.1494	0.1601	0.0533	0.898283	0.988399	1.00151	0.1587	0.144	0.489	1.09799	0.84277	1.4305	0.3001	0.224	0.0055	0.4399	0.1585	1.55255	1.13796	2.11819		a	p	0.5519	+--	65.4	0.003082	1.02953	0.935618	1.13286	0.10654	0.114779	0.296	0.906875	0.754301	1.09031	0.2485	0.1484	1.11e-06	1.54614	1.2975	1.84243	0.1079	0.122	0.21	1.163
AA_DQB1_13_32740798	32740798	A	G	0.2281	0.2351	0.284	0.950383	0.995274	1.04309	0.218	0.2957	1.43e-05	0.613853	0.492382	0.76529	0.2985	0.2925	0.87	0.02411	0.14674	1.0244	0.768357	1.36577	99	a	g	0.01188	--+	70.7	0.00108	0.899874	0.828926	0.976895	0.276566	0.326781	0.000304	0.790994	0.695775	0.899244	0.2765	0.3493	5.28e-07	0.687757	0.594173	0.796081	0.3162	0.2992	0.502	0.947
AA_DQB1_130_32737898_Q	32737898	P	A	0.0593	0.0921	5.48e-07	0.660849	0.935061	0.777137	0.0309	0.0343	0.273	0.748563	0.446177	1.25588	0.0088	0.0281	0.0444	-1.1476	0.5709	0.317398	0.103668	0.97177		a	p	9.562e-08	+++	0	0.3922	1.51755	1.3019	1.76892	0.0329937	0.0647608	2.92e-07	0.47907	0.355243	0.646059	0.0276	0.0292	0.327	1.22006	0.81991	1.81549	0.03098	0.1024	1.06e-09	3.41
AA_DQB1_130_32737898_R	32737898	A	P	0.0594	0.0922	5.71e-07	0.661305	0.935173	0.777659	0.031	0.0343	0.274	0.748937	0.4464	1.25651	0.0089	0.0282	0.0444	-1.1476	0.5709	0.317398	0.103668	0.97177	99	a	p	9.986e-08	---	0	0.3918	0.659416	0.565711	0.768644	0.034116	0.0663352	1.96e-07	0.473153	0.350504	0.638721	0.0277	0.0293	0.321	1.22273	0.821655	1.81959	0.03098	0.1024	1.06e-09	3.41
AA_DQB1_14_32740795	32740795	L	M	0.1494	0.1599	0.0578	0.900045	0.988608	1.0035	0.1584	0.1423	0.448	1.10827	0.849945	1.44511	0.3	0.2232	0.00538	0.441	0.1584	1.55426	1.13944	2.1201	99	l	m	0.5912	-++	65.6	0.00297	0.97414	0.885109	1.07213	0.107583	0.116384	0.275	0.903931	0.753434	1.08449	0.2485	0.1486	1.26e-06	1.54263	1.29457	1.83823	0.1132	0.1218	0.41	1.103
AA_DQB1_140_32737868_A	32737868	A	P	0.4247	0.4807	2.41e-09	0.783574	0.980653	0.848925	0.3703	0.4611	1.77e-06	0.617609	0.506787	0.752664	0.3908	0.5262	1.37e-05	-0.6322	0.1454	0.531421	0.399643	0.706653	99	a	p	2.755e-16	---	61.4	0.005643	0.740818	0.689401	0.79607	0.556464	0.531753	0.0373	1.13519	1.00733	1.27928	0.4384	0.5558	1.59e-11	0.616387	0.535469	0.709532	0.4893	0.4849	0.851	0.986
AA_DQB1_140_32737868_T	32737868	P	A	0.4246	0.4807	2.36e-09	0.783472	0.980643	0.848814	0.3702	0.4611	1.74e-06	0.6173	0.506534	0.752288	0.3907	0.5261	1.35e-05	-0.6327	0.1454	0.531156	0.399443	0.706299		a	p	2.632e-16	+++	61.5	0.005573	1.35013	1.25642	1.45082	0.555641	0.530809	0.037	1.1352	1.00747	1.27912	0.4372	0.5545	1.58e-11	0.617244	0.536448	0.710208	0.4893	0.4849	0.851	0.986
AA_DQB1_167_32737787_H	32737787	P	A	0.2282	0.2352	0.281	0.950108	0.995248	1.04277	0.2171	0.2929	2.89e-05	0.625315	0.501773	0.779274	0.2982	0.2915	0.794	0.03816	0.14609	1.0389	0.780222	1.38333		a	p	0.01485	++-	68.7	0.001682	1.10749	1.02018	1.20229	0.27665	0.327295	0.000257	0.788694	0.693693	0.896704	0.28	0.3543	9.39e-07	0.693984	0.599709	0.803079	0.328	0.2992	0.175	0.895
AA_DQB1_167_32737787_R	32737787	A	P	0.2283	0.2353	0.283	0.950307	0.995269	1.04297	0.2171	0.2929	2.92e-05	0.625502	0.501923	0.779508	0.2982	0.2915	0.794	0.03815	0.14609	1.03889	0.780214	1.38332	99	a	p	0.01506	--+	68.7	0.001689	0.90321	0.831999	0.980516	0.277369	0.327779	0.00028	0.789784	0.694649	0.897948	0.2817	0.356	1.24e-06	0.697699	0.603234	0.806956	0.3269	0.2992	0.193	0.899
AA_DQB1_-17_32742316_A	32742316	A	P	0.1414	0.1462	0.666	0.975788	0.99728	1.09048	0.0882	0.0972	0.172	0.786707	0.55773	1.10969	0.1268	0.0651	0.00137	0.8246	0.2576	2.28097	1.37672	3.77914	99	a	p	0.8747	--+	67.4	0.002158	0.991734	0.894234	1.09987	0.199494	0.269365	3.08e-08	0.677014	0.588104	0.779366	0.1183	0.1039	0.00909	1.35119	1.07772	1.69404	0.2244	0.286	0.000518	1.363
AA_DQB1_-17_32742316_P	32742316	P	A	0.1125	0.0934	0.002	1.2181	1.025	1.38049	0.0714	0.0753	0.423	0.855987	0.585121	1.25224	0.1247	0.0639	0.0023	0.784	0.2571	2.19022	1.32324	3.62522		a	p	0.0009221	-+-	53	0.01419	0.822341	0.732538	0.923153	0.167261	0.20883	0.000445	0.766239	0.659116	0.890773	0.1069	0.099	0.0976	1.21851	0.964419	1.53954	0.1987	0.1887	0.565	0.946
AA_DQB1_-18_32742319_A	32742319	P	A	0.3348	0.3146	0.0185	1.10446	1.00825	1.19968	0.3736	0.4367	0.00437	0.751864	0.61792	0.914842	0.4091	0.4132	0.997	-0.0005105	0.1389	0.99949	0.76128	1.31224		a	p	0.3062	-++	68.3	0.001821	0.962424	0.894398	1.03562	0.279311	0.328846	0.000355	0.793177	0.697759	0.901642	0.3859	0.4708	9.28e-08	0.688473	0.600328	0.78956	0.328	0.3006	0.209	0.903
AA_DQB1_-18_32742319_V	32742319	A	P	0.3636	0.3674	0.97	1.00159	1.00013	1.08681	0.3904	0.4586	0.00133	0.725612	0.596544	0.882605	0.4112	0.4145	0.93	0.01218	0.13902	1.01225	0.770821	1.32931	99	a	p	0.2571	+-+	55.7	0.01096	0.95887	0.891619	1.03119	0.312457	0.390344	3.2e-08	0.70551	0.622525	0.799558	0.3973	0.4757	2.06e-06	0.717706	0.625856	0.823036	0.3536	0.3979	0.0144	1.213
AA_DQB1_182_32737742_N	32737742	P	A	0.4245	0.4806	2.33e-09	0.783401	0.980635	0.848738	0.3704	0.4611	1.88e-06	0.61835	0.507495	0.75342	0.3908	0.5261	1.37e-05	-0.6322	0.1454	0.531421	0.399643	0.706653		a	p	2.69e-16	+++	61.2	0.005789	1.34999	1.2563	1.45068	0.556009	0.531388	0.0393	1.13346	1.00598	1.2771	0.4378	0.5551	1.67e-11	0.617014	0.536095	0.710148	0.4904	0.4849	0.808	0.982
AA_DQB1_182_32737742_S	32737742	A	P	0.4247	0.4807	2.43e-09	0.783613	0.980657	0.848967	0.3704	0.4611	1.89e-06	0.618474	0.507597	0.753571	0.3908	0.5262	1.37e-05	-0.6322	0.1454	0.531421	0.399643	0.706653	99	a	p	2.843e-16	---	61.2	0.005757	0.740966	0.689539	0.796229	0.556443	0.531683	0.0382	1.1342	1.00668	1.27787	0.4381	0.5553	1.64e-11	0.616763	0.535842	0.709906	0.4904	0.4849	0.808	0.982
AA_DQB1_185_32737733_I	32737733	P	A	0.3092	0.339	0.000807	0.864253	0.987627	0.941245	0.225	0.244	0.109	0.834185	0.66859	1.04079	0.2173	0.2985	0.00217	-0.4737	0.1545	0.622694	0.460004	0.842923		a	p	1.289e-05	+++	4.3	0.1237	1.18697	1.09897	1.28201	0.446786	0.412923	0.00737	1.17736	1.04478	1.32675	0.2695	0.3047	0.255	0.916556	0.788744	1.06508	0.4038	0.4048	0.861	0.987
AA_DQB1_185_32737733_T	32737733	A	P	0.3094	0.3391	0.000818	0.864391	0.987638	0.941414	0.2253	0.2441	0.111	0.835103	0.669326	1.04194	0.2175	0.2986	0.0022	-0.4734	0.1546	0.622881	0.460052	0.843341	99	a	p	1.34e-05	---	4.1	0.1243	0.842737	0.78026	0.910217	0.447449	0.413517	0.00723	1.17769	1.04514	1.32706	0.27	0.3051	0.254	0.916324	0.788455	1.06493	0.4038	0.4048	0.861	0.987
AA_DQB1_197_32737188_N	32737188	P	A	0.1127	0.0935	0.00191	1.21923	1.02512	1.38177	0.0717	0.0758	0.42	0.855217	0.584595	1.25112	0.1247	0.0639	0.00231	0.7836	0.2571	2.18934	1.32271	3.62377		a	p	0.0008843	-+-	53.1	0.01412	0.821766	0.732025	0.922507	0.167051	0.208605	0.000474	0.767402	0.660221	0.891982	0.1069	0.0991	0.1	1.21666	0.963037	1.53707	0.2201	0.189	0.0499	0.833
AA_DQB1_197_32737188_S	32737188	A	P	0.1129	0.0936	0.00182	1.22019	1.02521	1.38284	0.0718	0.0759	0.424	0.856244	0.585412	1.25237	0.125	0.0641	0.00226	0.7843	0.2569	2.19087	1.32416	3.62489	99	a	p	0.0008381	+-+	53.1	0.0141	1.21787	1.08487	1.36717	0.168039	0.209378	0.000505	0.768186	0.660797	0.893027	0.1075	0.0996	0.1	1.21656	0.963137	1.53667	0.2212	0.189	0.0428	0.828
AA_DQB1_203_32737170_I	32737170	A	P	0.3561	0.3463	0.336	1.04105	1.0033	1.12995	0.4036	0.3228	2.7e-05	1.53465	1.25656	1.87427	0.3745	0.2891	0.0059	0.3918	0.1423	1.47964	1.11951	1.95562	99	a	p	0.001819	+++	75.6	0.0002726	1.12345	1.04424	1.20865	0.273597	0.257667	0.431	1.05456	0.924053	1.20351	0.3482	0.2277	3.89e-12	1.72449	1.47854	2.01136	0.2703	0.2946	0.175	1.123
AA_DQB1_203_32737170_V	32737170	P	A	0.3559	0.3462	0.34	1.04071	1.00328	1.12958	0.4034	0.3226	2.75e-05	1.53403	1.25606	1.87352	0.3743	0.2889	0.00595	0.3913	0.1423	1.4789	1.11895	1.95464		a	p	0.001878	---	75.6	0.0002738	0.890386	0.827614	0.957919	0.2726	0.256897	0.444	1.05293	0.922816	1.20138	0.3478	0.2273	3.96e-12	1.72412	1.47823	2.01091	0.2703	0.2946	0.175	1.123
AA_DQB1_-21_32742328_D	32742328	P	A	0.3273	0.2934	0.000754	1.15488	1.01214	1.2558	0.3882	0.2993	1.94e-06	1.63444	1.33513	2.00085	0.3712	0.2884	0.00886	0.3728	0.1425	1.45179	1.09801	1.91957		a	p	4.93e-08	---	64	0.003857	0.812613	0.754141	0.875619	0.241257	0.197278	0.00124	1.2652	1.09745	1.4586	0.3364	0.2226	2.56e-10	1.64686	1.41092	1.92226	0.265	0.1975	4.78e-05	0.698
AA_DQB1_-21_32742328_G	32742328	A	P	0.3561	0.3462	0.325	1.04198	1.00337	1.13089	0.405	0.3213	1.41e-05	1.55737	1.27517	1.90203	0.3732	0.2898	0.007	0.3835	0.1422	1.46741	1.11048	1.93908	99	a	p	0.001498	+++	76.5	0.000201	1.12581	1.04644	1.2112	0.274713	0.258692	0.433	1.05439	0.923696	1.20357	0.3478	0.2275	4.82e-12	1.72018	1.47489	2.00625	0.2906	0.2948	0.85	1.016
AA_DQB1_220_32737119_H	32737119	A	P	0.4687	0.4397	0.00482	1.12018	1.009	1.21215	0.4749	0.3979	0.000202	1.45078	1.19232	1.76526	0.4993	0.3528	8.02e-06	0.638	0.1429	1.89269	1.43035	2.50449	99	a	p	5.692e-07	+++	76	0.0002383	1.19806	1.11622	1.2859	0.440877	0.466466	0.0341	0.879506	0.78085	0.990627	0.4551	0.3264	3.8e-14	1.75516	1.51719	2.03045	0.4872	0.4836	0.863	0.987
AA_DQB1_220_32737119_R	32737119	P	A	0.4686	0.4396	0.00488	1.12	1.00898	1.21196	0.4747	0.3978	0.000205	1.45049	1.19185	1.76525	0.499	0.3526	8.07e-06	0.6379	0.1429	1.8925	1.4302	2.50424		a	p	5.887e-07	---	76	0.000239	0.834853	0.777823	0.896063	0.439651	0.4655	0.0329	0.879056	0.780721	0.989777	0.4547	0.326	3.78e-14	1.75546	1.5174	2.03087	0.4872	0.4836	0.863	0.987
AA_DQB1_221_32737116_H	32737116	A	P	0.4687	0.4397	0.00482	1.12018	1.009	1.21215	0.4748	0.3979	0.000203	1.45063	1.1922	1.76508	0.4993	0.3528	8.02e-06	0.638	0.1429	1.89269	1.43035	2.50449	99	a	p	5.703e-07	+++	76	0.0002388	1.19806	1.11622	1.2859	0.44082	0.466607	0.0337	0.879241	0.780636	0.9903	0.4551	0.3265	3.89e-14	1.75477	1.51685	2.03	0.4893	0.4836	0.778	0.979
AA_DQB1_221_32737116_Q	32737116	P	A	0.4686	0.4396	0.00489	1.11997	1.00898	1.21192	0.4742	0.3971	0.0002	1.45194	1.19281	1.76736	0.499	0.3526	8.07e-06	0.6378	0.1429	1.89231	1.43006	2.50399		a	p	5.865e-07	---	76.1	0.0002356	0.834769	0.777745	0.895974	0.439651	0.4655	0.0329	0.879056	0.780721	0.989777	0.4546	0.326	3.82e-14	1.75532	1.51727	2.03072	0.4872	0.4836	0.863	0.987
AA_DQB1_224_32737107_Q	32737107	A	P	0.1494	0.1602	0.0518	0.89769	0.98833	1.00083	0.159	0.1445	0.488	1.09812	0.842822	1.43075	0.3002	0.2239	0.00535	0.442	0.1587	1.55582	1.13991	2.12347	99	a	p	0.5459	-++	65.7	0.002944	0.970931	0.882366	1.06838	0.108598	0.117147	0.288	0.906386	0.755439	1.0875	0.2487	0.1488	1.16e-06	1.54521	1.2966	1.84148	0.1079	0.122	0.21	1.163
AA_DQB1_224_32737107_R	32737107	P	A	0.1493	0.1601	0.0511	0.897385	0.988291	1.00051	0.1588	0.1443	0.491	1.09751	0.8423	1.43003	0.3	0.2237	0.00543	0.441	0.1586	1.55426	1.13899	2.12093		a	p	0.5411	+--	65.6	0.00297	1.03035	0.936367	1.13377	0.10764	0.116407	0.276	0.904275	0.753773	1.08483	0.2484	0.1485	1.17e-06	1.54483	1.29631	1.84099	0.1079	0.122	0.21	1.163
AA_DQB1_23_32740768	32740768	L	R	0.0695	0.0837	0.00716	0.807155	0.967099	0.943568	0.0315	0.0329	0.762	0.919808	0.534883	1.58174	0.0279	0.0539	0.118	-0.5626	0.3594	0.569726	0.281669	1.15237	99	l	r	0.003333	---	0	0.5607	0.802679	0.693084	0.929605	0.0979727	0.127402	0.00423	0.759406	0.627089	0.919642	0.0488	0.0682	0.0147	0.697588	0.522357	0.931603	0.09615	0.1146	0.167	1.185
AA_DQB1_26_32740759_G	32740759	P	A	0.2523	0.2715	0.0115	0.890707	0.989662	0.974381	0.2103	0.1879	0.385	1.11216	0.874765	1.41397	0.3435	0.2984	0.0646	0.2736	0.1481	1.31469	0.983462	1.75747		a	p	0.1424	+--	52.4	0.01502	1.06237	0.979952	1.15171	0.257115	0.285898	0.0259	0.862149	0.756204	0.982938	0.3178	0.2278	0.00019	1.33962	1.1489	1.56198	0.2457	0.2807	0.0305	1.206
AA_DQB1_26_32740759_L	32740759	P	A	0.5197	0.4935	0.00145	1.13777	1.0103	1.23182	0.5713	0.5162	0.00177	1.35175	1.11902	1.63288	0.3582	0.4099	0.047	-0.2834	0.1427	0.753218	0.569446	0.996299		a	p	0.0004483	--+	65.4	0.003109	0.88091	0.820734	0.945498	0.465564	0.386531	7.55e-08	1.381	1.22725	1.55401	0.4057	0.4233	0.158	1.10596	0.961759	1.27178	0.4402	0.4201	0.145	0.894
AA_DQB1_26_32740759_Y	32740759	P	A	0.2281	0.2351	0.281	0.950117	0.995246	1.04284	0.2187	0.2962	1.71e-05	0.616683	0.494749	0.768668	0.2984	0.2921	0.854	0.02711	0.14687	1.02748	0.77047	1.37023		a	p	0.01232	++-	70.2	0.001215	1.11071	1.02314	1.20578	0.276606	0.326795	0.000306	0.7911	0.695869	0.899363	0.2765	0.3493	5.24e-07	0.687708	0.594135	0.796018	0.3162	0.2992	0.502	0.947
AA_DQB1_-27_32742346_A	32742346	A	P	0.1782	0.2127	1e-05	0.797024	0.977416	0.881452	0.175	0.1635	0.808	1.03207	0.800558	1.33054	0.3019	0.2241	0.00384	0.4577	0.1583	1.58043	1.15885	2.15538	99	a	p	0.002615	-++	78.8	8.005e-05	0.871447	0.796784	0.953107	0.140237	0.177401	0.000368	0.750942	0.63989	0.881266	0.2598	0.1534	3.99e-08	1.62196	1.36481	1.92757	0.1378	0.2191	3.31e-07	1.716
AA_DQB1_-27_32742346_S	32742346	P	A	0.1493	0.1599	0.0556	0.899182	0.988502	1.00255	0.1582	0.142	0.448	1.10827	0.849778	1.44539	0.2999	0.2229	0.00525	0.4422	0.1584	1.55613	1.14081	2.12265		a	p	0.5824	+--	65.9	0.002837	1.02727	0.933379	1.13059	0.107582	0.116383	0.275	0.903931	0.753434	1.08449	0.2484	0.1485	1.28e-06	1.54205	1.29408	1.83752	0.1122	0.1218	0.364	1.114
AA_DQB1_28_32740753	32740753	S	T	0.1068	0.0796	1.49e-08	1.47463	1.0536	1.68682	0.1558	0.1411	0.103	1.25533	0.954836	1.6504	0.1109	0.1218	0.748	-0.07229	0.22475	0.930261	0.598817	1.44516		t	s	3.594e-08	--+	10.5	0.1072	0.721012	0.641771	0.810036	NA	NA	NA	NA	NA	NA	0.1096	0.1218	0.291	0.892556	0.722831	1.10213	0.002137	0.00139	0.861	0.859
AA_DQB1_3_32742259_P	32742259	P	A	0.1126	0.0934	0.00199	1.21832	1.02502	1.38076	0.0714	0.0753	0.424	0.85633	0.585355	1.25274	0.1247	0.0639	0.00229	0.7841	0.2571	2.19043	1.32337	3.62559		a	p	0.0009127	-+-	53	0.01423	0.822177	0.732392	0.922969	0.16782	0.209192	0.000469	0.76709	0.659872	0.89173	0.1069	0.099	0.0973	1.21873	0.96459	1.53982	0.2094	0.189	0.217	0.89
AA_DQB1_3_32742259_S	32742259	A	P	0.113	0.0937	0.00179	1.22065	1.02527	1.38337	0.0719	0.0756	0.432	0.858559	0.586879	1.256	0.125	0.0647	0.00242	0.7792	0.2568	2.17973	1.31768	3.60574	99	a	p	0.0008218	+-+	52.3	0.01512	1.21835	1.0853	1.36771	0.169236	0.210175	0.000513	0.768323	0.660877	0.893238	0.1071	0.0992	0.0989	1.21762	0.963698	1.53846	0.2094	0.189	0.217	0.89
AA_DQB1_30_32740747_H	32740747	P	A	0.1976	0.2305	4.85e-05	0.81779	0.98067	0.901126	0.1923	0.1818	0.592	1.06957	0.836553	1.3675	0.3035	0.2246	0.00359	0.4608	0.1583	1.58534	1.16245	2.16207		a	p	0.008636	+--	78.2	0.0001025	1.12311	1.02991	1.22474	0.143419	0.182219	0.000215	0.745727	0.636829	0.873245	0.2636	0.16	8.14e-08	1.59605	1.34541	1.89339	0.1389	0.2256	7.91e-08	1.763
AA_DQB1_30_32740747_S	32740747	P	A	0.1068	0.0796	1.49e-08	1.47465	1.05361	1.68684	0.1558	0.1411	0.103	1.25533	0.954836	1.6504	0.1109	0.1218	0.748	-0.07229	0.22475	0.930261	0.598817	1.44516		a	p	3.591e-08	--+	10.5	0.1071	0.721012	0.641771	0.810036	NA	NA	NA	NA	NA	NA	0.1096	0.1218	0.291	0.892556	0.722831	1.10213	0.002137	0.00139	0.861	0.859
AA_DQB1_30_32740747_Y	32740747	A	P	0.3043	0.3101	0.772	0.98742	0.998916	1.0757	0.348	0.323	0.0991	1.18768	0.968092	1.45707	0.4143	0.3461	0.0153	0.3407	0.1404	1.40593	1.06771	1.85129	99	a	p	0.3054	-++	47.7	0.02191	1.0405	0.964494	1.12249	0.147309	0.185145	0.000292	0.750458	0.641003	0.878603	0.3731	0.2816	8.24e-05	1.33589	1.15655	1.54303	0.14	0.227	6.55e-08	1.767
AA_DQB1_37_32740726_D	32740726	P	A	0.1126	0.0935	0.002	1.21809	1.02499	1.38045	0.0715	0.0754	0.423	0.855901	0.585063	1.25212	0.1247	0.064	0.00234	0.7824	0.2571	2.18671	1.32113	3.61943		a	p	0.0009264	-+-	52.9	0.01438	0.822423	0.732611	0.923246	0.168253	0.209746	0.000446	0.7661	0.658921	0.890714	0.107	0.099	0.0974	1.21867	0.964551	1.53973	0.2094	0.189	0.217	0.89
AA_DQB1_37_32740726_I	32740726	P	A	0.1068	0.0796	1.49e-08	1.47465	1.05361	1.68684	0.1558	0.1412	0.104	1.2547	0.954171	1.6499	0.1109	0.1219	0.747	-0.07265	0.22471	0.929926	0.598648	1.44453		a	p	3.639e-08	--+	10.7	0.1065	0.721084	0.641835	0.810117	NA	NA	NA	NA	NA	NA	0.1096	0.1218	0.291	0.892567	0.72284	1.10215	0.002137	0.00139	0.861	0.859
AA_DQB1_37_32740726_Y	32740726	A	P	0.2194	0.1731	1.81e-10	1.36977	1.0309	1.50885	0.2271	0.2164	0.374	1.11249	0.879498	1.4072	0.2355	0.1855	0.0374	0.3771	0.1812	1.45805	1.02219	2.07976	99	a	p	5.567e-11	+++	-41.8	0.2441	1.33643	1.22552	1.45737	0.172612	0.212982	0.000679	0.774022	0.666474	0.898924	0.2165	0.2206	0.711	1.03216	0.873279	1.21995	0.2105	0.1904	0.237	0.894
AA_DQB1_38_32740723	32740723	V	A	0.3688	0.3331	0.000182	1.16676	1.01254	1.26491	0.3854	0.3588	0.197	1.13726	0.9355	1.38253	0.5354	0.4083	3.75e-05	0.5969	0.1448	1.81648	1.36765	2.41261		a	v	1.114e-06	---	55.3	0.01141	0.835772	0.777612	0.898281	0.28022	0.32939	0.000209	0.785847	0.691116	0.893562	0.465	0.3689	2.24e-05	1.34964	1.17495	1.55031	0.3173	0.3124	0.94	0.994
AA_DQB1_-4_32742277_L	32742277	P	A	0.3273	0.2934	0.000749	1.15499	1.01214	1.25591	0.3883	0.2994	1.9e-06	1.63526	1.3358	2.00185	0.3722	0.2885	0.00821	0.3763	0.1424	1.45688	1.10208	1.92592		a	p	4.635e-08	---	64.3	0.003707	0.812288	0.753839	0.875269	0.241257	0.197062	0.00111	1.26852	1.10012	1.46269	0.3363	0.2226	2.55e-10	1.64696	1.41101	1.92238	0.265	0.1975	4.78e-05	0.698
AA_DQB1_-4_32742277_V	32742277	A	P	0.3563	0.3462	0.321	1.04231	1.0034	1.13128	0.405	0.3213	1.38e-05	1.55815	1.27581	1.90298	0.3732	0.2898	0.00693	0.384	0.1422	1.46815	1.11103	1.94005	99	a	p	0.001449	+++	76.5	0.0001996	1.12614	1.04675	1.21156	0.273505	0.257595	0.437	1.05388	0.923479	1.20268	0.3477	0.2275	4.82e-12	1.72018	1.47489	2.00626	0.2906	0.2948	0.85	1.016
AA_DQB1_45_32740702	32740702	E	G	0.1156	0.1416	4.27e-05	0.775529	0.969523	0.875943	0.1473	0.2208	1.82e-05	0.579088	0.45104	0.74349	0.1738	0.2284	0.0414	-0.35534	0.17422	0.700935	0.498171	0.986227		g	e	3.36e-09	+++	7	0.1164	1.36944	1.23384	1.51994	0.108396	0.11735	0.372	0.918805	0.762465	1.1072	0.1692	0.2504	2.08e-12	0.534875	0.449241	0.636833	0.1079	0.1102	0.635	1.059
AA_DQB1_46_32740699	32740699	E	V	0.1068	0.0796	1.49e-08	1.47465	1.05361	1.68684	0.1558	0.1413	0.105	1.25445	0.953981	1.64957	0.1109	0.1219	0.747	-0.07265	0.22471	0.929926	0.598648	1.44453	99	e	v	3.652e-08	++-	10.7	0.1064	1.3868	1.23439	1.55803	NA	NA	NA	NA	NA	NA	0.1096	0.1219	0.29	0.892467	0.722769	1.10201	0.03312	0.001621	1.92e-09	0.072
AA_DQB1_47_32740696	32740696	F	Y	0.1068	0.0796	1.49e-08	1.47465	1.05361	1.68684	0.1558	0.1413	0.105	1.25445	0.953981	1.64957	0.1109	0.1219	0.747	-0.07265	0.22471	0.929926	0.598648	1.44453	99	f	y	3.652e-08	++-	10.7	0.1064	1.3868	1.23439	1.55803	NA	NA	NA	NA	NA	NA	0.1096	0.1219	0.29	0.892467	0.722769	1.10201	0.03312	0.001621	1.92e-09	0.072
AA_DQB1_-5_32742280_L	32742280	P	A	0.178	0.1335	1.43e-10	1.41745	1.0379	1.57694	0.2301	0.1574	6.24e-07	1.8554	1.45508	2.36586	0.0713	0.0657	0.871	0.04205	0.25936	1.04295	0.627322	1.73394		a	p	8.204e-15	---	30	0.05748	0.68393	0.621423	0.752724	0.133676	0.0806803	1.72e-08	1.74535	1.4403	2.11499	0.0879	0.0743	0.000649	1.54858	1.20441	1.99108	0.1528	0.07573	5.83e-11	0.465
AA_DQB1_-5_32742280_P	32742280	A	P	0.3562	0.3462	0.323	1.04215	1.00339	1.13109	0.405	0.3213	1.38e-05	1.55815	1.27581	1.90298	0.3732	0.2898	0.00693	0.384	0.1422	1.46815	1.11103	1.94005	99	a	p	0.001466	+++	76.5	0.0001981	1.12603	1.04665	1.21144	0.27352	0.257538	0.435	1.05405	0.92364	1.20286	0.3477	0.2275	4.82e-12	1.72018	1.47489	2.00626	0.2906	0.2948	0.85	1.016
AA_DQB1_-5_32742280_S	32742280	P	A	0.1493	0.1599	0.0563	0.899434	0.988533	1.00283	0.1582	0.1421	0.446	1.10871	0.850118	1.44597	0.3	0.223	0.0053	0.4418	0.1584	1.5555	1.14035	2.1218		a	p	0.5856	+--	65.8	0.00287	1.02696	0.933099	1.13026	0.107582	0.116384	0.275	0.903919	0.753424	1.08447	0.2484	0.1485	1.28e-06	1.54217	1.29419	1.83768	0.1122	0.1218	0.364	1.114
AA_DQB1_52_32740681	32740681	L	P	0.1068	0.0796	1.49e-08	1.47465	1.05361	1.68684	0.1558	0.1413	0.105	1.25445	0.953981	1.64957	0.1109	0.1219	0.747	-0.07265	0.22471	0.929926	0.598648	1.44453	99	l	p	3.652e-08	++-	10.7	0.1064	1.3868	1.23439	1.55803	NA	NA	NA	NA	NA	NA	0.1096	0.1219	0.29	0.892467	0.722769	1.10201	0.03312	0.001621	1.92e-09	0.072
AA_DQB1_53_32740678	32740678	Q	L	0.4685	0.4396	0.00488	1.11997	1.00898	1.2119	0.4757	0.3963	0.000132	1.46682	1.20528	1.78513	0.4986	0.353	9.06e-06	0.6344	0.1429	1.88589	1.42521	2.49549		l	q	4.941e-07	---	76.4	0.0002072	0.833851	0.77689	0.894989	0.440915	0.466728	0.0318	0.877878	0.779335	0.988882	0.4546	0.326	3.87e-14	1.75517	1.51713	2.03057	0.4776	0.4836	0.72	1.028
AA_DQB1_55_32740672_L	32740672	P	A	0.1068	0.0796	1.49e-08	1.47465	1.05361	1.68684	0.1558	0.1413	0.105	1.25445	0.953981	1.64957	0.1109	0.1219	0.747	-0.07265	0.2247	0.929926	0.59866	1.4445		a	p	3.652e-08	--+	10.7	0.1064	0.721084	0.641835	0.810117	NA	NA	NA	NA	NA	NA	0.1096	0.1219	0.29	0.892467	0.722769	1.10201	0.03312	0.001621	1.92e-09	0.072
AA_DQB1_55_32740672_P	32740672	P	A	0.322	0.3694	1.27e-07	0.798452	0.981382	0.867982	0.317	0.4174	2.33e-07	0.582748	0.474913	0.715069	0.3472	0.4505	0.000288	-0.5226	0.1441	0.592977	0.447072	0.786499		a	p	4.009e-14	+++	62.5	0.004848	1.33322	1.23753	1.43631	0.405435	0.360644	0.00045	1.24485	1.10148	1.40688	0.3665	0.4734	3.89e-10	0.637992	0.554228	0.734415	0.36	0.3562	0.767	0.976
AA_DQB1_55_32740672_R	32740672	P	A	0.5712	0.551	0.0509	1.0816	1.00619	1.1702	0.5276	0.4419	6.91e-05	1.49496	1.22647	1.82223	0.542	0.4283	0.000294	0.4965	0.1371	1.64296	1.25581	2.14946		a	p	3.761e-05	---	74.7	0.0003727	0.862086	0.803354	0.925112	0.59056	0.636329	0.000375	0.801622	0.709648	0.905516	0.524	0.4053	9.7e-12	1.62426	1.41265	1.86756	0.3921	0.3578	0.0474	0.854
AA_DQB1_56_32740669	32740669	L	P	0.1027	0.1114	0.176	0.915523	0.988776	1.04043	0.052	0.0459	0.754	1.07108	0.696801	1.64641	0.0435	0.0756	0.118	-0.4505	0.2885	0.637309	0.362055	1.12183	99	l	p	0.1309	-+-	-91.9	0.3528	0.911832	0.808919	1.02784	0.149557	0.169523	0.0753	0.863789	0.734329	1.01607	0.0694	0.0796	0.31	0.87643	0.679436	1.13054	0.1325	0.1586	0.0561	1.228
AA_DQB1_57_32740666_A	32740666	P	A	0.1717	0.1885	0.0319	0.892517	0.988255	0.990238	0.1776	0.1985	0.267	0.867188	0.674243	1.11535	0.1603	0.2056	0.0391	-0.3739	0.1812	0.688046	0.482366	0.981427		a	p	0.004217	+++	0	0.3862	1.14488	1.04351	1.2561	0.0889539	0.0947412	0.772	0.969888	0.788468	1.19305	0.1561	0.1975	0.0101	0.791508	0.662328	0.945884	0.09936	0.1005	0.793	1.034
AA_DQB1_57_32740666_D	32740666	A	P	0.3451	0.3987	3.15e-07	0.804825	0.982092	0.87467	0.3316	0.3386	0.906	0.987598	0.803239	1.21427	0.4477	0.4048	0.145	0.1939	0.1331	1.21397	0.935218	1.57582	99	a	p	2.947e-05	--+	63.1	0.004439	0.854021	0.793035	0.919696	0.198747	0.239056	0.000836	0.787292	0.683206	0.907236	0.3959	0.337	0.019	1.1816	1.02779	1.35842	0.2051	0.2897	8.84e-07	1.569
AA_DQB1_57_32740666_V	32740666	P	A	0.1382	0.1809	4.28e-07	0.75112	0.96875	0.839244	0.0893	0.0859	0.963	1.00806	0.71802	1.41526	0.077	0.0653	0.294	0.2685	0.2558	1.308	0.792258	2.15948		a	p	7.714e-06	+--	40	0.03574	1.26554	1.14157	1.40298	0.0779334	0.119654	1.91e-06	0.619819	0.505671	0.759736	0.1003	0.072	0.000251	1.59348	1.24175	2.04483	0.07479	0.1642	1.32e-10	2.414
AA_DQB1_-6_32742283_A	32742283	P	A	0.0695	0.0837	0.00716	0.807155	0.967099	0.943568	0.0315	0.0329	0.765	0.920627	0.535349	1.58318	0.0279	0.0538	0.119	-0.5605	0.3594	0.570924	0.282261	1.1548		a	p	0.003355	+++	0	0.5629	1.24558	1.07551	1.44254	0.0979949	0.127426	0.00423	0.759466	0.62716	0.919684	0.0488	0.0682	0.0148	0.697883	0.52257	0.932012	0.09509	0.1146	0.142	1.198
AA_DQB1_-6_32742283_S	32742283	P	A	0.3273	0.2934	0.000748	1.15499	1.01214	1.25591	0.3883	0.2994	1.9e-06	1.63526	1.3358	2.00185	0.3712	0.2885	0.00888	0.3727	0.1425	1.45165	1.0979	1.91938		a	p	4.834e-08	---	64.1	0.003821	0.812451	0.75399	0.875444	0.241257	0.197062	0.00111	1.26852	1.10012	1.46269	0.3363	0.2225	2.54e-10	1.64702	1.41106	1.92245	0.265	0.1975	4.78e-05	0.698
AA_DQB1_-6_32742283_T	32742283	A	P	0.4257	0.4299	0.631	0.980601	0.998437	1.06213	0.4365	0.3541	2.5e-05	1.53342	1.25704	1.87057	0.4011	0.3434	0.0437	0.2751	0.1364	1.31666	1.00779	1.72021	99	a	p	0.1044	-++	79.4	6.018e-05	1.06099	0.987929	1.13945	0.371551	0.384985	0.25	0.931134	0.824471	1.0516	0.3965	0.2954	8.13e-08	1.47694	1.2808	1.70312	0.3857	0.4094	0.257	1.092
AA_DQB1_66_32740639	32740639	D	E	0.3221	0.2845	6.09e-06	1.21408	1.01644	1.32056	0.2793	0.2622	0.324	1.11472	0.89835	1.38319	0.279	0.2608	0.321	0.1588	0.1601	1.1721	0.856419	1.60415	99	d	e	2.917e-06	+++	0	0.7621	1.19877	1.11099	1.2935	0.322762	0.38359	2.89e-05	0.771591	0.682637	0.872138	0.286	0.3	0.801	0.980504	0.841125	1.14298	0.3718	0.3492	0.273	0.918
AA_DQB1_67_32740636	32740636	I	V	0.3222	0.2845	6.01e-06	1.21425	1.01645	1.32074	0.2791	0.2622	0.327	1.11382	0.897631	1.38209	0.279	0.2608	0.321	0.1588	0.1601	1.1721	0.856419	1.60415	99	i	v	2.911e-06	+++	0	0.7577	1.19889	1.1111	1.29362	0.322767	0.383584	2.9e-05	0.771628	0.682667	0.872181	0.286	0.3	0.801	0.980518	0.841136	1.143	0.3718	0.3492	0.273	0.918
AA_DQB1_70_32740627_E	32740627	P	A	0.1027	0.1114	0.176	0.915541	0.988778	1.04045	0.052	0.0459	0.755	1.07087	0.696675	1.64605	0.0435	0.0756	0.118	-0.4507	0.2885	0.637182	0.361982	1.1216		a	p	0.1309	+-+	-91.9	0.3527	1.09669	0.972917	1.23622	0.15065	0.171022	0.0693	0.861017	0.731855	1.01297	0.0695	0.0797	0.311	0.876762	0.679679	1.13099	0.1314	0.1586	0.0472	1.239
AA_DQB1_70_32740627_G	32740627	P	A	0.2967	0.2541	5.39e-05	1.19509	1.01553	1.30306	0.3728	0.2874	1.77e-06	1.64872	1.3431	2.02388	0.3651	0.2615	0.000697	0.5066	0.1494	1.65964	1.23835	2.22426		a	p	3.526e-10	---	64.6	0.003521	0.781844	0.724023	0.844283	0.238751	0.19091	0.000244	1.31098	1.13498	1.51426	0.3202	0.1984	1.08e-11	1.74049	1.4834	2.04214	0.2393	0.1922	0.00471	0.773
AA_DQB1_70_32740627_R	32740627	A	P	0.3994	0.3655	0.00474	1.12174	1.0092	1.21484	0.4252	0.3331	1.18e-06	1.64757	1.34717	2.01495	0.4086	0.3368	0.0123	0.3526	0.1409	1.42276	1.07943	1.87529	99	a	p	8.936e-07	+++	70.9	0.001044	1.19662	1.114	1.28536	0.389221	0.361697	0.088	1.11221	0.984385	1.25664	0.3896	0.2777	1.13e-08	1.52259	1.31796	1.75899	0.3697	0.3509	0.422	0.939
AA_DQB1_71_32740624_A	32740624	P	A	0.1495	0.1602	0.0549	0.898948	0.988479	1.00225	0.1585	0.1427	0.454	1.10672	0.848756	1.44309	0.3001	0.2239	0.00551	0.4398	0.1585	1.5524	1.13785	2.11797		a	p	0.5727	+--	65.6	0.002988	1.02798	0.934033	1.13139	0.106769	0.115172	0.289	0.905844	0.753809	1.08854	0.2486	0.1486	1.14e-06	1.54558	1.29699	1.84181	0.1079	0.122	0.21	1.163
AA_DQB1_71_32740624_D	32740624	P	A	0.1027	0.1114	0.177	0.91566	0.988795	1.04058	0.0521	0.046	0.755	1.07089	0.696689	1.64608	0.0436	0.0757	0.117	-0.4523	0.2885	0.636163	0.361404	1.11981		a	p	0.131	+-+	-90.6	0.3502	1.09669	0.972917	1.23622	0.150532	0.170855	0.0699	0.861289	0.7321	1.01327	0.0695	0.0796	0.311	0.87672	0.679652	1.13093	0.1314	0.1586	0.0472	1.239
AA_DQB1_71_32740624_K	32740624	P	A	0.1068	0.0796	1.47e-08	1.47483	1.05362	1.68704	0.1559	0.1414	0.105	1.25445	0.953981	1.64957	0.1109	0.1219	0.745	-0.07317	0.22468	0.929443	0.598372	1.44369		a	p	3.635e-08	--+	11	0.1058	0.721012	0.641771	0.810036	NA	NA	NA	NA	NA	NA	0.1096	0.1219	0.292	0.892778	0.723071	1.10232	0.03312	0.001621	1.92e-09	0.072
AA_DQB1_71_32740624_T	32740624	A	P	0.3591	0.3513	0.36	1.03875	1.0031	1.12691	0.366	0.3293	0.0594	1.21119	0.992298	1.47836	0.4544	0.4208	0.127	0.2098	0.1374	1.23343	0.942232	1.61463	99	a	p	0.05569	+++	-30.9	0.2169	1.07347	0.998381	1.15421	0.261294	0.289023	0.0313	0.866561	0.760188	0.987818	0.4275	0.3495	0.00614	1.21369	1.05669	1.39402	0.2703	0.2823	0.417	1.071
AA_DQB1_74_32740615_A	32740615	P	A	0.1068	0.0796	1.48e-08	1.47475	1.05362	1.68696	0.1559	0.1414	0.105	1.25445	0.953981	1.64957	0.1109	0.1219	0.745	-0.07317	0.22468	0.929443	0.598372	1.44369		a	p	3.648e-08	--+	10.9	0.1059	0.721084	0.641835	0.810117	NA	NA	NA	NA	NA	NA	0.1096	0.1219	0.292	0.892744	0.723045	1.10227	0.03312	0.001621	1.92e-09	0.072
AA_DQB1_74_32740615_E	32740615	A	P	0.359	0.3512	0.362	1.03861	1.00309	1.12675	0.366	0.3293	0.0594	1.21131	0.992397	1.47851	0.4544	0.4208	0.127	0.2098	0.1374	1.23343	0.942232	1.61463	99	a	p	0.05603	+++	-30.5	0.2161	1.07337	0.998281	1.1541	0.261297	0.289028	0.0313	0.866556	0.760183	0.987814	0.4275	0.3495	0.00614	1.2137	1.0567	1.39403	0.2703	0.2823	0.417	1.071
AA_DQB1_74_32740615_S	32740615	P	A	0.2522	0.2716	0.011	0.890084	0.989602	0.973681	0.2104	0.1883	0.391	1.11071	0.8738	1.41185	0.3436	0.2993	0.0659	0.2725	0.1481	1.31324	0.982381	1.75554		a	p	0.1372	+--	52.2	0.01518	1.06311	0.980638	1.15252	0.257272	0.285984	0.0263	0.862539	0.756571	0.983349	0.318	0.2279	0.000176	1.34171	1.15067	1.56448	0.2382	0.2807	0.00952	1.254
AA_DQB1_75_32740612	32740612	V	L	0.3591	0.3513	0.364	1.03846	1.00308	1.12659	0.366	0.3293	0.0594	1.21131	0.992397	1.47851	0.4544	0.4208	0.126	0.2101	0.1374	1.2338	0.942514	1.61511		l	v	0.05634	---	-30.1	0.215	0.931741	0.866563	1.00182	0.26133	0.289059	0.0313	0.866575	0.760203	0.987832	0.4275	0.3495	0.00614	1.2137	1.0567	1.39403	0.2703	0.2823	0.417	1.071
AA_DQB1_77_32740606	32740606	R	T	0.2563	0.2398	0.0469	1.09518	1.00819	1.19795	0.3142	0.2837	0.0702	1.21155	0.984265	1.49132	0.4109	0.3454	0.0217	0.322	0.1403	1.37988	1.04813	1.81664		t	r	0.00198	---	-36.8	0.2317	0.882938	0.81604	0.955321	0.110739	0.118135	0.337	0.91461	0.761659	1.09828	0.3581	0.2702	0.000651	1.28649	1.11303	1.48697	0.109	0.1234	0.191	1.17
AA_DQB1_84_32740585_E	32740585	P	A	0.4686	0.4397	0.00487	1.12005	1.00899	1.21203	0.4749	0.3964	0.000156	1.46112	1.20035	1.77853	0.4985	0.353	9.2e-06	0.6339	0.1429	1.88495	1.42449	2.49424		a	p	5.368e-07	---	76.1	0.0002283	0.834268	0.777127	0.895612	0.439978	0.465466	0.0332	0.878624	0.779829	0.989936	0.4547	0.3261	3.67e-14	1.75632	1.51806	2.03196	NA	NA	NA	NA
AA_DQB1_84_32740585_Q	32740585	A	P	0.4686	0.4397	0.00485	1.12008	1.00899	1.21205	0.475	0.3965	0.000153	1.46185	1.20095	1.77942	0.4985	0.3531	9.28e-06	0.6336	0.1429	1.88438	1.42407	2.49349	99	a	p	5.307e-07	+++	76.2	0.0002277	1.19877	1.11689	1.28667	0.439978	0.465466	0.0332	0.878624	0.779829	0.989936	0.4547	0.3261	3.67e-14	1.7563	1.51805	2.03194	NA	NA	NA	NA
AA_DQB1_85_32740582_L	32740582	A	P	0.4686	0.4397	0.00485	1.12009	1.00899	1.21206	0.4749	0.3964	0.000156	1.46112	1.20035	1.77853	0.4985	0.3531	9.29e-06	0.6336	0.1429	1.88438	1.42407	2.49349	99	a	p	5.351e-07	+++	76.1	0.00023	1.19865	1.11677	1.28654	0.440157	0.465619	0.0333	0.878604	0.779765	0.989972	0.4547	0.3261	3.67e-14	1.7563	1.51805	2.03194	NA	NA	NA	NA
AA_DQB1_85_32740582_V	32740582	P	A	0.4685	0.4396	0.0049	1.11997	1.00898	1.21195	0.4749	0.3964	0.000156	1.46112	1.20035	1.77853	0.4985	0.353	9.2e-06	0.6339	0.1429	1.88495	1.42449	2.49424		a	p	5.412e-07	---	76.2	0.0002276	0.834268	0.777127	0.895612	0.440157	0.465619	0.0333	0.878604	0.779765	0.989972	0.4547	0.3261	3.67e-14	1.75629	1.51804	2.03193	NA	NA	NA	NA
AA_DQB1_86_32740579_A	32740579	P	A	0.4094	0.3476	1.28e-08	1.26439	1.01914	1.37084	0.4446	0.3636	2.56e-05	1.53265	1.25641	1.86964	0.4898	0.3252	3.69e-07	0.757	0.1489	2.13187	1.59226	2.85435		a	p	2.699e-15	---	70.3	0.001193	0.746395	0.694183	0.802535	0.406912	0.400566	0.868	1.01044	0.894387	1.14155	0.4267	0.2971	2.34e-13	1.73813	1.49922	2.0151	0.4476	0.3812	0.000983	0.774
AA_DQB1_86_32740579_E	32740579	A	P	0.4686	0.4397	0.00488	1.12001	1.00899	1.212	0.4755	0.3975	0.000163	1.46053	1.19963	1.77817	0.4986	0.3531	9.32e-06	0.6335	0.1429	1.88419	1.42392	2.49324	99	a	p	5.506e-07	+++	76.1	0.0002327	1.19854	1.11644	1.28666	0.439999	0.465497	0.0332	0.878598	0.779809	0.989903	0.4547	0.3261	3.67e-14	1.75628	1.51803	2.03192	0.4776	0.4836	0.72	1.028
AA_DQB1_86_32740579_G	32740579	P	A	0.0592	0.0921	4.9e-07	0.659383	0.934656	0.775551	0.031	0.0342	0.274	0.749312	0.446536	1.25739	0.0089	0.0282	0.0439	-1.151	0.5711	0.31632	0.103275	0.968851		a	p	8.577e-08	+++	0	0.3891	1.52044	1.30412	1.77264	0.0329943	0.0647612	2.92e-07	0.479074	0.355247	0.646065	0.0277	0.0292	0.323	1.22199	0.821019	1.8188	0.03098	0.1024	1.06e-09	3.41
AA_DQB1_87_32740576_F	32740576	P	A	0.2599	0.1874	1.08e-17	1.49983	1.03868	1.64704	0.2859	0.2204	2.87e-05	1.62125	1.29281	2.03314	0.1897	0.1017	0.000357	0.7365	0.2063	2.08861	1.39396	3.12942		a	p	1.899e-23	---	-49	0.2611	0.650054	0.597278	0.707493	0.300279	0.285559	0.353	1.06319	0.934327	1.20982	0.1786	0.1489	1.43e-05	1.53544	1.26504	1.86364	0.3408	0.2591	6.11e-06	0.688
AA_DQB1_87_32740576_L	32740576	A	P	0.4686	0.4397	0.00486	1.12008	1.00899	1.21207	0.4749	0.3966	0.000158	1.46053	1.19987	1.77782	0.4985	0.3531	9.33e-06	0.6334	0.1429	1.88401	1.42378	2.49299	99	a	p	5.415e-07	+++	76.1	0.0002329	1.19865	1.11655	1.28679	0.440194	0.465701	0.0331	0.878528	0.779739	0.989834	0.4547	0.326	3.66e-14	1.75639	1.51812	2.03205	0.4776	0.4836	0.72	1.028
AA_DQB1_87_32740576_Y	32740576	P	A	0.2087	0.2522	1.62e-06	0.792154	0.978059	0.871288	0.1892	0.1765	0.87	1.02063	0.799776	1.30247	0.3089	0.2517	0.0373	0.3132	0.1504	1.3678	1.01859	1.83672		a	p	0.0002934	+--	71.9	0.0008027	1.16988	1.07469	1.2735	0.139792	0.179957	0.000106	0.733014	0.624787	0.859987	0.2761	0.1775	5.38e-07	1.52545	1.29325	1.79934	0.1378	0.2244	7.68e-08	1.769
AA_DQB1_89_32740570_G	32740570	P	A	0.4685	0.4396	0.00492	1.11991	1.00898	1.21189	0.4749	0.3966	0.000158	1.46053	1.19987	1.77782	0.4985	0.3531	9.33e-06	0.6335	0.1429	1.88419	1.42392	2.49324		a	p	5.504e-07	---	76.1	0.000231	0.834352	0.777204	0.895702	0.440118	0.465584	0.0333	0.878617	0.77979	0.989968	0.4547	0.326	3.65e-14	1.75642	1.51815	2.03209	NA	NA	NA	NA
AA_DQB1_89_32740570_T	32740570	A	P	0.4686	0.4397	0.00485	1.1201	1.00899	1.21209	0.4749	0.3966	0.000158	1.46053	1.19987	1.77782	0.4985	0.3531	9.33e-06	0.6334	0.1429	1.88401	1.42378	2.49299	99	a	p	5.402e-07	+++	76.1	0.0002331	1.19865	1.11655	1.28679	0.440118	0.465584	0.0333	0.878617	0.77979	0.989968	0.4547	0.326	3.65e-14	1.7564	1.51813	2.03206	NA	NA	NA	NA
AA_DQB1_9_32740810_F	32740810	P	A	0.2305	0.1877	9.3e-07	1.26638	1.02253	1.39168	0.249	0.1723	2.37e-06	1.75998	1.39165	2.22578	0.1067	0.1127	0.954	-0.01196	0.20795	0.988111	0.657348	1.48531		a	p	7.343e-10	--+	52.4	0.01494	0.764143	0.701417	0.832478	0.276954	0.239224	0.00395	1.22154	1.06653	1.39908	0.1371	0.1225	0.0141	1.2802	1.05098	1.55941	0.2575	0.2226	0.0503	0.842
AA_DQB1_9_32740810_L	32740810	P	A	0.1126	0.0935	0.002	1.21811	1.025	1.38053	0.0741	0.077	0.488	0.873803	0.596949	1.27906	0.1247	0.0639	0.00229	0.7841	0.2571	2.19043	1.32337	3.62559		a	p	0.0008185	-+-	50.8	0.01717	0.820698	0.731074	0.921309	0.167798	0.209161	0.000471	0.767137	0.659912	0.891784	0.107	0.099	0.0967	1.21917	0.964941	1.54039	0.2115	0.1892	0.172	0.88
AA_DQB1_9_32740810_Y	32740810	A	P	0.3429	0.2809	2.35e-10	1.31091	1.02293	1.4254	0.3204	0.2475	6.98e-05	1.55722	1.25177	1.9372	0.2313	0.1764	0.0358	0.35037	0.16691	1.41959	1.0235	1.96898	99	a	p	2.396e-14	+++	-82.2	0.3337	1.34434	1.24589	1.45056	0.444766	0.4484	0.749	0.980946	0.871812	1.10374	0.2441	0.2213	0.00131	1.30937	1.11086	1.54336	0.4679	0.4118	0.00645	0.811
AA_DQB1_-9_32742292_I	32742292	P	A	0.1493	0.1599	0.056	0.899326	0.98852	1.00271	0.1582	0.1421	0.449	1.10805	0.849608	1.4451	0.3	0.223	0.0053	0.4418	0.1584	1.5555	1.14035	2.1218		a	p	0.5832	+--	65.8	0.002874	1.02716	0.933286	1.13048	0.107479	0.116273	0.274	0.9037	0.753102	1.08441	0.2484	0.1485	1.28e-06	1.54217	1.29419	1.83767	0.1122	0.1218	0.364	1.114
AA_DQB1_-9_32742292_M	32742292	A	P	0.1781	0.2127	1.01e-05	0.797088	0.977429	0.881505	0.175	0.164	0.814	1.031	0.799726	1.32916	0.302	0.2242	0.00393	0.4565	0.1583	1.57854	1.15746	2.1528	99	a	p	0.002575	-++	78.7	8.34e-05	0.871273	0.796624	0.952916	0.139857	0.176891	0.000376	0.751306	0.640196	0.8817	0.2598	0.1534	3.98e-08	1.62205	1.36488	1.92768	0.1378	0.2191	3.31e-07	1.716
AA_DQB1_90_32740567_I	32740567	P	A	0.4685	0.4396	0.00491	1.11993	1.00898	1.21191	0.4749	0.3966	0.000159	1.46038	1.19975	1.77764	0.4985	0.3529	9.14e-06	0.6342	0.1429	1.88551	1.42492	2.49499		a	p	5.467e-07	---	76.2	0.000228	0.834352	0.777204	0.895702	0.440206	0.465658	0.0333	0.878644	0.779803	0.990013	0.4547	0.3261	3.7e-14	1.75618	1.51795	2.0318	NA	NA	NA	NA
AA_DQB1_90_32740567_T	32740567	A	P	0.4685	0.4396	0.00491	1.11995	1.00898	1.21192	0.4749	0.3966	0.000159	1.46038	1.19975	1.77764	0.4985	0.353	9.27e-06	0.6337	0.1429	1.88457	1.42421	2.49374	99	a	p	5.485e-07	+++	76.1	0.0002307	1.19854	1.11644	1.28666	0.440206	0.465658	0.0333	0.878644	0.779803	0.990013	0.4547	0.326	3.65e-14	1.7564	1.51813	2.03207	NA	NA	NA	NA
AA_DRB1_-1_32665412_A	32665412	A	P	0.1643	0.1188	1.14e-10	1.44242	1.04164	1.61234	0.2726	0.1915	2.15e-07	1.81866	1.4508	2.2798	0.2449	0.1335	1.48e-05	0.7715	0.1781	2.16301	1.52566	3.06662	99	a	p	3.364e-19	+++	43.1	0.02981	1.551	1.40897	1.70735	0.222808	0.202826	0.154	1.11076	0.961683	1.28295	0.2229	0.1045	1.29e-13	2.14736	1.75419	2.62865	0.2297	0.1957	0.0601	0.838
AA_DRB1_-1_32665412_S	32665412	P	A	0.1627	0.1178	2.28e-10	1.43352	1.0409	1.6023	0.2713	0.1906	2.29e-07	1.81575	1.44848	2.27616	0.2406	0.1313	2.37e-05	0.747159	0.176783	2.11099	1.49282	2.98516		a	p	1.017e-18	---	41.3	0.03312	0.64895	0.589524	0.714366	0.214718	0.187007	0.0306	1.17635	1.0158	1.36228	0.2218	0.103	1.09e-13	2.15713	1.76116	2.64212	0.2254	0.1811	0.00738	0.774
AA_DRB1_10_32660118_E	32660118	P	A	0.0135	0.0175	0.0874	0.75097	0.910248	1.04286	0.022	0.0205	0.526	0.805816	0.41383	1.5691	0.0197	0.0124	0.337	0.5102	0.5319	1.66562	0.587239	4.72432		a	p	0.1376	++-	-96	0.3605	1.23961	0.933685	1.64578	NA	NA	NA	NA	NA	NA	0.0109	0.0174	0.176	0.670768	0.376311	1.19564	0.003205	0.004632	0.482	1.572
AA_DRB1_10_32660118_Q	32660118	A	P	0.4158	0.451	0.000575	0.870533	0.989116	0.942028	0.3598	0.4088	0.000361	0.70759	0.585112	0.855706	0.4266	0.4925	0.0827	-0.2372	0.1367	0.788834	0.603426	1.03121	99	a	p	1.274e-06	---	3.1	0.127	0.840465	0.783359	0.901734	0.337746	0.380758	0.00103	0.816168	0.722428	0.922073	0.4238	0.5167	1.66e-07	0.701005	0.613692	0.800741	0.3675	0.3884	0.437	1.063
AA_DRB1_10_32660118_Y	32660118	P	A	0.4023	0.4335	0.00261	0.885653	0.990445	0.958521	0.3381	0.3885	0.000647	0.716541	0.591643	0.867805	0.4074	0.4804	0.0472	-0.271	0.1366	0.762616	0.583485	0.996741		a	p	8.111e-06	+++	15.3	0.09442	1.1741	1.09411	1.25993	0.332627	0.376024	0.00119	0.817622	0.723388	0.924132	0.413	0.4997	9.74e-07	0.719284	0.63041	0.820689	0.3643	0.3837	0.496	1.055
AA_DRB1_104_32657566_A	32657566	P	A	0.3501	0.3574	0.601	0.97826	0.998193	1.06218	0.3137	0.3463	0.177	0.873366	0.717777	1.06268	0.2126	0.3123	0.000192	-0.5797	0.1555	0.560066	0.412929	0.759633		a	p	0.06053	+++	67.9	0.001951	1.07304	0.996809	1.15511	0.393181	0.372679	0.0633	1.12133	0.993737	1.26531	0.2777	0.3312	0.0327	0.852033	0.735561	0.986947	0.3536	0.3643	0.526	1.052
AA_DRB1_104_32657566_S	32657566	A	P	0.3502	0.3575	0.602	0.978358	0.998201	1.06228	0.3138	0.3464	0.177	0.873629	0.717852	1.06321	0.2126	0.3124	0.000192	-0.5799	0.1555	0.559954	0.412846	0.759481	99	a	p	0.06103	---	68	0.001942	0.932021	0.865805	1.0033	0.393925	0.373819	0.066	1.12024	0.992579	1.26431	0.2778	0.3313	0.033	0.852232	0.735718	0.987197	0.3536	0.3643	0.526	1.052
AA_DRB1_11_32660115_D	32660115	P	A	0.1216	0.0984	5.46e-05	1.28634	1.03128	1.45372	0.1291	0.1227	0.885	1.02097	0.770523	1.35281	0.1183	0.1328	0.346	-0.1844	0.1958	0.831603	0.566562	1.22063		a	p	0.0008299	--+	33.5	0.04947	0.832269	0.747363	0.92682	0.203088	0.142699	8.46e-08	1.52874	1.30994	1.78409	0.1367	0.136	0.446	1.0781	0.888539	1.3081	0.1731	0.138	0.00292	0.733
AA_DRB1_11_32660115_G	32660115	P	A	0.0866	0.0659	2.2e-06	1.4242	1.05314	1.64876	0.1198	0.1135	0.114	1.27278	0.943933	1.71618	0.0234	0.0365	0.179	-0.5353	0.3987	0.585494	0.268004	1.27909		a	p	3.231e-06	--+	20.6	0.08052	0.734915	0.645486	0.836735	NA	NA	NA	NA	NA	NA	0.0426	0.0471	0.891	1.02328	0.736148	1.4224	0.007479	0.002779	0.159	0.487
AA_DRB1_11_32660115_L	32660115	P	A	0.0536	0.0636	0.0221	0.822029	0.967635	0.972285	0.0257	0.0292	0.525	1.20949	0.672587	2.17499	0.006	0.0091	0.514	-0.5033	0.7705	0.604532	0.133523	2.73705		a	p	0.03724	+-+	0	0.4218	1.18602	1.01013	1.39253	0.0398646	0.0503466	0.134	0.805976	0.605847	1.07221	0.0154	0.0171	0.0691	1.64589	0.961709	2.81682	0.0406	0.05697	0.0427	1.461
AA_DRB1_11_32660115_P	32660115	P	A	0.1803	0.1277	4.5e-13	1.48544	1.04331	1.65342	0.3009	0.2208	2.82e-07	1.76138	1.41922	2.18604	0.3566	0.1886	7.28e-08	0.8288	0.1539	2.29057	1.69411	3.09703		a	p	1.716e-23	---	50.2	0.01799	0.627445	0.572563	0.687586	0.22965	0.194304	0.00723	1.21838	1.05542	1.4065	0.2842	0.1358	1.57e-17	2.19347	1.83094	2.62779	0.2393	0.1906	0.00361	0.762
AA_DRB1_11_32660115_S	32660115	P	A	0.4024	0.4335	0.00269	0.885963	0.990472	0.958857	0.3382	0.3889	0.000649	0.716491	0.591556	0.867812	0.4066	0.4802	0.0446	-0.2748	0.1368	0.759724	0.581044	0.99335		a	p	8.188e-06	+++	16.3	0.0916	1.1741	1.09411	1.25993	0.332626	0.376024	0.00119	0.817618	0.723385	0.924127	0.4131	0.4997	9.78e-07	0.719349	0.630476	0.82075	0.3643	0.3837	0.496	1.055
AA_DRB1_11_32660115_V	32660115	P	A	0.1555	0.211	3.25e-13	0.674705	0.959195	0.750061	0.0882	0.1267	0.000154	0.549965	0.4035	0.749597	0.0911	0.1546	0.00364	-0.59831	0.20574	0.54974	0.367306	0.822786		a	p	9.636e-18	+++	-78	0.3251	1.53036	1.38858	1.6866	0.191972	0.233238	0.00341	0.804781	0.694992	0.931913	0.1093	0.1661	4.04e-05	0.66549	0.547899	0.808319	0.1752	0.2279	0.000317	1.419
AA_DRB1_12_32660112	32660112	T	K	0.4024	0.4335	0.00269	0.885963	0.990472	0.958857	0.3382	0.3889	0.000649	0.716484	0.59155	0.867803	0.4066	0.4802	0.0446	-0.2748	0.1368	0.759724	0.581044	0.99335	99	t	k	8.186e-06	---	16.3	0.09158	0.851718	0.793692	0.913986	0.332096	0.376022	0.00106	0.815922	0.721879	0.922217	0.4131	0.4997	9.77e-07	0.719341	0.63047	0.820739	0.3643	0.3837	0.496	1.055
AA_DRB1_120_32657518_N	32657518	P	A	0.1556	0.2109	3.22e-13	0.674199	0.959044	0.749646	0.087	0.1283	7.6e-05	0.532592	0.389835	0.727626	0.0924	0.1562	0.00399	-0.59028	0.20501	0.554172	0.370797	0.828233		a	p	6.422e-18	+++	-52.3	0.2691	1.53526	1.39276	1.69234	0.191205	0.233135	0.00273	0.800353	0.690924	0.927114	0.1094	0.1655	4.9e-05	0.668256	0.550104	0.811785	0.1763	0.2283	0.000373	1.412
AA_DRB1_120_32657518_S	32657518	A	P	0.1557	0.211	3.25e-13	0.674206	0.959045	0.749653	0.0871	0.1284	7.73e-05	0.532965	0.390108	0.728136	0.0925	0.1564	0.00399	-0.59018	0.20499	0.554228	0.370849	0.828284	99	a	p	6.511e-18	---	-53	0.2706	0.651355	0.590898	0.717998	0.191976	0.23431	0.00248	0.798413	0.689127	0.925029	0.1095	0.1656	4.97e-05	0.668499	0.550303	0.812083	0.1763	0.2283	0.000373	1.412
AA_DRB1_13_32660109_F	32660109	P	A	0.1885	0.1793	0.245	1.06031	1.00579	1.17019	0.1757	0.1709	0.889	1.01762	0.795656	1.30151	0.1431	0.1536	0.488	-0.1256	0.1811	0.881968	0.618439	1.25779		a	p	0.3559	--+	0	0.6056	0.959157	0.877839	1.04801	0.246705	0.196757	6.72e-05	1.33031	1.15677	1.52989	0.1625	0.1697	0.37	1.086	0.906883	1.3005	0.2169	0.1996	0.176	0.881
AA_DRB1_13_32660109_G	32660109	P	A	0.2138	0.1887	0.00448	1.15321	1.01411	1.27232	0.1481	0.1747	0.00695	0.694613	0.533125	0.905018	0.2185	0.2338	0.608	-0.08223	0.1602	0.92106	0.672857	1.26082		a	p	0.131	-++	70	0.001263	0.934167	0.855135	1.0205	0.203437	0.188732	0.171	1.10757	0.957368	1.28133	0.2242	0.2529	0.00637	0.801325	0.68344	0.939543	0.2265	0.1658	3.9e-06	0.643
AA_DRB1_13_32660109_H	32660109	P	A	0.1421	0.1935	2.78e-12	0.675353	0.957707	0.753952	0.0665	0.1064	0.000157	0.520482	0.37095	0.730291	0.0725	0.1427	0.000528	-0.7791	0.2248	0.458819	0.295316	0.712844		a	p	4.332e-17	+++	11.2	0.1051	1.54759	1.39763	1.71364	0.187148	0.228487	0.00418	0.807238	0.696289	0.935867	0.0987	0.1491	0.000112	0.666214	0.542176	0.81863	0.172	0.2233	0.000442	1.41
AA_DRB1_13_32660109_R	32660109	P	A	0.1803	0.1276	4.63e-13	1.48508	1.04327	1.65299	0.3009	0.2208	2.82e-07	1.76138	1.41922	2.18604	0.3567	0.1886	7.21e-08	0.8291	0.1539	2.29126	1.69462	3.09796		a	p	1.755e-23	---	50.4	0.0178	0.62757	0.572678	0.687724	0.229416	0.194279	0.00756	1.21714	1.05429	1.40515	0.2843	0.1358	1.35e-17	2.19761	1.83426	2.63294	0.2393	0.1906	0.00361	0.762
AA_DRB1_13_32660109_S	32660109	P	A	0.1879	0.244	1.7e-10	0.718191	0.966926	0.795	0.1905	0.2149	0.0689	0.801476	0.63139	1.01738	0.1883	0.2466	0.0478	-0.33976	0.1717	0.711941	0.508499	0.996777		a	p	6.131e-12	+++	0	0.7017	1.37163	1.25338	1.50104	0.128692	0.187347	7.11e-09	0.617628	0.522134	0.730588	0.1888	0.2461	0.000957	0.756207	0.640653	0.892605	0.1378	0.2179	2.6e-07	1.729
AA_DRB1_13_32660109_Y	32660109	P	A	0.0866	0.0659	2.19e-06	1.42427	1.05314	1.64884	0.1198	0.1135	0.113	1.27379	0.944689	1.71755	0.0234	0.0365	0.18	-0.5346	0.3987	0.585904	0.268192	1.27999		a	p	3.182e-06	--+	20.4	0.08097	0.734768	0.645357	0.836568	NA	NA	NA	NA	NA	NA	0.0427	0.0472	0.88	1.02578	0.738004	1.42578	0.007479	0.002779	0.159	0.487
AA_DRB1_133_32657479_L	32657479	P	A	0.1799	0.1277	7.54e-13	1.47986	1.04289	1.64724	0.2998	0.2205	3.21e-07	1.7591	1.41654	2.18448	0.3562	0.1878	7.44e-08	0.8287	0.154	2.29034	1.69361	3.09733		a	p	3.585e-23	---	51.1	0.01677	0.629393	0.574341	0.689721	0.229958	0.194361	0.00689	1.21966	1.05664	1.40784	0.2804	0.1335	1.51e-18	2.26639	1.8884	2.72003	0.2404	0.1906	0.00313	0.758
AA_DRB1_133_32657479_R	32657479	A	P	0.18	0.1279	7.98e-13	1.47932	1.04286	1.64667	0.3001	0.2206	3.09e-07	1.76068	1.41782	2.18645	0.3563	0.1879	7.43e-08	0.8287	0.154	2.29034	1.69361	3.09733	99	a	p	3.704e-23	+++	51.3	0.0165	1.58867	1.44972	1.74095	0.230746	0.195545	0.0074	1.21772	1.05483	1.40577	0.2814	0.1338	1.45e-18	2.26655	1.88868	2.72003	0.2404	0.1906	0.00313	0.758
AA_DRB1_14_32660106	32660106	K	E	0.0866	0.0659	2.2e-06	1.42423	1.05314	1.64879	0.1198	0.1135	0.112	1.27456	0.945256	1.71858	0.0238	0.0367	0.187	-0.5261	0.3984	0.590905	0.27064	1.29016		e	k	3.114e-06	--+	19	0.08457	0.734548	0.645163	0.836317	NA	NA	NA	NA	NA	NA	0.0428	0.0472	0.865	1.02891	0.74024	1.43016	0.007479	0.002779	0.159	0.487
AA_DRB1_140_32657458_A	32657458	P	A	0.4411	0.3553	2.95e-19	1.43522	1.02918	1.55416	0.5725	0.4831	3.08e-08	1.69803	1.40784	2.04804	0.5006	0.3627	0.000112	0.53	0.1372	1.69893	1.29834	2.22312		a	p	3.677e-28	---	-10.2	0.1628	0.672401	0.626469	0.721701	0.476756	0.388888	1.21e-08	1.40406	1.24881	1.57862	0.4773	0.3331	5.58e-16	1.79078	1.55524	2.062	0.4615	0.3881	0.00015	0.745
AA_DRB1_140_32657458_T	32657458	A	P	0.4412	0.3554	3.17e-19	1.43473	1.02916	1.55363	0.5726	0.4832	3.02e-08	1.69868	1.40832	2.0489	0.5006	0.3628	0.000112	0.5301	0.1372	1.6991	1.29847	2.22334	99	a	p	3.943e-28	+++	-9.4	0.1607	1.48691	1.38534	1.59593	0.477503	0.39001	1.29e-08	1.40379	1.24835	1.57859	0.4775	0.3333	5.31e-16	1.79189	1.55614	2.06336	0.4615	0.3881	0.00015	0.745
AA_DRB1_142_32657452_M	32657452	P	A	0.1798	0.1277	7.64e-13	1.47972	1.04288	1.64708	0.2999	0.2205	3.15e-07	1.75962	1.41697	2.18514	0.3561	0.1878	7.53e-08	0.8282	0.154	2.28919	1.69276	3.09578		a	p	3.636e-23	---	51	0.01681	0.629456	0.574398	0.68979	0.229904	0.194293	0.00687	1.2197	1.0567	1.40786	0.2821	0.1337	1.64e-18	2.26133	1.88475	2.71314	0.2404	0.1906	0.00313	0.758
AA_DRB1_142_32657452_V	32657452	A	P	0.18	0.1279	7.98e-13	1.47936	1.04286	1.64672	0.3001	0.2206	3.08e-07	1.76068	1.41782	2.18645	0.3562	0.1879	7.52e-08	0.8283	0.154	2.28942	1.69293	3.09609	99	a	p	3.716e-23	+++	51.2	0.01661	1.58867	1.44972	1.74095	0.230025	0.194476	0.00695	1.21942	1.05642	1.40756	0.2834	0.134	1.63e-18	2.26014	1.88402	2.71136	0.2404	0.1906	0.00313	0.758
AA_DRB1_149_32657431_H	32657431	P	A	0.4033	0.4337	0.00344	0.888749	0.990723	0.961835	0.3413	0.389	0.00116	0.728294	0.601478	0.881849	0.408	0.4821	0.0451	-0.2732	0.1363	0.760941	0.582545	0.993966		a	p	1.473e-05	+++	8.1	0.1135	1.16848	1.08908	1.25366	0.332197	0.377951	0.000699	0.810635	0.717468	0.915899	0.4143	0.5019	4.31e-07	0.71146	0.623475	0.811862	0.3643	0.384	0.494	1.056
AA_DRB1_149_32657431_Q	32657431	A	P	0.4035	0.4339	0.00341	0.888687	0.99072	0.961748	0.3415	0.3892	0.00118	0.72871	0.601844	0.882317	0.4082	0.4823	0.0453	-0.2729	0.1363	0.761169	0.58272	0.994265	99	a	p	1.476e-05	---	7.6	0.1149	0.855816	0.797667	0.918204	0.333484	0.379151	0.000697	0.810392	0.717152	0.915754	0.4144	0.502	4.28e-07	0.711421	0.623453	0.811801	0.3643	0.384	0.494	1.056
AA_DRB1_16_32660100_H	32660100	A	P	0.2362	0.2153	0.0361	1.10625	1.00958	1.21581	0.1638	0.1935	0.00493	0.696213	0.540885	0.896146	0.2248	0.2498	0.346	-0.1481	0.1573	0.862345	0.633555	1.17375	99	a	p	0.4962	+--	68.6	0.00173	1.02994	0.945951	1.12138	0.221894	0.20818	0.174	1.10464	0.957204	1.27478	0.2362	0.2689	0.00503	0.800591	0.685366	0.935187	0.2415	0.189	0.000113	0.698
AA_DRB1_16_32660100_Y	32660100	P	A	0.2137	0.1887	0.0045	1.15313	1.0141	1.27223	0.1481	0.1746	0.007	0.694822	0.533285	0.90529	0.218	0.2336	0.601	-0.08381	0.16024	0.919606	0.671742	1.25893		a	p	0.1318	-++	70	0.001263	0.93426	0.85522	1.02061	0.204241	0.189697	0.177	1.1057	0.955941	1.27892	0.224	0.2527	0.00624	0.800726	0.682837	0.938968	0.2265	0.1658	3.9e-06	0.643
AA_DRB1_-16_32665457_A	32665457	A	P	0.4159	0.451	0.000596	0.870933	0.989157	0.942424	0.3592	0.4082	0.000333	0.706113	0.583879	0.853936	0.4272	0.4928	0.0841	-0.2358	0.1365	0.789939	0.604508	1.03225	99	a	p	1.294e-06	---	5.1	0.1216	0.840633	0.783516	0.901914	0.337733	0.380739	0.00103	0.816103	0.722352	0.922023	0.4237	0.5167	1.61e-07	0.700716	0.613424	0.800431	0.3675	0.3879	0.452	1.061
AA_DRB1_-16_32665457_V	32665457	P	A	0.4145	0.4503	0.000459	0.86829	0.988904	0.939674	0.3582	0.4075	0.000329	0.705428	0.583119	0.853392	0.4219	0.4903	0.0656	-0.2538	0.1379	0.775847	0.592097	1.01662		a	p	8.101e-07	+++	5.4	0.1206	1.19399	1.11286	1.28103	0.329672	0.364936	0.00621	0.842427	0.744673	0.953014	0.423	0.5157	1.7e-07	0.700781	0.61335	0.800676	0.3632	0.3733	0.881	1.012
AA_DRB1_166_32657380_Q	32657380	P	A	0.0135	0.0175	0.0873	0.750947	0.910233	1.04285	0.0221	0.0205	0.532	0.808722	0.415485	1.57414	0.0196	0.0125	0.361	0.4839	0.5299	1.62239	0.574242	4.58369		a	p	0.1357	++-	0	0.3826	1.24073	0.934526	1.64726	NA	NA	NA	NA	NA	NA	0.0112	0.0173	0.207	0.690255	0.388063	1.22777	0.004274	0.004863	0.665	1.28
AA_DRB1_166_32657380_R	32657380	A	P	0.0136	0.0177	0.0853	0.749424	0.909586	1.0409	0.0223	0.0206	0.54	0.811882	0.417109	1.58029	0.0197	0.0127	0.36	0.4856	0.53	1.62515	0.575107	4.59239	99	a	p	0.1347	--+	0	0.3791	0.805494	0.606703	1.06942	NA	NA	NA	NA	NA	NA	0.0114	0.0174	0.203	0.687926	0.386761	1.2236	0.004274	0.004863	0.665	1.28
AA_DRB1_-17_32665460_A	32665460	A	P	0.235	0.1918	7.33e-07	1.26969	1.02282	1.39551	0.3277	0.2508	1.93e-07	1.74037	1.41278	2.14394	0.3669	0.1995	8.07e-08	0.8228	0.1533	2.27687	1.68595	3.07489	99	a	p	3.248e-15	+++	78.2	0.0001038	1.39473	1.28401	1.51499	0.277531	0.260476	0.265	1.07897	0.944252	1.2329	0.3005	0.1541	1.6e-18	2.19062	1.83892	2.60959	0.2842	0.2622	0.353	0.923
AA_DRB1_-17_32665460_T	32665460	P	A	0.2337	0.1911	1.11e-06	1.26482	1.02246	1.39022	0.3267	0.25	1.94e-07	1.7395	1.41207	2.14287	0.3616	0.197	1.55e-07	0.7984	0.1522	2.22198	1.64887	2.9943		a	p	7.194e-15	---	77.5	0.0001383	0.720075	0.662913	0.782166	0.269486	0.244688	0.0754	1.1304	0.987845	1.29354	0.2999	0.1531	1.36e-18	2.1927	1.84093	2.61168	0.2799	0.2476	0.104	0.868
AA_DRB1_180_32657338_L	32657338	P	A	0.1422	0.1935	2.73e-12	0.674725	0.957527	0.753413	0.0653	0.1079	7.5e-05	0.501175	0.356002	0.705548	0.0732	0.1442	0.000534	-0.7747	0.2237	0.460842	0.297259	0.714446		a	p	2.704e-17	+++	19.8	0.08257	1.55364	1.40282	1.72067	0.186301	0.228232	0.00353	0.803536	0.69277	0.932013	0.0986	0.1484	0.000133	0.668933	0.544281	0.822133	0.1731	0.2237	0.00052	1.403
AA_DRB1_180_32657338_V	32657338	A	P	0.1424	0.1937	2.6e-12	0.674361	0.957456	0.753036	0.0655	0.108	7.68e-05	0.501676	0.356358	0.706254	0.0734	0.1443	0.000539	-0.7742	0.2237	0.461072	0.297408	0.714803	99	a	p	2.598e-17	---	19.2	0.08422	0.643393	0.580935	0.712565	0.186897	0.229021	0.00332	0.802247	0.691568	0.930638	0.0988	0.1485	0.00013	0.668596	0.543999	0.821732	0.1763	0.2237	0.00106	1.374
AA_DRB1_181_32657335_M	32657335	P	A	0.221	0.1813	2.08e-08	1.31766	1.02697	1.45111	0.2705	0.259	0.324	1.11115	0.901114	1.37016	0.1585	0.1805	0.249	-0.1971	0.1709	0.821109	0.587391	1.14782		a	p	4.848e-07	--+	52.3	0.01506	0.804367	0.738918	0.875612	0.212241	0.148949	8.04e-08	1.51218	1.30117	1.75741	0.1901	0.1999	0.72	1.0316	0.870288	1.2228	0.1848	0.1454	0.00203	0.731
AA_DRB1_181_32657335_T	32657335	A	P	0.2212	0.1815	2.15e-08	1.31739	1.02695	1.45084	0.2707	0.2592	0.322	1.1116	0.901474	1.3707	0.1588	0.1807	0.25	-0.1965	0.1709	0.821601	0.587744	1.14851	99	a	p	4.913e-07	++-	52.1	0.01533	1.24309	1.14194	1.35319	0.212567	0.149659	1.03e-07	1.50578	1.296	1.74951	0.1903	0.2002	0.724	1.03105	0.869835	1.22215	0.1848	0.1454	0.00203	0.731
AA_DRB1_189_32656611_R	32656611	A	P	0.1404	0.0969	7.32e-12	1.50807	1.04947	1.69613	0.0578	0.0558	0.537	0.87792	0.580561	1.32758	0.1004	0.0617	0.0458	0.49638	0.24854	1.64276	1.00928	2.67385	99	a	p	1.982e-11	+-+	36.8	0.04227	1.45761	1.30558	1.62735	0.160235	0.150632	0.519	1.05332	0.899874	1.23294	0.1006	0.0957	0.212	1.15437	0.921361	1.44632	0.1741	0.1336	0.000982	0.709
AA_DRB1_189_32656611_S	32656611	P	A	0.1398	0.0963	7.29e-12	1.5082	1.04949	1.69632	0.0562	0.0549	0.46	0.855559	0.565331	1.29478	0.0995	0.061	0.0482	0.491105	0.248584	1.63412	1.00389	2.66001		a	p	2.527e-11	-+-	41.9	0.03197	0.687289	0.615604	0.767323	0.152046	0.134861	0.153	1.12607	0.957292	1.3246	0.0998	0.095	0.21	1.15545	0.921758	1.4484	0.1699	0.1188	1.54e-05	0.629
AA_DRB1_231_32656010_P	32656010	P	A	0.0135	0.0175	0.0873	0.750932	0.910228	1.04283	0.0217	0.0203	0.513	0.800595	0.411068	1.55924	0.0191	0.0124	0.392	0.4506	0.5267	1.56925	0.558929	4.40584		a	p	0.129	++-	0	0.411	1.24533	0.938174	1.65305	NA	NA	NA	NA	NA	NA	0.0111	0.0173	0.215	0.694922	0.391037	1.23496	0.004274	0.004632	0.77	1.182
AA_DRB1_231_32656010_Q	32656010	A	P	0.0146	0.0191	0.0614	0.731901	0.902963	1.01505	0.0237	0.0215	0.619	0.845523	0.436098	1.63933	0.02	0.0138	0.417	0.4259	0.5245	1.53097	0.547649	4.27986	99	a	p	0.1093	--+	0	0.3985	0.794216	0.59903	1.053	0.0134187	0.0204703	0.0225	0.576476	0.352449	0.942901	0.0122	0.0181	0.252	0.717486	0.406394	1.26672	0.008547	0.01945	0.0163	2.509
AA_DRB1_233_32656004_R	32656004	P	A	0.2642	0.3371	2.22e-14	0.709908	0.970324	0.775153	0.2833	0.3329	0.00206	0.730811	0.59862	0.892194	0.3084	0.4204	0.00146	-0.4496	0.1412	0.637883	0.48367	0.841265		a	p	1.457e-18	+++	0	0.7243	1.41425	1.30915	1.52779	0.171861	0.227	2.49e-06	0.698983	0.600608	0.813471	0.314	0.4062	1.27e-09	0.647632	0.562882	0.745142	0.1806	0.2503	5.35e-05	1.474
AA_DRB1_233_32656004_T	32656004	A	P	0.2653	0.3387	1.92e-14	0.710298	0.970488	0.775306	0.2854	0.3342	0.00252	0.736313	0.603718	0.89803	0.3092	0.4218	0.00145	-0.4483	0.1408	0.638713	0.484679	0.8417	99	a	p	1.551e-18	---	0	0.7082	0.708291	0.655781	0.765006	0.17994	0.242677	1.46e-07	0.676742	0.583379	0.785046	0.3152	0.4071	1.52e-09	0.64939	0.564535	0.747	0.1848	0.2652	3.76e-06	1.549
AA_DRB1_-24_32665481_F	32665481	P	A	0.1421	0.1935	2.87e-12	0.675549	0.957745	0.754156	0.0663	0.1062	0.000164	0.521628	0.37184	0.731756	0.0715	0.1424	0.000462	-0.7873	0.2248	0.455072	0.292905	0.707023		a	p	4.269e-17	+++	13	0.1004	1.54759	1.39763	1.71364	0.186821	0.2285	0.00383	0.805507	0.694734	0.933941	0.0979	0.1482	0.000105	0.664955	0.541056	0.817227	0.172	0.2233	0.000442	1.41
AA_DRB1_-24_32665481_L	32665481	A	P	0.1434	0.1941	4.88e-12	0.67848	0.958216	0.757399	0.0673	0.107	0.00016	0.521055	0.371431	0.730952	0.0767	0.1448	0.000776	-0.7548	0.2246	0.470105	0.302699	0.730093	99	a	p	9.946e-17	---	7.1	0.1163	0.649599	0.586769	0.719157	0.194923	0.244344	0.000411	0.770593	0.665806	0.891872	0.0988	0.1494	9.58e-05	0.662946	0.539237	0.815036	0.1763	0.2378	3.18e-05	1.5
AA_DRB1_25_32660073	32660073	Q	R	0.0867	0.066	2.22e-06	1.42414	1.05314	1.64872	0.1198	0.1135	0.112	1.27456	0.945256	1.71858	0.0247	0.0372	0.204	-0.5048	0.3972	0.603626	0.277118	1.31484	99	q	r	3.026e-06	++-	15.7	0.09333	1.36193	1.1962	1.55062	NA	NA	NA	NA	NA	NA	0.0428	0.0472	0.883	1.02511	0.737565	1.42476	0.007479	0.002779	0.159	0.487
AA_DRB1_-25_32665484_K	32665484	A	P	0.4158	0.451	0.00059	0.870855	0.989153	0.942321	0.3592	0.4081	0.000337	0.706325	0.584043	0.854209	0.4271	0.4928	0.0834	-0.2364	0.1365	0.789465	0.604146	1.03163	99	a	p	1.279e-06	---	4.8	0.1222	0.840549	0.783437	0.901824	0.337749	0.380751	0.00103	0.816125	0.722372	0.922045	0.4239	0.5168	1.78e-07	0.701576	0.614168	0.801423	0.3697	0.3879	0.522	1.052
AA_DRB1_-25_32665484_R	32665484	P	A	0.4146	0.4503	0.000463	0.868402	0.988917	0.939778	0.3582	0.4074	0.000333	0.705661	0.583311	0.853674	0.4218	0.4903	0.065	-0.2544	0.1379	0.775382	0.591742	1.01601		a	p	8.202e-07	+++	5.4	0.1207	1.19387	1.11275	1.2809	0.329644	0.364956	0.00613	0.842188	0.744451	0.952757	0.423	0.5157	1.74e-07	0.70104	0.613586	0.800958	0.3665	0.3733	0.982	0.998
AA_DRB1_26_32660070_F	32660070	A	P	0.28	0.2825	0.727	0.984767	0.998676	1.07353	0.3033	0.3256	0.117	0.850526	0.694499	1.04161	0.3367	0.3955	0.1	-0.2225	0.1353	0.800515	0.614044	1.04361	99	a	p	0.1717	---	-17.3	0.1818	0.94838	0.878932	1.02332	0.299763	0.252166	0.000156	1.28769	1.12987	1.46756	0.3497	0.3946	0.0043	0.818057	0.7127	0.938989	0.2767	0.2473	0.037	0.835
AA_DRB1_26_32660070_L	32660070	P	A	0.1336	0.1645	2.31e-06	0.760994	0.969521	0.852312	0.1221	0.1558	0.0131	0.703913	0.533423	0.928895	0.1298	0.1699	0.142	-0.2713	0.1848	0.762388	0.530727	1.09517		a	p	3.586e-08	+++	0	0.876	1.3275	1.20028	1.46821	0.0969044	0.109844	0.284	0.899671	0.740671	1.0928	0.1388	0.1816	2.57e-05	0.666179	0.551349	0.804924	0.1026	0.1084	0.661	1.055
AA_DRB1_26_32660070_Y	32660070	P	A	0.1465	0.1181	2.64e-06	1.31033	1.03095	1.46676	0.181	0.1673	0.703	1.04879	0.820815	1.34009	0.2079	0.2263	0.529	-0.09705	0.15401	0.907511	0.671051	1.22729		a	p	6.634e-05	--+	40.2	0.03519	0.82078	0.744889	0.904403	0.202906	0.142324	8.33e-08	1.52715	1.30917	1.78142	0.2113	0.2135	0.776	1.0236	0.871407	1.20237	0.1741	0.139	0.00324	0.737
AA_DRB1_28_32660064_D	32660064	A	P	0.3484	0.3428	0.521	1.02701	1.00217	1.11412	0.3763	0.3973	0.559	0.943848	0.777682	1.14552	0.2713	0.3388	0.0226	-0.3247	0.1425	0.722744	0.546621	0.955615	99	a	p	0.811	+--	32.1	0.05264	0.991239	0.921899	1.06579	0.325324	0.284184	0.00122	1.2346	1.08684	1.40245	0.3228	0.3681	0.0187	0.84211	0.729746	0.971776	0.2959	0.2767	0.233	0.905
AA_DRB1_28_32660064_E	32660064	P	A	0.2269	0.2447	0.0289	0.901757	0.990455	0.989394	0.2469	0.2721	0.455	0.920756	0.741281	1.14368	0.154	0.2067	0.0544	-0.3312	0.1722	0.718062	0.512368	1.00633		a	p	0.006857	+++	0	0.4228	1.12075	1.03178	1.21739	0.123606	0.142508	0.126	0.872294	0.731576	1.04008	0.1864	0.2325	0.000616	0.7445	0.628821	0.881458	0.1229	0.1387	0.146	1.178
AA_DRB1_28_32660064_H	32660064	P	A	0.1214	0.0982	5.23e-05	1.28745	1.03141	1.45511	0.1297	0.1255	0.903	1.01772	0.768279	1.34813	0.118	0.1326	0.345	-0.185	0.1958	0.831104	0.566223	1.2199		a	p	0.0008337	--+	34.5	0.04721	0.832185	0.747142	0.926909	0.201768	0.141679	9.38e-08	1.52621	1.30787	1.781	0.1368	0.1359	0.437	1.07972	0.889882	1.31005	0.1731	0.138	0.00292	0.733
AA_DRB1_30_32660058_C	32660058	P	A	0.0535	0.0636	0.0213	0.821002	0.967421	0.971128	0.0246	0.0253	0.464	1.26339	0.675685	2.36228	0.006	0.009	0.516	-0.5001	0.7702	0.60647	0.13403	2.74421		a	p	0.03651	+-+	0	0.39	1.1878	1.01085	1.39572	0.039864	0.0503466	0.133	0.805965	0.605838	1.0722	0.0156	0.0172	0.0703	1.64209	0.959674	2.80978	0.0406	0.05697	0.0427	1.461
AA_DRB1_30_32660058_G	32660058	P	A	0.1215	0.0982	5.11e-05	1.28787	1.03146	1.45559	0.1297	0.1255	0.896	1.01901	0.76912	1.35009	0.118	0.1326	0.345	-0.1849	0.1958	0.831187	0.566279	1.22002		a	p	0.0008087	--+	34.4	0.04751	0.831853	0.746843	0.926538	0.201768	0.141679	9.38e-08	1.52621	1.30787	1.781	0.1368	0.1359	0.436	1.07983	0.889973	1.3102	0.1731	0.138	0.00292	0.733
AA_DRB1_30_32660058_H	32660058	P	A	0.0666	0.0835	0.000438	0.755625	0.957177	0.883364	0.076	0.1104	0.00318	0.606895	0.435514	0.845716	0.1054	0.1493	0.0796	-0.3488	0.1989	0.705534	0.477761	1.0419		a	p	1.845e-06	+++	0	0.4989	1.38168	1.20975	1.57805	0.051967	0.0547653	0.94	1.0103	0.774055	1.31865	0.113	0.1477	2.43e-06	0.611129	0.49798	0.749987	0.05876	0.04678	0.0993	0.764
AA_DRB1_30_32660058_L	32660058	P	A	0.0866	0.0659	2.27e-06	1.4236	1.05307	1.64807	0.1198	0.1135	0.112	1.27443	0.945161	1.71841	0.0235	0.0366	0.182	-0.5318	0.3987	0.587546	0.268944	1.28358		a	p	3.229e-06	--+	19.8	0.08261	0.734915	0.645486	0.836735	NA	NA	NA	NA	NA	NA	0.0428	0.0471	0.873	1.02721	0.73906	1.42771	0.007479	0.002779	0.159	0.487
AA_DRB1_30_32660058_R	32660058	P	A	0.0135	0.0175	0.0874	0.751	0.91026	1.0429	0.0221	0.0206	0.516	0.801957	0.411848	1.56158	0.0198	0.0125	0.332	0.5166	0.5322	1.67632	0.590662	4.75745		a	p	0.1368	++-	-93.1	0.355	1.24011	0.934059	1.64644	NA	NA	NA	NA	NA	NA	0.0111	0.0174	0.19	0.680156	0.382007	1.211	0.003205	0.004632	0.482	1.572
AA_DRB1_30_32660058_Y	32660058	A	P	0.3416	0.3286	0.133	1.06498	1.00519	1.1562	0.3709	0.3943	0.5	0.935326	0.770101	1.136	0.27	0.3381	0.0214	-0.3276	0.1424	0.720651	0.545145	0.952661	99	a	p	0.6318	+--	48.5	0.02053	1.01806	0.946288	1.09528	0.302608	0.254963	0.000169	1.28402	1.12758	1.46216	0.3177	0.3639	0.00969	0.827583	0.717024	0.955191	0.2831	0.2492	0.0207	0.819
AA_DRB1_31_32660055_F	32660055	A	P	0.1885	0.1792	0.242	1.06063	1.00582	1.17057	0.1758	0.171	0.885	1.01838	0.796557	1.30197	0.1423	0.1531	0.48	-0.1279	0.181	0.879941	0.61714	1.25465	99	a	p	0.3539	++-	0	0.5977	1.04279	0.954381	1.13939	0.246706	0.196757	6.72e-05	1.33031	1.15677	1.5299	0.1626	0.1697	0.37	1.08594	0.906827	1.30043	0.2169	0.1996	0.176	0.881
AA_DRB1_31_32660055_I	32660055	P	A	0.175	0.1618	0.0724	1.09787	1.00956	1.21559	0.1541	0.1507	0.681	1.05569	0.815222	1.36708	0.1232	0.1411	0.27	-0.2107	0.1911	0.810017	0.556963	1.17804		a	p	0.1346	--+	-68.5	0.3051	0.932301	0.850421	1.02206	0.241586	0.192024	4.43e-05	1.34316	1.1665	1.54657	0.1519	0.1527	0.171	1.13927	0.945254	1.37311	0.2137	0.195	0.138	0.87
AA_DRB1_31_32660055_V	32660055	P	A	0.0135	0.0175	0.0874	0.750992	0.910257	1.04289	0.0221	0.0205	0.529	0.807187	0.414534	1.57177	0.0199	0.0125	0.331	0.5175	0.5323	1.67783	0.591078	4.76267		a	p	0.139	++-	-92.8	0.3543	1.23862	0.932938	1.64447	NA	NA	NA	NA	NA	NA	0.0111	0.0174	0.189	0.679495	0.381627	1.20985	0.003205	0.004632	0.482	1.572
AA_DRB1_32_32660052	32660052	H	Y	0.2434	0.3068	7e-12	0.726701	0.971293	0.796123	0.2605	0.2813	0.0336	0.794772	0.643022	0.982334	0.2798	0.3684	0.00809	-0.3974	0.1501	0.672065	0.500776	0.901943	99	h	y	3.165e-14	---	0	0.6289	0.731835	0.675193	0.793228	0.166189	0.21436	2.65e-05	0.723589	0.62073	0.843492	0.2873	0.3349	0.000534	0.770522	0.664824	0.893025	0.1592	0.2385	2.29e-06	1.6
AA_DRB1_33_32660049	32660049	H	N	0.1421	0.1935	2.79e-12	0.67536	0.957708	0.753959	0.0666	0.1063	0.000167	0.521785	0.371879	0.732119	0.0727	0.1427	0.000544	-0.7773	0.2248	0.459645	0.295848	0.714129	99	h	n	4.574e-17	---	10	0.1083	0.646359	0.583728	0.71571	0.187148	0.228488	0.00418	0.807237	0.696288	0.935865	0.0988	0.1491	0.000118	0.667312	0.543105	0.819924	0.172	0.2233	0.000442	1.41
AA_DRB1_37_32660037_F	32660037	P	A	0.1407	0.1284	0.0594	1.11698	1.01281	1.25315	0.1753	0.1633	0.235	1.16836	0.903788	1.51038	0.0722	0.1175	0.00506	-0.6846	0.2442	0.504292	0.312475	0.813859		a	p	0.1202	--+	61.6	0.005494	0.921917	0.832096	1.02143	0.0520643	0.0583862	0.279	0.868862	0.672358	1.1228	0.0956	0.1008	0.882	1.01705	0.812919	1.27243	0.05556	0.0528	0.837	0.966
AA_DRB1_37_32660037_L	32660037	P	A	0.0665	0.0836	0.000362	0.751819	0.956268	0.879414	0.0778	0.1109	0.00581	0.631789	0.455873	0.875588	0.1058	0.1495	0.0812	-0.3463	0.1986	0.7073	0.479239	1.04389		a	p	2.142e-06	+++	0	0.6361	1.37878	1.20721	1.57474	0.0519357	0.0547666	0.944	1.00966	0.773556	1.31784	0.1134	0.1479	2.66e-06	0.612377	0.49902	0.751484	0.05876	0.04701	0.11	0.771
AA_DRB1_37_32660037_N	32660037	P	A	0.231	0.2416	0.824	0.989416	0.999003	1.08662	0.2375	0.2252	0.749	1.03675	0.830845	1.29368	0.2239	0.2578	0.263	-0.17	0.1518	0.843665	0.626549	1.13602		a	p	0.6971	+-+	0	0.5341	1.01664	0.935749	1.10452	0.263068	0.241856	0.15	1.10418	0.964924	1.26354	0.2485	0.2537	0.407	1.06671	0.915819	1.24247	0.2222	0.2754	0.0047	1.291
AA_DRB1_37_32660037_S	32660037	P	A	0.256	0.2384	0.141	1.07064	1.00623	1.1726	0.3287	0.2637	1.09e-05	1.58756	1.29202	1.95072	0.3746	0.2361	1.01e-05	0.6498	0.1472	1.91516	1.43518	2.55566		a	p	2.411e-05	---	82.7	9.367e-06	0.841727	0.777036	0.911802	0.285621	0.275872	0.463	1.05092	0.920488	1.19983	0.3135	0.1878	1.32e-13	1.87871	1.58987	2.22002	0.2927	0.2774	0.654	0.963
AA_DRB1_37_32660037_Y	32660037	P	A	0.3058	0.3081	0.641	0.979679	0.998229	1.06802	0.1824	0.2375	2.18e-05	0.594223	0.467294	0.75563	0.2274	0.2418	0.615	-0.07693	0.15275	0.925955	0.686383	1.24915		a	p	0.0523	+++	72.8	0.0006333	1.08069	0.9992	1.16883	0.347096	0.368905	0.138	0.911353	0.806035	1.03043	0.2328	0.3127	7.69e-06	0.70178	0.600925	0.819562	0.3707	0.3483	0.217	0.908
AA_DRB1_38_32660034_A	32660034	P	A	0.0135	0.0175	0.0896	0.752586	0.910936	1.04492	0.0221	0.0205	0.529	0.807429	0.414658	1.57224	0.0199	0.0125	0.333	0.5151	0.5322	1.67381	0.589776	4.75032		a	p	0.1415	++-	-94.9	0.3583	1.23677	0.93154	1.642	NA	NA	NA	NA	NA	NA	0.0114	0.0174	0.2	0.686107	0.385753	1.22032	0.003205	0.004863	0.405	1.702
AA_DRB1_38_32660034_L	32660034	P	A	0.0664	0.0835	0.000355	0.751496	0.956198	0.879053	0.0778	0.1109	0.00581	0.631852	0.455919	0.875675	0.1058	0.1495	0.0812	-0.3464	0.1986	0.70723	0.479191	1.04379		a	p	2.099e-06	+++	0	0.6379	1.3792	1.20757	1.57521	0.051975	0.0547664	0.939	1.0104	0.774137	1.31877	0.1134	0.1479	2.66e-06	0.612386	0.499027	0.751495	0.05876	0.04701	0.11	0.771
AA_DRB1_38_32660034_V	32660034	A	P	0.0799	0.101	5.43e-05	0.74349	0.958238	0.858578	0.0995	0.1312	0.00524	0.655996	0.487941	0.881932	0.1249	0.1614	0.191	-0.246	0.1879	0.781922	0.541028	1.13007	99	a	p	5.422e-07	---	0	0.7063	0.731835	0.647713	0.826883	0.0570944	0.0594996	0.97	0.995121	0.770858	1.28463	0.1241	0.1649	5.75e-07	0.603044	0.494576	0.7353	0.06197	0.05164	0.187	0.813
AA_DRB1_4_32665400_Q	32665400	P	A	0.2082	0.1643	1.68e-10	1.38071	1.03245	1.52437	0.2486	0.236	0.204	1.15073	0.926831	1.42873	0.1412	0.1689	0.139	-0.2663	0.18	0.766209	0.538429	1.09035		a	p	7.661e-09	--+	64.5	0.003598	0.773368	0.708773	0.84385	0.206746	0.146163	1.28e-07	1.50929	1.29648	1.75704	0.1791	0.1828	0.439	1.07152	0.899536	1.27638	0.1806	0.1413	0.0015	0.721
AA_DRB1_4_32665400_R	32665400	A	P	0.209	0.1648	1.25e-10	1.38381	1.03268	1.52779	0.2494	0.2365	0.202	1.15142	0.927206	1.42986	0.1451	0.1707	0.166	-0.24917	0.17999	0.779447	0.547742	1.10917	99	a	p	5.207e-09	++-	63	0.004492	1.2968	1.18849	1.41499	0.214819	0.162002	9.12e-06	1.40249	1.20875	1.62728	0.1798	0.1836	0.451	1.06963	0.897866	1.27426	0.1848	0.1559	0.0228	0.795
AA_DRB1_40_32660028	32660028	Y	F	0.0135	0.0175	0.0882	0.751586	0.910508	1.04366	0.0221	0.0205	0.529	0.807429	0.414658	1.57224	0.0199	0.0125	0.333	0.5151	0.5322	1.67381	0.589776	4.75032		f	y	0.1398	++-	-94.2	0.3571	1.238	0.932472	1.64364	NA	NA	NA	NA	NA	NA	0.0114	0.0174	0.2	0.686132	0.385767	1.22037	0.003205	0.004863	0.405	1.702
AA_DRB1_47_32660007	32660007	F	Y	0.3653	0.379	0.259	0.954078	0.996171	1.03521	0.4934	0.4723	0.152	1.14518	0.951143	1.3788	0.493	0.4679	0.145	0.2008	0.1377	1.22238	0.933241	1.6011	99	f	y	0.9586	-++	26.6	0.06566	0.998102	0.928828	1.07254	0.325752	0.345542	0.102	0.900672	0.794332	1.02125	0.4755	0.4453	0.615	0.964995	0.839942	1.10867	0.3622	0.3687	0.746	1.026
AA_DRB1_57_32659977_D	32659977	A	P	0.4989	0.452	1.74e-06	1.21514	1.01569	1.31618	0.4492	0.4644	0.279	0.898894	0.741194	1.09015	0.4124	0.4885	0.0177	-0.3191	0.1345	0.726803	0.558378	0.946031	99	a	p	0.0013	+--	79.3	6.364e-05	1.12367	1.0465	1.20653	0.500084	0.482022	0.155	1.09085	0.967727	1.22963	0.4733	0.5339	0.00018	0.767612	0.668406	0.881543	0.516	0.4314	2.19e-06	0.698
AA_DRB1_57_32659977_S	32659977	P	A	0.1931	0.1687	0.00181	1.17431	1.01635	1.29901	0.0835	0.0845	0.335	0.841642	0.59283	1.19488	0.1262	0.1069	0.298	0.2088	0.2007	1.2322	0.83146	1.82608		a	p	0.003714	-+-	-20.1	0.1891	0.86988	0.791773	0.955692	0.211095	0.245366	0.0108	0.833883	0.724528	0.959743	0.1413	0.1667	0.0815	0.846747	0.702193	1.02106	0.2436	0.2172	0.101	0.865
AA_DRB1_57_32659977_V	32659977	P	A	0.2745	0.2476	0.000589	1.16953	1.01409	1.27879	0.3266	0.3493	0.536	0.938024	0.766126	1.14849	0.2453	0.3176	0.0124	-0.36551	0.14621	0.693843	0.52096	0.924097		a	p	0.03595	-++	71.5	0.0008925	0.919339	0.84985	0.994511	0.257784	0.200051	1.12e-06	1.41409	1.23059	1.62494	0.2924	0.3306	0.00595	0.815717	0.705514	0.943133	0.2404	0.1878	0.000119	0.699
AA_DRB1_58_32659974	32659974	E	A	0.0331	0.048	0.000175	0.666184	0.917421	0.823658	0.0443	0.0742	0.0049	0.540263	0.351851	0.829567	0.0423	0.0632	0.212	-0.3762	0.3013	0.686465	0.380318	1.23905		a	e	1.828e-06	+++	0	0.6746	1.55379	1.29641	1.86228	0.0196479	0.032483	0.00165	0.530806	0.351372	0.801869	0.0352	0.0821	1.11e-08	0.395141	0.287352	0.543362	0.04274	0.03126	0.147	0.758
AA_DRB1_60_32659968_S	32659968	P	A	0.2744	0.2476	0.000593	1.16943	1.01408	1.27869	0.3266	0.3493	0.536	0.938024	0.766126	1.14849	0.2453	0.3176	0.0124	-0.36556	0.14621	0.693808	0.520934	0.924051		a	p	0.03609	-++	71.5	0.000894	0.919431	0.849934	0.994611	0.257956	0.200295	1.18e-06	1.41278	1.2296	1.62324	0.2924	0.3306	0.00596	0.815751	0.705546	0.943169	0.2404	0.1878	0.000119	0.699
AA_DRB1_60_32659968_Y	32659968	A	P	0.3059	0.2833	0.00834	1.12508	1.01037	1.22802	0.3661	0.3801	0.568	0.942707	0.76977	1.1545	0.2869	0.3821	0.00101	-0.4836	0.1471	0.61656	0.462127	0.822601	99	a	p	0.2179	+--	75.9	0.0002516	1.04991	0.971688	1.13442	0.288105	0.236498	5.26e-05	1.32112	1.15477	1.51142	0.3327	0.3678	0.0104	0.829172	0.71849	0.956906	0.2724	0.2145	4.99e-05	0.698
AA_DRB1_67_32659947_F	32659947	P	A	0.2003	0.1989	0.835	1.01046	1.00102	1.11431	0.227	0.2743	0.00303	0.709709	0.565711	0.890361	0.2384	0.3267	0.00171	-0.4644	0.148	0.628512	0.470255	0.840028		a	p	0.06196	-++	73.7	0.0005032	1.08513	0.995861	1.1824	0.295275	0.231292	2.21e-06	1.38281	1.20947	1.58098	0.2667	0.3271	9.12e-06	0.713123	0.614191	0.827991	0.2756	0.2288	0.0013	0.754
AA_DRB1_67_32659947_I	32659947	P	A	0.4881	0.421	7.74e-14	1.36065	1.02518	1.47508	0.5192	0.4477	6.26e-06	1.56618	1.28916	1.90273	0.4117	0.2802	1.66e-05	0.6086	0.1413	1.83786	1.39327	2.42431		a	p	3.13e-21	---	25.6	0.06813	0.706381	0.657354	0.759065	0.387668	0.393914	0.55	0.963848	0.854155	1.08763	0.4157	0.3239	1.12e-07	1.48684	1.2842	1.72146	0.4359	0.3988	0.0283	0.843
AA_DRB1_67_32659947_L	32659947	P	A	0.3118	0.3801	1.11e-14	0.716484	0.972197	0.779716	0.2547	0.2785	0.0248	0.778411	0.62548	0.968735	0.3516	0.3942	0.15	-0.1949	0.1353	0.822917	0.631228	1.07282		a	p	5.77e-16	+++	0	0.5224	1.36643	1.26686	1.47382	0.31696	0.374568	0.000242	0.794788	0.702494	0.899208	0.3189	0.3498	0.329	0.931452	0.807665	1.07421	0.2906	0.3729	7.47e-07	1.507
AA_DRB1_70_32659938_D	32659938	P	A	0.4283	0.4272	0.461	1.03019	1.00236	1.11499	0.3807	0.4383	0.0225	0.803402	0.665696	0.969595	0.4066	0.4002	0.861	0.02319	0.13198	1.02346	0.790183	1.32561		a	p	0.8805	-+-	30.5	0.05619	1.00541	0.937285	1.0785	0.295022	0.317419	0.0753	0.891835	0.785839	1.01213	0.3913	0.4495	0.00114	0.797788	0.696248	0.914137	0.3344	0.3307	0.558	0.954
AA_DRB1_70_32659938_Q	32659938	P	A	0.3829	0.3948	0.0922	0.933	0.994418	1.01143	0.4134	0.3666	0.00966	1.28801	1.06332	1.56019	0.4092	0.3757	0.161	0.1946	0.1388	1.21482	0.925475	1.59464		a	p	0.8738	+--	65.1	0.003227	1.00582	0.936191	1.08062	0.449152	0.481396	0.0661	0.894861	0.79477	1.00756	0.41	0.3453	0.00185	1.24841	1.08567	1.43556	0.4412	0.4768	0.0129	1.213
AA_DRB1_70_32659938_R	32659938	P	A	0.1888	0.1779	0.235	1.06331	1.00624	1.17662	0.2067	0.1955	0.761	0.963262	0.757163	1.22546	0.1856	0.2252	0.0596	-0.3142	0.1668	0.730373	0.526698	1.01281		a	p	0.6726	-++	17.9	0.08739	0.980787	0.89658	1.0729	0.25575	0.201131	3.14e-05	1.34519	1.1705	1.54595	0.2001	0.2063	0.759	1.02686	0.866852	1.21641	0.2254	0.1927	0.0139	0.794
AA_DRB1_71_32659935_A	32659935	P	A	0.1623	0.1179	3.34e-10	1.42905	1.04057	1.59743	0.2709	0.191	2.46e-07	1.81557	1.44748	2.27727	0.2423	0.1319	1.9e-05	0.7581	0.17728	2.13422	1.50777	3.02094		a	p	1.528e-18	---	44	0.02806	0.650054	0.590527	0.715581	0.214523	0.186956	0.0315	1.17545	1.01497	1.3613	0.2219	0.1025	4.1e-14	2.19144	1.78799	2.68592	0.2244	0.1813	0.00969	0.78
AA_DRB1_71_32659935_E	32659935	P	A	0.078	0.1099	1.18e-05	0.72354	0.954234	0.836244	0.0494	0.0527	0.709	0.921558	0.600137	1.41512	0.0177	0.0321	0.163	-0.6835	0.4901	0.504847	0.193187	1.31929		a	p	9.652e-06	+++	0	0.4273	1.35866	1.1861	1.55633	0.0376172	0.0707857	2.82e-07	0.498885	0.376632	0.660821	0.0323	0.0364	0.445	1.15426	0.798907	1.66768	0.03632	0.1088	1.57e-09	3.101
AA_DRB1_71_32659935_K	32659935	P	A	0.0328	0.0251	0.00328	1.42936	1.0888	1.81374	0.0609	0.0565	0.944	0.984964	0.647568	1.49815	0.0896	0.0969	0.975	-0.007867	0.24747	0.992164	0.610847	1.61151		a	p	0.02108	-++	-20.1	0.1893	0.799235	0.660597	0.96697	0.0205523	0.0124785	0.0187	1.74664	1.10236	2.76748	0.0793	0.0857	0.343	0.888844	0.696734	1.13392	0.01282	0.01181	0.811	0.921
AA_DRB1_71_32659935_R	32659935	A	P	0.2732	0.2528	0.00222	1.1524	1.01298	1.26205	0.3799	0.2995	1.1e-05	1.57098	1.2843	1.92166	0.3482	0.2598	0.000666	0.5143	0.1511	1.67247	1.24377	2.24893	99	a	p	9.178e-08	+++	65.8	0.002865	1.24297	1.14766	1.34618	0.272543	0.270215	0.906	0.992098	0.869421	1.13208	0.3321	0.2237	4.59e-09	1.60218	1.36854	1.87571	0.2714	0.3015	0.0801	1.162
AA_DRB1_73_32659929	32659929	G	A	0.1116	0.0857	7.89e-08	1.43453	1.04867	1.63649	0.1727	0.1576	0.0827	1.26276	0.970135	1.64365	0.1119	0.1299	0.517	-0.141	0.2178	0.868489	0.566721	1.33094		a	g	1.936e-07	--+	22.5	0.0756	0.739634	0.660285	0.828519	NA	NA	NA	NA	NA	NA	0.1179	0.1251	0.714	0.962332	0.783953	1.1813	0.01068	0.003937	0.103	0.501
AA_DRB1_74_32659926_A	32659926	A	P	0.4783	0.441	0.000184	1.16399	1.01216	1.2604	0.4325	0.4382	0.382	0.918338	0.758712	1.11155	0.4154	0.4769	0.0234	-0.3	0.1323	0.740818	0.571604	0.960125	99	a	p	0.01731	+--	71.9	0.0008124	1.08959	1.01516	1.16948	0.46694	0.412797	0.000182	1.25371	1.11352	1.41153	0.4446	0.4714	0.881	1.01066	0.879903	1.16084	0.4391	0.3944	0.0132	0.825
AA_DRB1_74_32659926_E	32659926	P	A	0.2209	0.2454	0.000583	0.844593	0.983874	0.929931	0.1993	0.2233	0.0222	0.756691	0.595875	0.960909	0.2048	0.287	0.000347	-0.5826	0.1628	0.558445	0.405884	0.768348		a	p	1.177e-06	+++	36	0.0439	1.23763	1.13559	1.34884	0.294179	0.259513	0.00542	1.20528	1.05703	1.37432	0.2231	0.2479	0.52	0.948354	0.806884	1.11463	0.2532	0.2585	0.784	1.025
AA_DRB1_74_32659926_L	32659926	P	A	0.146	0.11	7.71e-08	1.36845	1.03654	1.53432	0.0616	0.0581	0.567	0.889318	0.594823	1.32962	0.1001	0.0612	0.0441	0.501164	0.248931	1.65064	1.01335	2.68873		a	p	9.678e-08	-+-	17.1	0.0897	0.746694	0.67065	0.83136	0.167242	0.149591	0.131	1.12872	0.965128	1.32005	0.1049	0.0991	0.114	1.19603	0.95775	1.4936	0.1784	0.1329	0.000412	0.694
AA_DRB1_74_32659926_Q	32659926	P	A	0.0867	0.066	2.31e-06	1.42323	1.05303	1.64764	0.1198	0.1134	0.11	1.27634	0.94658	1.72099	0.0234	0.0366	0.176	-0.5397	0.3989	0.582923	0.266723	1.27398		a	p	3.257e-06	--+	20.9	0.0799	0.734989	0.64555	0.836819	NA	NA	NA	NA	NA	NA	0.0432	0.0476	0.865	1.02898	0.740514	1.42981	0.009615	0.003011	0.062	0.421
AA_DRB1_74_32659926_R	32659926	P	A	0.0249	0.0197	0.0224	1.35631	1.08296	1.76169	0.0533	0.0445	0.575	1.13451	0.730078	1.76298	0.0893	0.0939	0.895	0.03268	0.24815	1.03322	0.635277	1.68044		a	p	0.03588	---	0	0.5635	0.803723	0.655254	0.985833	NA	NA	NA	NA	NA	NA	0.0753	0.078	0.584	0.932175	0.72492	1.19869	0.002137	0.001158	0.803	0.807
AA_DRB1_77_32659917	32659917	N	T	0.0249	0.0197	0.0225	1.35591	1.08288	1.7612	0.0533	0.0445	0.575	1.13428	0.729932	1.76262	0.0893	0.0939	0.897	0.0322	0.2482	1.03272	0.63491	1.6798		t	n	0.03615	---	0	0.5634	0.803965	0.655451	0.986129	NA	NA	NA	NA	NA	NA	0.0753	0.0779	0.585	0.932303	0.725027	1.19884	0.002137	0.001158	0.803	0.807
AA_DRB1_78_32659914	32659914	V	Y	0.208	0.1641	1.66e-10	1.38129	1.03252	1.52516	0.2488	0.2385	0.216	1.14671	0.923231	1.42429	0.14	0.1686	0.129	-0.2732	0.18	0.760941	0.534726	1.08285	99	v	y	8.716e-09	++-	65.4	0.003087	1.29214	1.18421	1.4099	0.206991	0.144252	4.07e-08	1.53362	1.3174	1.78533	0.1796	0.1831	0.433	1.07247	0.900496	1.2773	0.1827	0.1408	0.000863	0.71
AA_DRB1_85_32659893	32659893	A	V	0.0664	0.0834	0.000366	0.752007	0.956305	0.879634	0.0776	0.1107	0.00577	0.631031	0.455059	0.875052	0.1059	0.1489	0.083	-0.3444	0.1987	0.708645	0.480056	1.04608	99	a	v	2.206e-06	---	0	0.6329	0.725496	0.635217	0.828605	0.052008	0.0549348	0.943	1.00979	0.773771	1.31781	0.1136	0.148	2.95e-06	0.614173	0.500628	0.75347	0.0609	0.04748	0.077	0.752
AA_DRB1_86_32659890	32659890	V	G	0.355	0.3624	0.0983	0.932702	0.994262	1.01301	0.4589	0.4354	0.375	1.0892	0.901849	1.31546	0.4673	0.5044	0.28	-0.1458	0.1349	0.864331	0.663515	1.12592		g	v	0.1581	+-+	-48.4	0.2597	1.0538	0.979889	1.13328	0.312338	0.290622	0.0702	1.12601	0.990446	1.28013	0.4164	0.4267	0.257	0.921618	0.800401	1.06119	0.2949	0.2788	0.574	0.955
AA_DRB1_9_32660121_E	32660121	A	P	0.4421	0.3555	1.48e-19	1.43943	1.02942	1.55869	0.5744	0.4853	2.56e-08	1.70033	1.41057	2.04961	0.5024	0.3657	0.000108	0.5312	0.1372	1.70097	1.2999	2.22579	99	a	p	1.481e-28	+++	-12	0.1676	1.49123	1.38963	1.60025	0.475728	0.390646	3.41e-08	1.38996	1.23604	1.56304	0.4781	0.3349	2.23e-15	1.7667	1.53482	2.03361	0.4605	0.3886	0.000193	0.749
AA_DRB1_9_32660121_K	32660121	P	A	0.1216	0.0984	5.45e-05	1.28634	1.03128	1.45369	0.129	0.1226	0.875	1.02292	0.771799	1.35575	0.1182	0.1328	0.346	-0.1846	0.1958	0.831437	0.566449	1.22039		a	p	0.0008126	--+	33.2	0.05017	0.831936	0.747064	0.926449	0.202771	0.142743	9.83e-08	1.52571	1.30727	1.78066	0.1366	0.1359	0.444	1.07839	0.888797	1.30843	0.1731	0.138	0.00292	0.733
AA_DRB1_9_32660121_W	32660121	P	A	0.3205	0.2571	1.67e-12	1.3612	1.02675	1.48288	0.4457	0.3628	1.13e-08	1.75453	1.44658	2.12804	0.3847	0.2333	2.67e-06	0.691	0.1472	1.99571	1.49554	2.66316		a	p	3.277e-22	---	62.1	0.005123	0.688321	0.638292	0.742272	0.273443	0.248086	0.0695	1.13319	0.990346	1.29664	0.3417	0.1993	1.65e-16	1.95407	1.6664	2.29139	0.2874	0.2503	0.0665	0.853
AA_DRB1_96_32657590_E	32657590	P	A	0.0534	0.0635	0.02	0.81887	0.966912	0.969043	0.0246	0.0245	0.451	1.27176	0.681227	2.3742	0.0059	0.0074	0.581	-0.4402	0.7972	0.643908	0.134969	3.07195		a	p	0.03614	+-+	0	0.3878	1.18875	1.01126	1.39738	0.0399437	0.0503681	0.136	0.806931	0.606601	1.07342	0.0156	0.0168	0.0596	1.67775	0.979316	2.87428	0.04167	0.0572	0.0518	1.434
AA_DRB1_96_32657590_H	32657590	A	P	0.3889	0.4022	0.0489	0.922664	0.993573	0.999615	0.4109	0.3732	0.0223	1.25484	1.03279	1.52464	0.4534	0.3505	0.0021	0.4138	0.1346	1.51255	1.16182	1.96918	99	a	p	0.9318	-++	78.4	9.409e-05	0.996905	0.928259	1.07063	0.461202	0.478582	0.361	0.946233	0.840425	1.06536	0.4076	0.3168	3.34e-06	1.38856	1.2091	1.59467	0.4551	0.4757	0.102	1.134
AA_DRB1_96_32657590_Q	32657590	P	A	0.1933	0.1452	4.75e-10	1.38611	1.03412	1.53612	0.3218	0.2411	1.64e-06	1.67364	1.35594	2.06577	0.3754	0.1999	3.43e-08	0.8258	0.1497	2.28371	1.70299	3.06244		a	p	2.244e-19	---	64.3	0.003713	0.66731	0.611094	0.728698	0.234955	0.199045	0.00912	1.20886	1.04878	1.39337	0.2907	0.1514	9.79e-16	2.038	1.71288	2.42482	0.2436	0.1955	0.00504	0.771
AA_DRB1_96_32657590_Y	32657590	P	A	0.1422	0.1934	2.83e-12	0.674968	0.957573	0.75367	0.0653	0.108	7.41e-05	0.500874	0.355788	0.705125	0.0734	0.1442	0.000562	-0.7714	0.2236	0.462365	0.2983	0.716667		a	p	2.866e-17	+++	19.5	0.08344	1.55302	1.40226	1.71999	0.186114	0.228403	0.00313	0.801321	0.690867	0.929434	0.0987	0.1485	0.000132	0.668836	0.544215	0.821994	0.1731	0.2237	0.00052	1.403
AA_DRB1_98_32657584_E	32657584	P	A	0.3501	0.3574	0.602	0.978338	0.998199	1.06226	0.3137	0.3463	0.177	0.873454	0.717849	1.06279	0.2126	0.3122	0.000194	-0.5793	0.1554	0.56029	0.413175	0.759788		a	p	0.06075	+++	67.9	0.001951	1.07304	0.996809	1.15511	0.393088	0.372704	0.0639	1.12108	0.993502	1.26504	0.2777	0.3312	0.0328	0.852038	0.735565	0.986953	0.3536	0.3643	0.526	1.052
AA_DRB1_98_32657584_K	32657584	A	P	0.3502	0.3575	0.601	0.978279	0.998194	1.0622	0.3138	0.3464	0.178	0.873716	0.717924	1.06332	0.2127	0.3124	0.000191	-0.5799	0.1555	0.559954	0.412846	0.759481	99	a	p	0.06085	---	68	0.001948	0.932021	0.865805	1.0033	0.393889	0.373738	0.0656	1.12045	0.992761	1.26456	0.2778	0.3313	0.033	0.852216	0.735707	0.987177	0.3536	0.3643	0.526	1.052
[truncated: 7 more columns]

## Sheet: ST4(excerpt)
SNP	BP	A1	A2	FAKR	FUKR	PKR	ORKR	LCIKR	UCIKR	FAHC	FUHC	PHC	ORHC	LCIHC	UCIHC	FAMC	FUMC	P	Estimate	SE	ORMC	LCIMC	UCIMC	MEtaDisc	Allele1	Allele2	Pmeta_dis	Direction	HetISq	HetPVal	OR_disc	LCI_disc	UCI_disc	FAJap1	FUJap1	PJap1	ORJap1	LCIJap1	UCIJap1	FATQ	FUTQ	P_TQ	ORTQ	LCITQ	UCITQ	FAJap2	FUJap2	PJap2	ORJap2
AA_A_70_30018720	30018720	Q	H	0.202	0.1691	1.15e-06	1.28685	1.02596	1.42448	0.3471	0.3164	0.0242	1.26504	1.03115	1.55197	0.4166	0.3854	0.166	0.1895	0.1367	1.20865	0.924565	1.58001		h	q	3.373e-08	---	0	0.9092	0.784507	0.719686	0.855166	0.107032	0.0953804	0.157	1.15219	0.947642	1.40089	0.3917	0.3424	0.758	1.02293	0.885613	1.18155	0.1218	0.09518	0.0292	0.771
AA_B_9_31432689_D	31432689	P	A	0.0076	0.002	2.32e-06	4.06409	2.26124	7.27232	0.017	0.0108	0.27	1.59026	0.696798	3.62937	0.0023	0.0036	0.628	-0.6332	1.3078	0.53089	0.0409056	6.89012		a	p	1.483e-05	--+	20	0.08221	0.355866	0.222939	0.568051	NA	NA	NA	NA	NA	NA	0.0057	0.0055	0.599	1.29549	0.493347	3.40184	NA	NA	NA	NA
AA_B_9_31432689_H	31432689	P	A	0.2085	0.1833	0.000996	1.17651	1.01586	1.29607	0.203	0.195	0.838	1.02556	0.805106	1.30638	0.2533	0.2223	0.161	0.2172	0.1549	1.24259	0.917224	1.68338		a	p	0.0006701	---	0	0.529	0.861138	0.789986	0.938699	0.233881	0.183944	0.000236	1.31051	1.1352	1.51288	0.2455	0.2738	0.0123	0.820283	0.702449	0.957884	NA	NA	NA	NA
AA_B_9_31432689_Y	31432689	A	P	0.2161	0.1853	6.28e-05	1.21619	1.01894	1.33855	0.2199	0.2055	0.594	1.06684	0.841097	1.35317	0.2543	0.2247	0.182	0.2064	0.1545	1.22924	0.908083	1.66399	99	a	p	3.648e-05	+++	0	0.5957	1.19686	1.09904	1.30338	0.233881	0.183944	0.000236	1.31051	1.1352	1.51288	0.2501	0.2784	0.0155	0.826219	0.707923	0.964283	NA	NA	NA	NA
AA_DPB1_35_33156517_F	33156517	A	P	0.5207	0.4587	1.16e-10	1.29997	1.02115	1.40795	0.4706	0.4396	0.608	1.05247	0.8655	1.27983	0.6365	0.6044	0.11	0.2316	0.1447	1.26062	0.949317	1.67399	99	a	p	1.955e-10	+++	-4.2	0.1466	1.26137	1.17429	1.35492	0.495024	0.443028	2.85e-05	1.28891	1.14409	1.45205	0.6243	0.6067	0.287	0.924113	0.799226	1.06852	0.4872	0.4194	0.000288	0.759
AA_DPB1_35_33156517_L	33156517	P	A	0.4419	0.3961	3.36e-06	1.21091	1.01557	1.3127	0.4064	0.3838	0.593	1.05778	0.86079	1.29984	0.509	0.5108	0.813	-0.03288	0.13894	0.967655	0.736974	1.27054		a	p	1.739e-05	--+	-14.9	0.1754	0.853167	0.793486	0.917337	0.467788	0.426919	0.000611	1.23141	1.09302	1.38732	0.5069	0.5411	0.0751	0.878865	0.762359	1.01318	0.4626	0.4027	0.000944	0.776
AA_DPB1_35_33156517_Y	33156517	P	A	0.0789	0.0628	0.000154	1.34017	1.04541	1.55966	0.0654	0.0597	0.834	0.958381	0.643256	1.42788	0.1281	0.0939	0.00413	0.6693	0.2334	1.95287	1.23595	3.08566		a	p	3.238e-05	-+-	24.7	0.07021	0.750437	0.655383	0.859277	0.0272179	0.0160953	0.00727	1.74961	1.16857	2.61954	0.1188	0.068	0.21	1.1769	0.912434	1.51802	0.02457	0.01691	0.207	0.724
AA_DQB1_37_32740726_D	32740726	P	A	0.1126	0.0935	0.002	1.21809	1.02499	1.38045	0.0715	0.0754	0.423	0.855901	0.585063	1.25212	0.1247	0.064	0.00234	0.7824	0.2571	2.18671	1.32113	3.61943		a	p	0.0009264	-+-	52.9	0.01438	0.822423	0.732611	0.923246	0.168253	0.209746	0.000446	0.7661	0.658921	0.890714	0.107	0.099	0.0974	1.21867	0.964551	1.53973	0.2094	0.189	0.217	0.89
AA_DQB1_37_32740726_I	32740726	P	A	0.1068	0.0796	1.49e-08	1.47465	1.05361	1.68684	0.1558	0.1412	0.104	1.2547	0.954171	1.6499	0.1109	0.1219	0.747	-0.07265	0.22471	0.929926	0.598648	1.44453		a	p	3.639e-08	--+	10.7	0.1065	0.721084	0.641835	0.810117	NA	NA	NA	NA	NA	NA	0.1096	0.1218	0.291	0.892567	0.72284	1.10215	0.002137	0.00139	0.861	0.859
AA_DQB1_37_32740726_Y	32740726	A	P	0.2194	0.1731	1.81e-10	1.36977	1.0309	1.50885	0.2271	0.2164	0.374	1.11249	0.879498	1.4072	0.2355	0.1855	0.0374	0.3771	0.1812	1.45805	1.02219	2.07976	99	a	p	5.567e-11	+++	-41.8	0.2441	1.33643	1.22552	1.45737	0.172612	0.212982	0.000679	0.774022	0.666474	0.898924	0.2165	0.2206	0.711	1.03216	0.873279	1.21995	0.2105	0.1904	0.237	0.894
AA_DRB1_11_32660115_D	32660115	P	A	0.1216	0.0984	5.46e-05	1.28634	1.03128	1.45372	0.1291	0.1227	0.885	1.02097	0.770523	1.35281	0.1183	0.1328	0.346	-0.1844	0.1958	0.831603	0.566562	1.22063		a	p	0.0008299	--+	33.5	0.04947	0.832269	0.747363	0.92682	0.203088	0.142699	8.46e-08	1.52874	1.30994	1.78409	0.1367	0.136	0.446	1.0781	0.888539	1.3081	0.1731	0.138	0.00292	0.733
AA_DRB1_11_32660115_G	32660115	P	A	0.0866	0.0659	2.2e-06	1.4242	1.05314	1.64876	0.1198	0.1135	0.114	1.27278	0.943933	1.71618	0.0234	0.0365	0.179	-0.5353	0.3987	0.585494	0.268004	1.27909		a	p	3.231e-06	--+	20.6	0.08052	0.734915	0.645486	0.836735	NA	NA	NA	NA	NA	NA	0.0426	0.0471	0.891	1.02328	0.736148	1.4224	0.007479	0.002779	0.159	0.487
AA_DRB1_11_32660115_L	32660115	P	A	0.0536	0.0636	0.0221	0.822029	0.967635	0.972285	0.0257	0.0292	0.525	1.20949	0.672587	2.17499	0.006	0.0091	0.514	-0.5033	0.7705	0.604532	0.133523	2.73705		a	p	0.03724	+-+	0	0.4218	1.18602	1.01013	1.39253	0.0398646	0.0503466	0.134	0.805976	0.605847	1.07221	0.0154	0.0171	0.0691	1.64589	0.961709	2.81682	0.0406	0.05697	0.0427	1.461
AA_DRB1_11_32660115_P	32660115	P	A	0.1803	0.1277	4.5e-13	1.48544	1.04331	1.65342	0.3009	0.2208	2.82e-07	1.76138	1.41922	2.18604	0.3566	0.1886	7.28e-08	0.8288	0.1539	2.29057	1.69411	3.09703		a	p	1.716e-23	---	50.2	0.01799	0.627445	0.572563	0.687586	0.22965	0.194304	0.00723	1.21838	1.05542	1.4065	0.2842	0.1358	1.57e-17	2.19347	1.83094	2.62779	0.2393	0.1906	0.00361	0.762
AA_DRB1_11_32660115_S	32660115	P	A	0.4024	0.4335	0.00269	0.885963	0.990472	0.958857	0.3382	0.3889	0.000649	0.716491	0.591556	0.867812	0.4066	0.4802	0.0446	-0.2748	0.1368	0.759724	0.581044	0.99335		a	p	8.188e-06	+++	16.3	0.0916	1.1741	1.09411	1.25993	0.332626	0.376024	0.00119	0.817618	0.723385	0.924127	0.4131	0.4997	9.78e-07	0.719349	0.630476	0.82075	0.3643	0.3837	0.496	1.055
AA_DRB1_11_32660115_V	32660115	P	A	0.1555	0.211	3.25e-13	0.674705	0.959195	0.750061	0.0882	0.1267	0.000154	0.549965	0.4035	0.749597	0.0911	0.1546	0.00364	-0.59831	0.20574	0.54974	0.367306	0.822786		a	p	9.636e-18	+++	-78	0.3251	1.53036	1.38858	1.6866	0.191972	0.233238	0.00341	0.804781	0.694992	0.931913	0.1093	0.1661	4.04e-05	0.66549	0.547899	0.808319	0.1752	0.2279	0.000317	1.419
AA_DRB1_13_32660109_F	32660109	P	A	0.1885	0.1793	0.245	1.06031	1.00579	1.17019	0.1757	0.1709	0.889	1.01762	0.795656	1.30151	0.1431	0.1536	0.488	-0.1256	0.1811	0.881968	0.618439	1.25779		a	p	0.3559	--+	0	0.6056	0.959157	0.877839	1.04801	0.246705	0.196757	6.72e-05	1.33031	1.15677	1.52989	0.1625	0.1697	0.37	1.086	0.906883	1.3005	0.2169	0.1996	0.176	0.881
AA_DRB1_13_32660109_G	32660109	P	A	0.2138	0.1887	0.00448	1.15321	1.01411	1.27232	0.1481	0.1747	0.00695	0.694613	0.533125	0.905018	0.2185	0.2338	0.608	-0.08223	0.1602	0.92106	0.672857	1.26082		a	p	0.131	-++	70	0.001263	0.934167	0.855135	1.0205	0.203437	0.188732	0.171	1.10757	0.957368	1.28133	0.2242	0.2529	0.00637	0.801325	0.68344	0.939543	0.2265	0.1658	3.9e-06	0.643
AA_DRB1_13_32660109_H	32660109	P	A	0.1421	0.1935	2.78e-12	0.675353	0.957707	0.753952	0.0665	0.1064	0.000157	0.520482	0.37095	0.730291	0.0725	0.1427	0.000528	-0.7791	0.2248	0.458819	0.295316	0.712844		a	p	4.332e-17	+++	11.2	0.1051	1.54759	1.39763	1.71364	0.187148	0.228487	0.00418	0.807238	0.696289	0.935867	0.0987	0.1491	0.000112	0.666214	0.542176	0.81863	0.172	0.2233	0.000442	1.41
AA_DRB1_13_32660109_R	32660109	P	A	0.1803	0.1276	4.63e-13	1.48508	1.04327	1.65299	0.3009	0.2208	2.82e-07	1.76138	1.41922	2.18604	0.3567	0.1886	7.21e-08	0.8291	0.1539	2.29126	1.69462	3.09796		a	p	1.755e-23	---	50.4	0.0178	0.62757	0.572678	0.687724	0.229416	0.194279	0.00756	1.21714	1.05429	1.40515	0.2843	0.1358	1.35e-17	2.19761	1.83426	2.63294	0.2393	0.1906	0.00361	0.762
AA_DRB1_13_32660109_S	32660109	P	A	0.1879	0.244	1.7e-10	0.718191	0.966926	0.795	0.1905	0.2149	0.0689	0.801476	0.63139	1.01738	0.1883	0.2466	0.0478	-0.33976	0.1717	0.711941	0.508499	0.996777		a	p	6.131e-12	+++	0	0.7017	1.37163	1.25338	1.50104	0.128692	0.187347	7.11e-09	0.617628	0.522134	0.730588	0.1888	0.2461	0.000957	0.756207	0.640653	0.892605	0.1378	0.2179	2.6e-07	1.729
AA_DRB1_13_32660109_Y	32660109	P	A	0.0866	0.0659	2.19e-06	1.42427	1.05314	1.64884	0.1198	0.1135	0.113	1.27379	0.944689	1.71755	0.0234	0.0365	0.18	-0.5346	0.3987	0.585904	0.268192	1.27999		a	p	3.182e-06	--+	20.4	0.08097	0.734768	0.645357	0.836568	NA	NA	NA	NA	NA	NA	0.0427	0.0472	0.88	1.02578	0.738004	1.42578	0.007479	0.002779	0.159	0.487
AA_DRB1_26_32660070_F	32660070	A	P	0.28	0.2825	0.727	0.984767	0.998676	1.07353	0.3033	0.3256	0.117	0.850526	0.694499	1.04161	0.3367	0.3955	0.1	-0.2225	0.1353	0.800515	0.614044	1.04361	99	a	p	0.1717	---	-17.3	0.1818	0.94838	0.878932	1.02332	0.299763	0.252166	0.000156	1.28769	1.12987	1.46756	0.3497	0.3946	0.0043	0.818057	0.7127	0.938989	0.2767	0.2473	0.037	0.835
AA_DRB1_26_32660070_L	32660070	P	A	0.1336	0.1645	2.31e-06	0.760994	0.969521	0.852312	0.1221	0.1558	0.0131	0.703913	0.533423	0.928895	0.1298	0.1699	0.142	-0.2713	0.1848	0.762388	0.530727	1.09517		a	p	3.586e-08	+++	0	0.876	1.3275	1.20028	1.46821	0.0969044	0.109844	0.284	0.899671	0.740671	1.0928	0.1388	0.1816	2.57e-05	0.666179	0.551349	0.804924	0.1026	0.1084	0.661	1.055
AA_DRB1_26_32660070_Y	32660070	P	A	0.1465	0.1181	2.64e-06	1.31033	1.03095	1.46676	0.181	0.1673	0.703	1.04879	0.820815	1.34009	0.2079	0.2263	0.529	-0.09705	0.15401	0.907511	0.671051	1.22729		a	p	6.634e-05	--+	40.2	0.03519	0.82078	0.744889	0.904403	0.202906	0.142324	8.33e-08	1.52715	1.30917	1.78142	0.2113	0.2135	0.776	1.0236	0.871407	1.20237	0.1741	0.139	0.00324	0.737
AA_DRB1_37_32660037_F	32660037	P	A	0.1407	0.1284	0.0594	1.11698	1.01281	1.25315	0.1753	0.1633	0.235	1.16836	0.903788	1.51038	0.0722	0.1175	0.00506	-0.6846	0.2442	0.504292	0.312475	0.813859		a	p	0.1202	--+	61.6	0.005494	0.921917	0.832096	1.02143	0.0520643	0.0583862	0.279	0.868862	0.672358	1.1228	0.0956	0.1008	0.882	1.01705	0.812919	1.27243	0.05556	0.0528	0.837	0.966
AA_DRB1_37_32660037_L	32660037	P	A	0.0665	0.0836	0.000362	0.751819	0.956268	0.879414	0.0778	0.1109	0.00581	0.631789	0.455873	0.875588	0.1058	0.1495	0.0812	-0.3463	0.1986	0.7073	0.479239	1.04389		a	p	2.142e-06	+++	0	0.6361	1.37878	1.20721	1.57474	0.0519357	0.0547666	0.944	1.00966	0.773556	1.31784	0.1134	0.1479	2.66e-06	0.612377	0.49902	0.751484	0.05876	0.04701	0.11	0.771
AA_DRB1_37_32660037_N	32660037	P	A	0.231	0.2416	0.824	0.989416	0.999003	1.08662	0.2375	0.2252	0.749	1.03675	0.830845	1.29368	0.2239	0.2578	0.263	-0.17	0.1518	0.843665	0.626549	1.13602		a	p	0.6971	+-+	0	0.5341	1.01664	0.935749	1.10452	0.263068	0.241856	0.15	1.10418	0.964924	1.26354	0.2485	0.2537	0.407	1.06671	0.915819	1.24247	0.2222	0.2754	0.0047	1.291
AA_DRB1_37_32660037_S	32660037	P	A	0.256	0.2384	0.141	1.07064	1.00623	1.1726	0.3287	0.2637	1.09e-05	1.58756	1.29202	1.95072	0.3746	0.2361	1.01e-05	0.6498	0.1472	1.91516	1.43518	2.55566		a	p	2.411e-05	---	82.7	9.367e-06	0.841727	0.777036	0.911802	0.285621	0.275872	0.463	1.05092	0.920488	1.19983	0.3135	0.1878	1.32e-13	1.87871	1.58987	2.22002	0.2927	0.2774	0.654	0.963
AA_DRB1_37_32660037_Y	32660037	P	A	0.3058	0.3081	0.641	0.979679	0.998229	1.06802	0.1824	0.2375	2.18e-05	0.594223	0.467294	0.75563	0.2274	0.2418	0.615	-0.07693	0.15275	0.925955	0.686383	1.24915		a	p	0.0523	+++	72.8	0.0006333	1.08069	0.9992	1.16883	0.347096	0.368905	0.138	0.911353	0.806035	1.03043	0.2328	0.3127	7.69e-06	0.70178	0.600925	0.819562	0.3707	0.3483	0.217	0.908
[truncated: 7 more columns]
